# Supplementary material for: Genome-scale analysis of aberrant DNA methylation in colorectal cancer
Source: HighWire-hosted journal article supplement (doi:10.1101/gr.117523.110), 2011-06-09

# Hinoue\_Supplemental\_Figure 1

x k=4

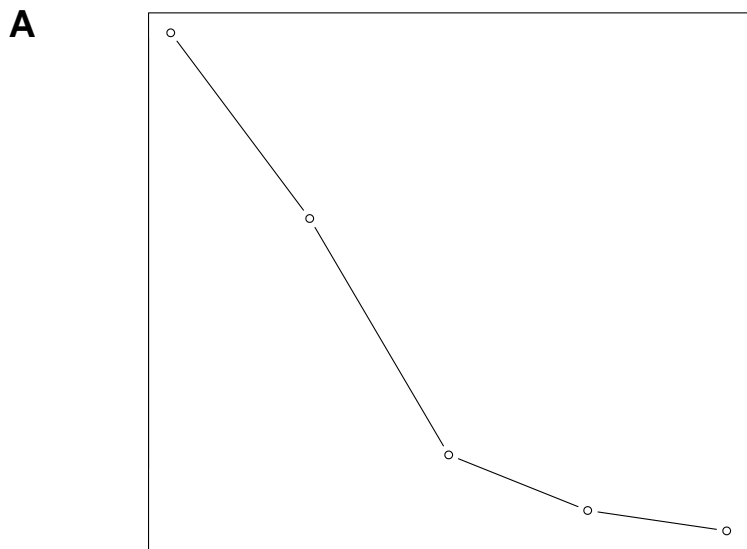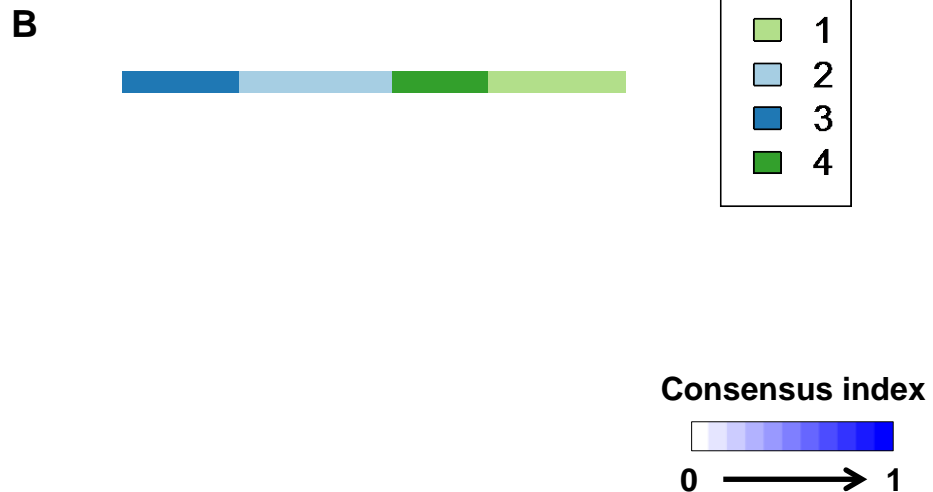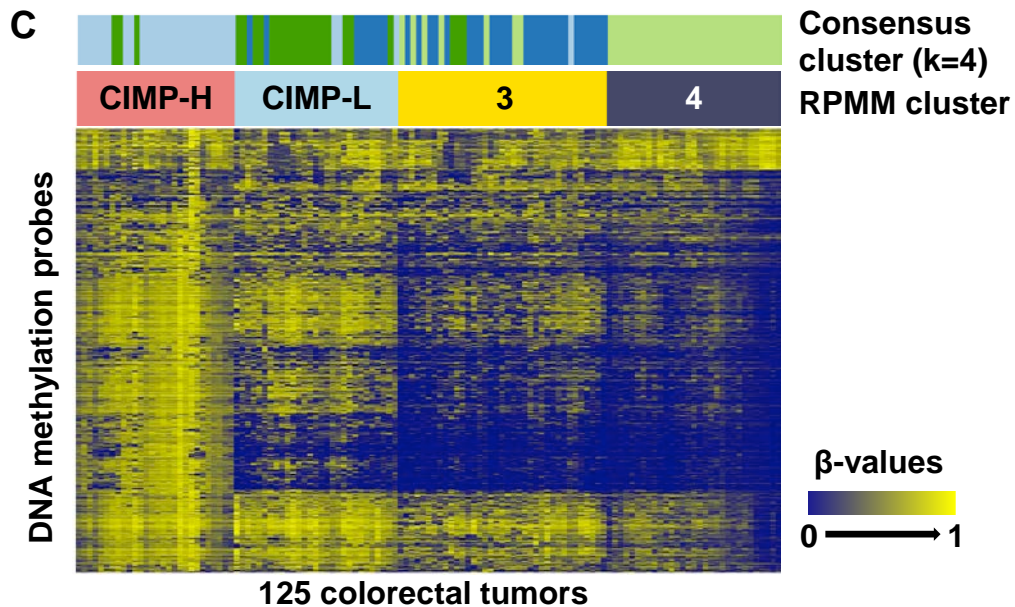

**D**

Consensus cluster

|          | 2  | 4  | 3  | 1  |
|----------|----|----|----|----|
| CIMP-H   | 28 | 3  | 0  | 0  |
| CIMP-L   | 3  | 18 | 8  | 0  |
| Cluster3 | 1  | 3  | 26 | 7  |
| Cluster4 | 0  | 0  | 1  | 31 |

RPMM cluster

# Hinoue\_Supplemental\_Figure 2

**A**

**All tumors**

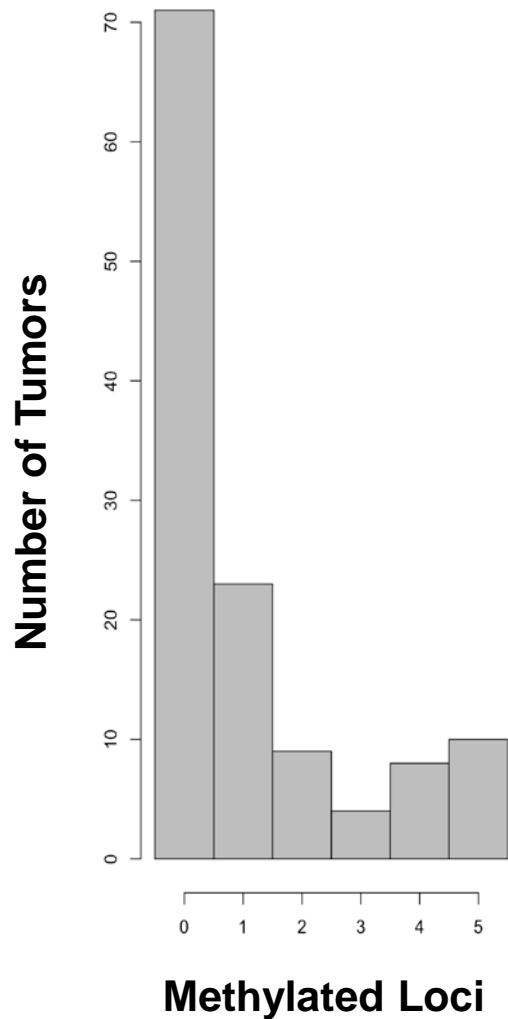

**B**

**CIMP-H**

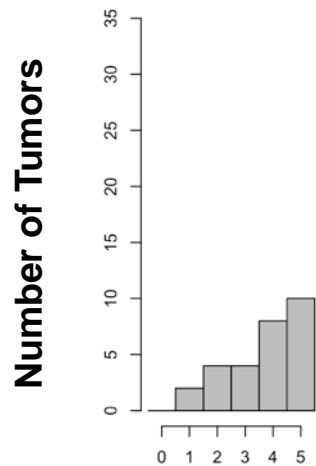

**CIMP-L**

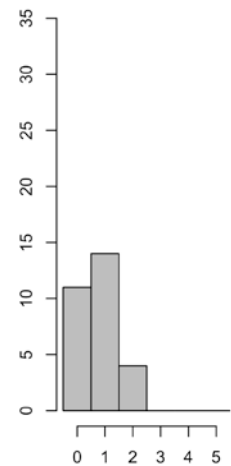

**Cluster 3**

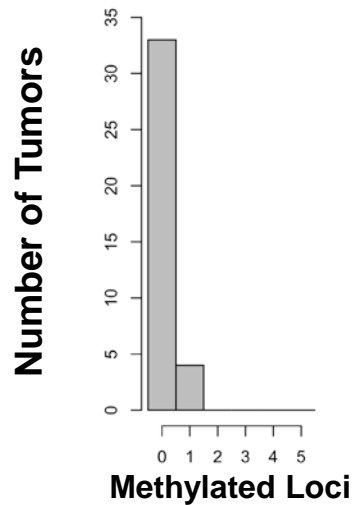

**Cluster 4**

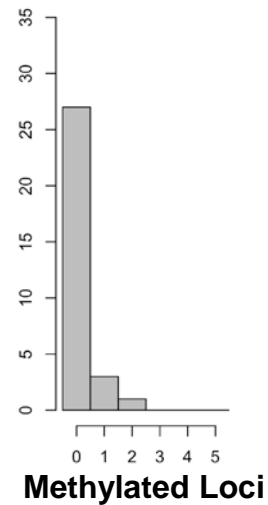

# Hinoue\_Supplemental\_Figure 3

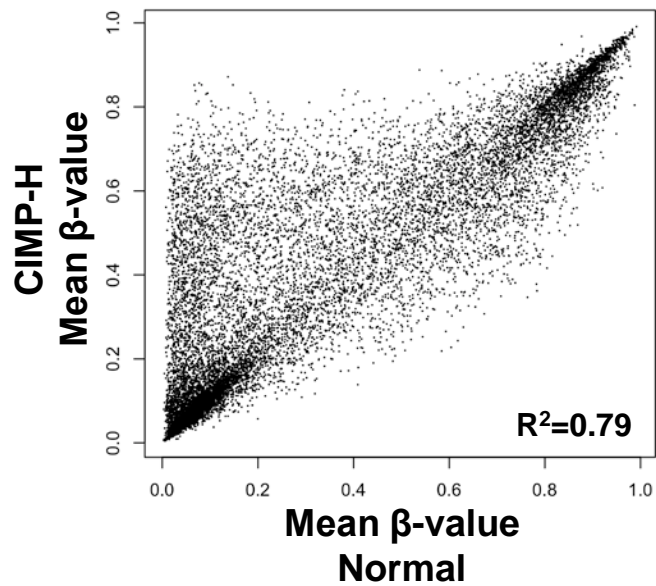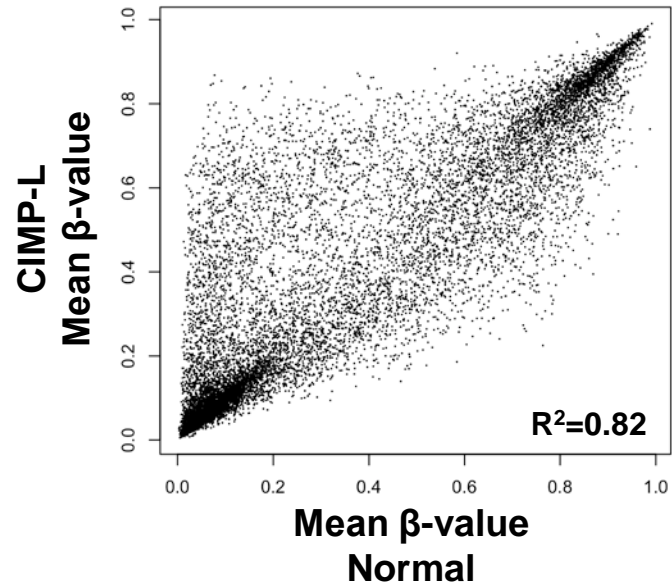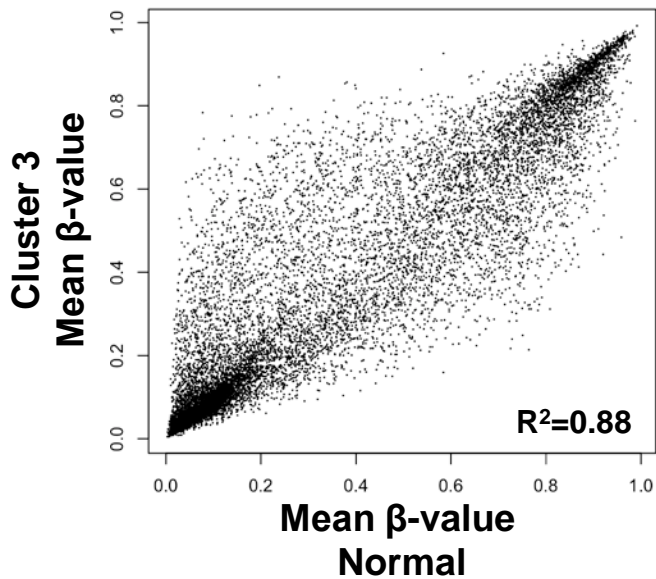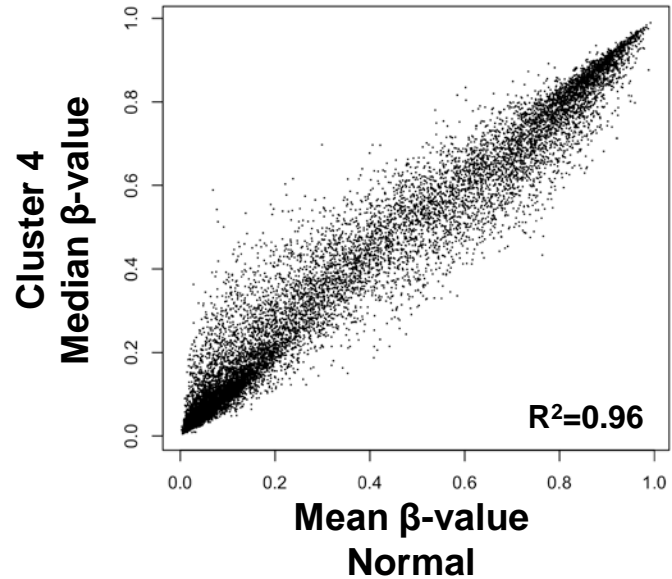

# Hinoue\_Supplemental\_Figure 4

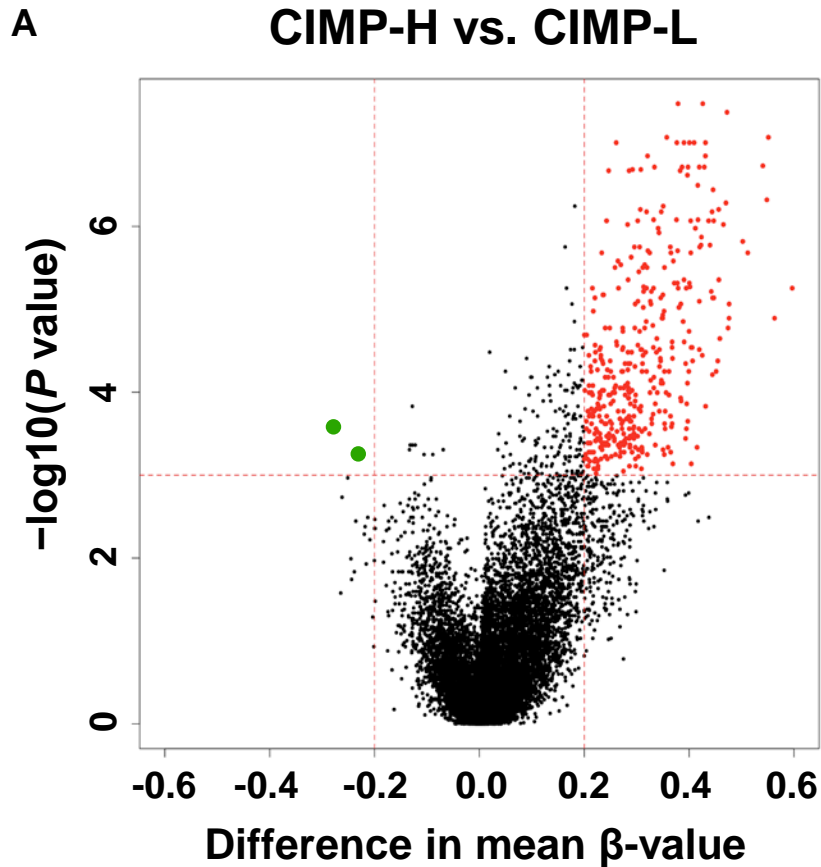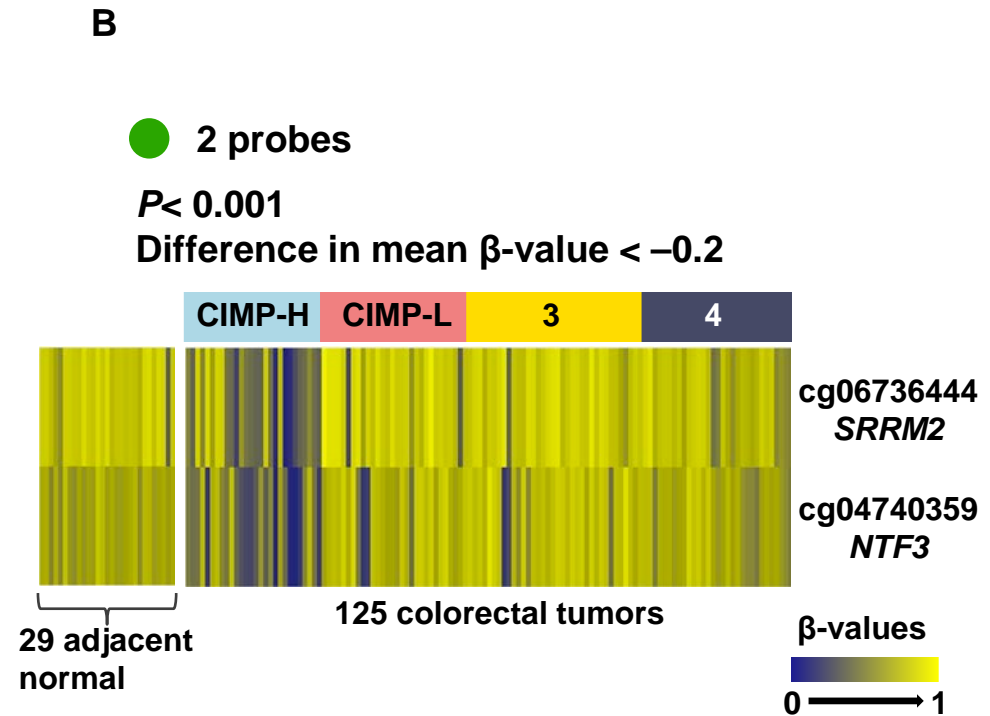

# Hinoue\_Supplemental\_Figure 5

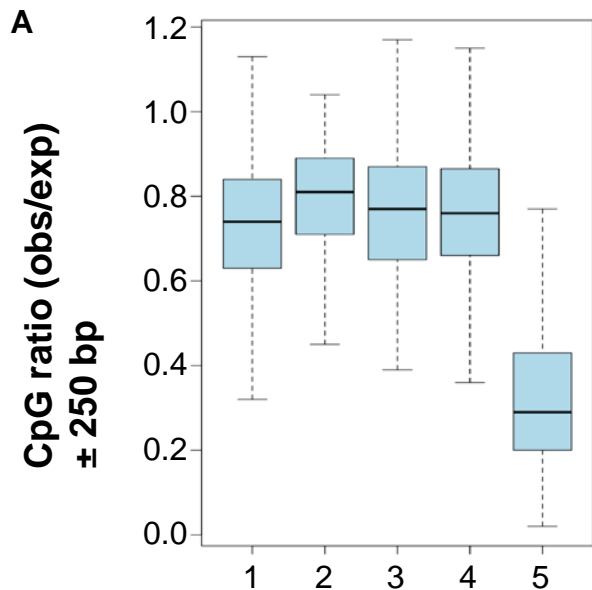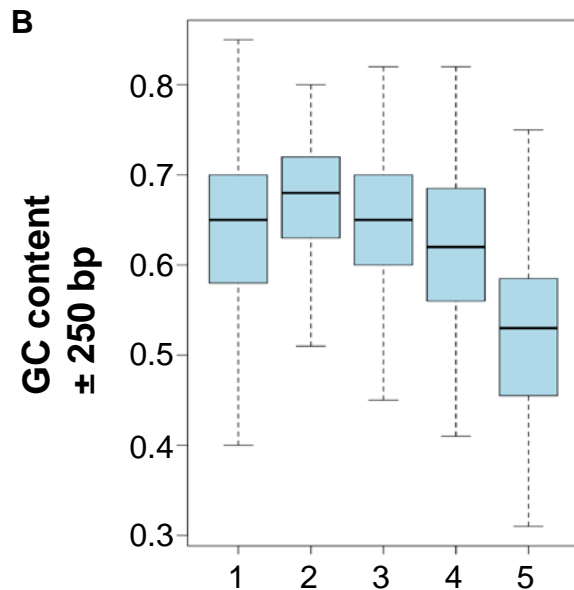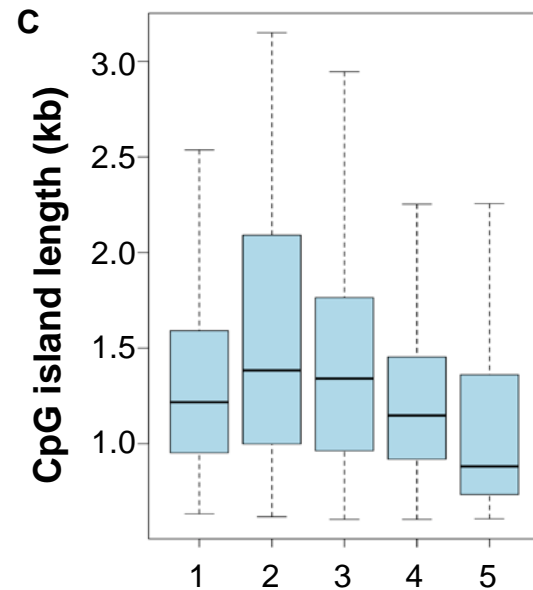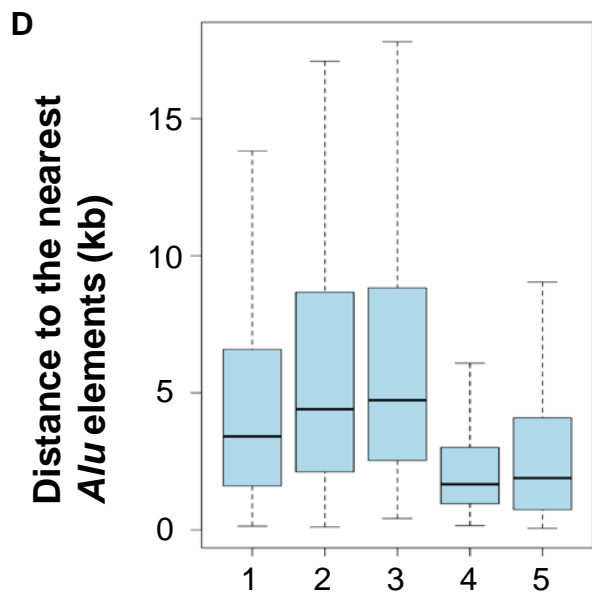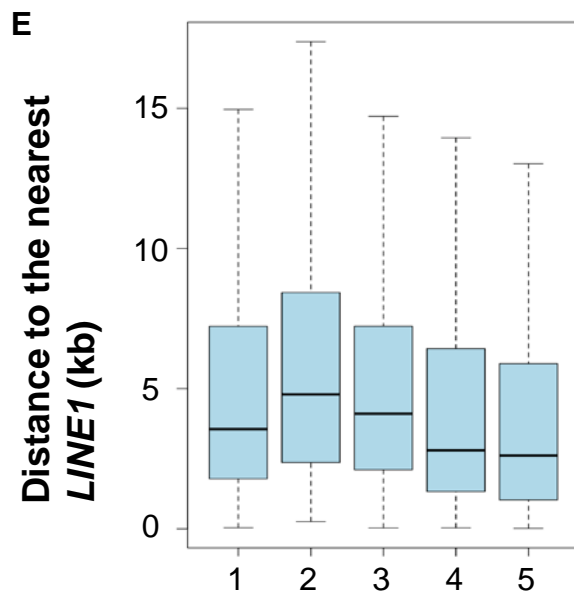

- 1: CIMP-H**
- 2: CIMP-H & L**
- 3: Non-CIMP**
- 4: Constitutively Low**
- 5: Constitutively High**

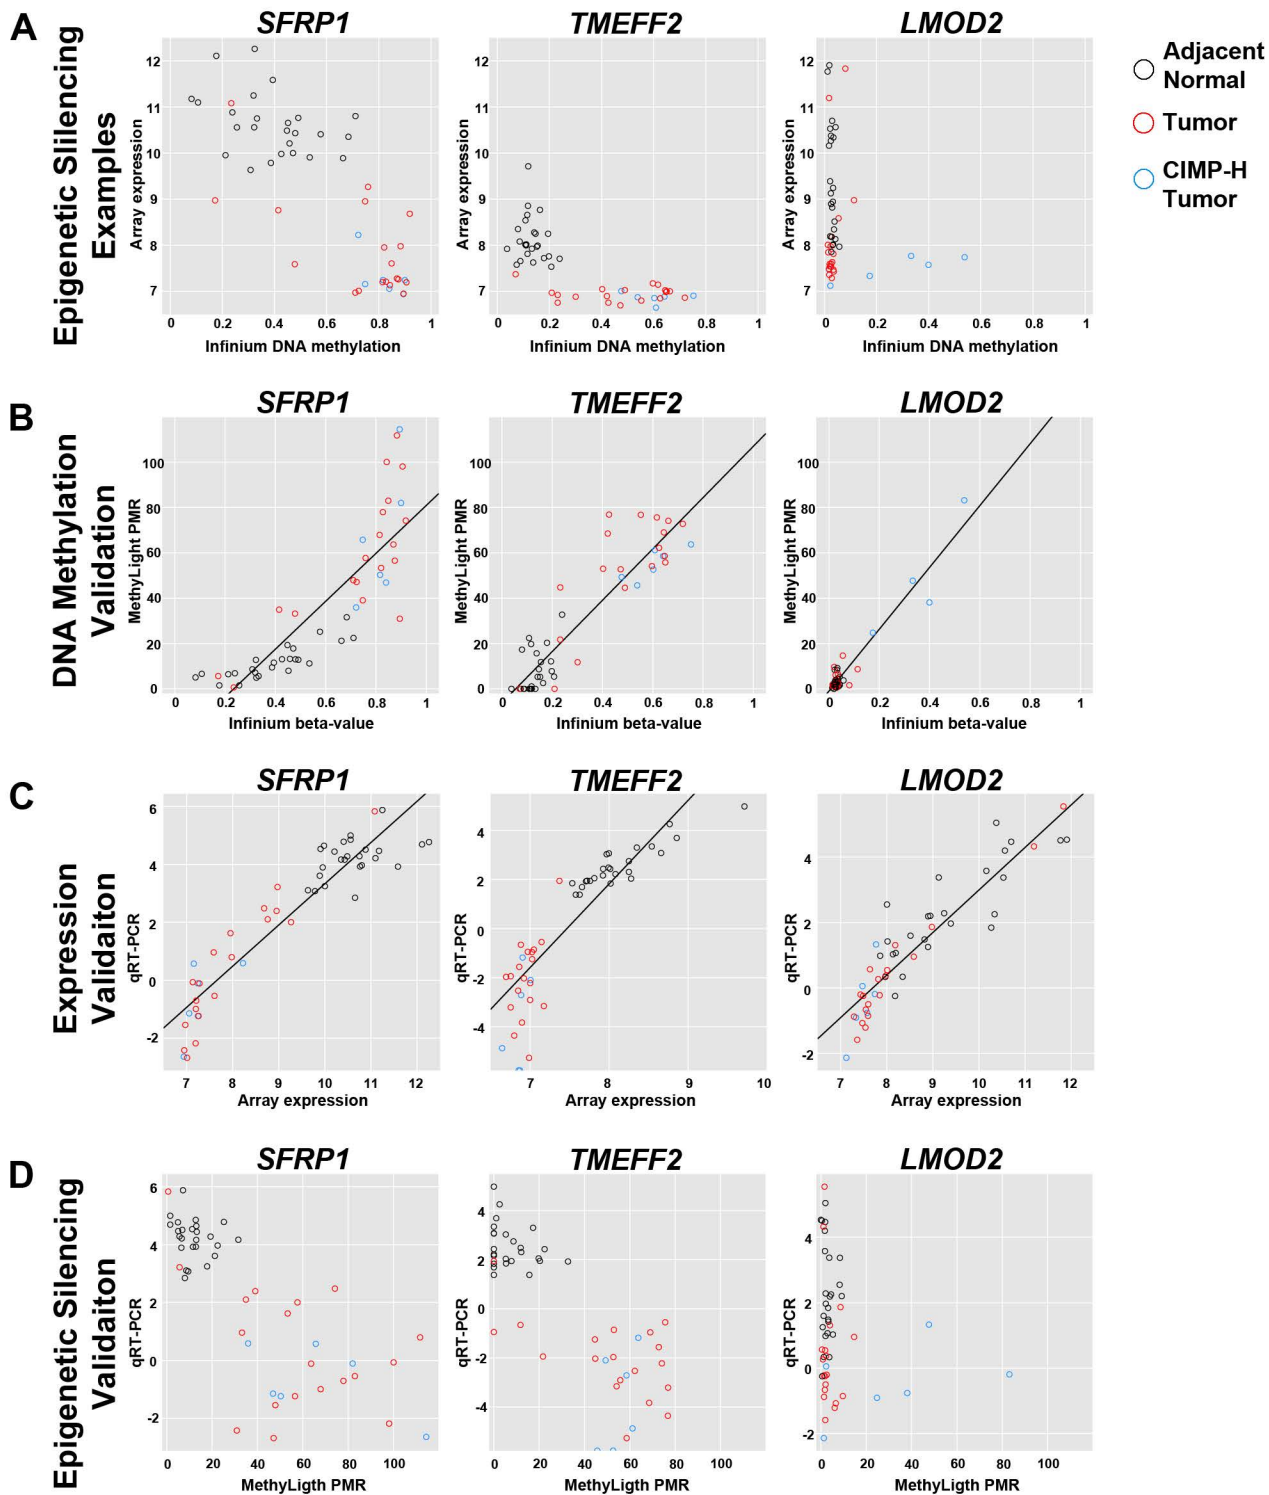

Supplement: Supp_Figures.pdf [file Supp_Figures.pdf]
