# Supplementary material for: Genome-scale analysis of aberrant DNA methylation in colorectal cancer
Source: HighWire-hosted journal article supplement (doi:10.1101/gr.117523.110), 2011-06-09
Supplement: Hinoue_Supplemental_Table1.xlsx [file Hinoue_Supplemental_Table1.xlsx]

## Sheet: Supplemental Table1
Supplemental Table 1 - Genes that are constitutively methylated in normal samples, but show variable levels of DNA hypomethylation in tumors
Illumin_ID	Symbol	Gene_ID	Chromosome	GC Content over 250 bp upstream and 250 bp downstream	Observed CpG/expected CpG ratio over 250 bp upstream and 250 bp downstream	Mean beta-value adjacent normal	Standard deviation adjacent normal
cg24240626	REG3A	5068	2	0.52	0.09	0.702595	0.0750844
cg19728382	STC2	8614	5	0.53	0.61	0.457779	0.159178
cg22718139	HMGCS2	3158	1	0.51	0.28	0.496846	0.147078
cg26153642	HTR3E	285242	3	0.53	0.35	0.475055	0.13185
cg26777475	PCOLCE	5118	7	0.64	0.3	0.637804	0.0676118
cg23640701	ACVRL1	94	12	0.64	0.61	0.432663	0.0805735
cg15914863	CYP2W1	54905	7	0.69	0.29	0.468035	0.0874234
cg19890739	GINS2	51659	16	0.57	0.44	0.412001	0.089021
cg26970800	GIF	2694	11	0.47	0.18	0.777656	0.0955826
cg17741572	CFB	629	6	0.58	0.29	0.8227	0.0807502
cg19524009	NEK3	4752	13	0.4	0.46	0.513975	0.136392
cg17044311	ABCC2	1244	10	0.35	0.27	0.814195	0.071049
cg21820890	PLA2G12B	84647	10	0.53	0.28	0.923662	0.0877325
cg26628847	PIP	5304	7	0.52	0.09	0.64242	0.0670071
cg22241124	CNGA3	1261	2	0.49	0.27	0.768329	0.0540609
cg22268164	TRHR	7201	8	0.46	0.24	0.765714	0.0507299
cg12188416	TP63	8626	3	0.43	0.31	0.557748	0.0905129
cg15320474	UBD	10537	6	0.43	0.32	0.745551	0.0788082
cg01053621	APOA2	336	1	0.47	0.18	0.742483	0.0731899
cg01430430	SRRM3	222183	7	0.56	0.41	0.537328	0.123169
cg10968815	BPIL1	80341	20	0.59	0.14	0.750724	0.0429176
cg13320683	RHOBTB1	9886	10	0.5	0.55	0.717581	0.0643407
cg12958813	ATP6V1G3	127124	1	0.42	0.09	0.80861	0.0666174
cg03483654	DAK	26007	11	0.54	0.3	0.958659	0.0986656
cg06277277	NR1I3	9970	1	0.49	0.17	0.659821	0.0936366
cg11871280	SLC16A7	9194	12	0.38	0.17	0.805456	0.0684197
cg05187322	CARD14	79092	17	0.54	0.56	0.633231	0.15786
cg04968426	PPP1R14D	54866	15	0.58	0.19	0.495816	0.158661
cg10321723	PDZK1	5174	1	0.51	0.18	0.57007	0.141141
cg11518240	FKBP4	2288	12	0.5	0.86	0.877527	0.0578825
cg12582008	OLFM4	10562	13	0.47	0.33	0.628161	0.1345
cg06806711	MS4A1	931	11	0.45	0.12	0.69434	0.0738213
cg07703337	ZNF610	162963	19	0.48	0.21	0.838655	0.0630878
cg10037068	WIPF1	7456	2	0.5	0.09	0.847714	0.0258612
cg11003133	AIM2	9447	1	0.48	0.21	0.636784	0.127887
cg24765446	WFDC6	140870	20	0.52	0.12	0.7951	0.0519009
cg10379687	SPINLW1	57119	20	0.51	0.12	0.674781	0.050788
cg14662172	CPB2	1361	13	0.42	0.18	0.819494	0.0272419
cg27609819	PLCL1	5334	2	0.44	0.12	0.833296	0.0467765
cg18678121	SEC61A2	55176	10	0.51	0.88	0.746794	0.122137
cg25683185	ACRBP	84519	12	0.62	0.58	0.614268	0.098095
cg14141399	HAS1	3036	19	0.61	0.37	0.688583	0.120229
cg27592318	HEMGN	55363	9	0.41	0.16	0.89044	0.0258579
cg17829936	TAAR5	9038	6	0.5	0.26	0.717844	0.098397
cg21660392	ABCA8	10351	17	0.37	0.12	0.702542	0.053415
cg14258236	OR5V1	81696	6	0.44	0.17	0.864356	0.0395122
cg22983092	KRT25	147183	17	0.49	0.23	0.910972	0.0314842
cg13675849	TRPV5	56302	7	0.53	0.31	0.886805	0.034278
cg21122774	SARDH	1757	9	0.6	0.23	0.72392	0.0973912
cg19241311	DEFB123	245936	20	0.55	0.19	0.677205	0.05318
cg26390526	FLG	2312	1	0.41	0.27	0.860085	0.0516085
cg18982568	KRT77	374454	12	0.53	0.18	0.750949	0.0649124
cg25995212	SCN7A	6332	2	0.44	0.12	0.842971	0.051238
cg23984130	IGKV7-3	28905	2	0.48	0.11	0.8315	0.035416
cg14826683	SPRR2D	6703	1	0.45	0.12	0.750042	0.0606179
cg20312687	DEFB118	117285	20	0.5	0.1	0.785589	0.0416229
cg18152517	STRA8	346673	7	0.5	0.03	0.838219	0.0330998
cg17423978	SIRPD	128646	20	0.46	0.35	0.809914	0.0461985
cg20556988	CCL1	6346	17	0.55	0.11	0.830349	0.0312368
cg01910481	PLUNC	51297	20	0.46	0.07	0.8824	0.0513218
cg06531741	HTR3B	9177	11	0.44	0.17	0.808195	0.0809933
cg12718562	TBC1D21	161514	15	0.49	0.17	0.83379	0.0434452
cg11009736	MARCO	8685	2	0.52	0.21	0.618008	0.0630692
cg00079056	SPINK4	27290	9	0.46	0.43	0.840277	0.0385653
cg06275635	PGLYRP3	114771	1	0.44	0.09	0.756682	0.0421878
cg08332212	MLN	4295	6	0.47	0.3	0.782878	0.0461925
cg10539808	KCTD1	284252	18	0.5	0.22	0.716035	0.0518193
cg10784090	CLDN18	51208	3	0.52	0.39	0.871566	0.0414557
cg01796228	LIFR	3977	5	0.5	0.58	0.75434	0.0539613
cg09440243	PTPRD	5789	9	0.41	0.39	0.797107	0.0372562
cg10054857	C18orf20	221241	18	0.44	0.25	0.763656	0.0591594
cg03109316	ZNF80	7634	3	0.56	0.44	0.900518	0.0209587
cg08947964	GJA10	84694	6	0.36	0.26	0.833922	0.057795
cg05241571	KRTDAP	388533	19	0.57	0.2	0.910396	0.0196159
cg03167883	FLJ46365	401459	8	0.51	0.19	0.685307	0.0780853
cg07950803	CD1A	909	1	0.37	0.13	0.808417	0.0506198
cg00463848	KRT2	3849	12	0.49	0.13	0.8382	0.0546897
cg09458237	HSPA12B	116835	20	0.52	0.18	0.722157	0.0608122
cg06501070	LPAR3	23566	1	0.42	0.23	0.713531	0.0672622
cg01497576	SLC24A5	283652	15	0.55	0.19	0.755799	0.0436874
cg12682367	FLJ46358	400110	13	0.56	0.2	0.71008	0.0589443
cg03731898	CPO	130749	2	0.43	0.13	0.796046	0.0435543
cg08786003	FCRL3	115352	1	0.41	0.24	0.675903	0.0984031
cg12878228	PRSS1	5644	7	0.51	0.19	0.76213	0.0351844
cg01446692	CER1	9350	9	0.38	0.22	0.697304	0.056882
cg02786019	TRPV6	55503	7	0.52	0.27	0.619254	0.0829444
cg10057218	GSDMB	55876	17	0.5	0.2	0.801679	0.0601873
cg04457794	CTSE	1510	1	0.57	0.27	0.60279	0.116539
cg05109049	EVI2B	2124	17	0.32	0.24	0.478905	0.142311
cg11783497	IL1RN	3557	2	0.54	0.19	0.68028	0.127752
cg19099213	SPP2	6694	2	0.39	0.11	0.841658	0.0626492
cg23067535	FAM83A	84985	8	0.65	0.44	0.621806	0.137348
cg22442090	GIMAP5	55340	7	0.52	0.21	0.716063	0.0395192
cg26718420	C12orf59	120939	12	0.41	0.24	0.795854	0.0698539
cg17030820	MSMB	4477	10	0.49	0.3	0.835339	0.0780785
cg17827767	LRIT1	26103	10	0.63	0.23	0.815386	0.0527074
cg18959422	MYBPH	4608	1	0.6	0.22	0.61122	0.0640989
cg20227165	PRDM11	56981	11	0.57	0.15	0.689885	0.045902
cg17778867	KRTAP10-8	386681	21	0.6	0.14	0.697146	0.109676
cg15075718	MFRP	83552	11	0.59	0.16	0.749563	0.0577409
cg21044104	LYZL4	131375	3	0.46	0.16	0.674484	0.0776919
cg20383064	BFSP2	8419	3	0.49	0.1	0.859852	0.0516989
cg24490338	TPM3	7170	1	0.48	0.07	0.83351	0.0427082
cg17761453	LOR	4014	1	0.47	0.07	0.791744	0.0745308
cg18848394	KRT38	8687	17	0.42	0.18	0.717893	0.0613834
cg02034222	DQX1	165545	2	0.49	0.24	0.562714	0.136487
cg14401837	NPSR1	387129	7	0.45	0.27	0.523309	0.140112
cg18738906	SCNN1A	6337	12	0.62	0.49	0.605275	0.151464
cg24607535	CDH26	60437	20	0.44	0.21	0.629217	0.105368
cg00808492	REG4	83998	1	0.4	0.36	0.503247	0.142269
cg21682902	HAL	3034	12	0.4	0.2	0.749918	0.131147
cg14898779	STK31	56164	7	0.51	0.84	0.764234	0.0996928
cg22213042	CPA2	1358	7	0.41	0.09	0.427101	0.146784
cg14934821	GPSM1	26086	9	0.65	0.44	0.700421	0.166515
cg15021292	PIK3R1	5295	5	0.49	0.29	0.503333	0.137007
cg21906716	TP73	7161	1	0.55	0.59	0.676538	0.121498
cg17003970	CHFR	55743	12	0.56	0.73	0.781305	0.206835
cg04117029	UROS	7390	10	0.41	0.24	0.613728	0.138982
cg20916523	VHL	7428	3	0.52	0.43	0.714541	0.122916
