# Supplementary material for: Genome-scale analysis of aberrant DNA methylation in colorectal cancer
Source: HighWire-hosted journal article supplement (doi:10.1101/gr.117523.110), 2011-06-09
Supplement: Hinoue_Supplemental_Table2.xlsx [file Hinoue_Supplemental_Table2.xlsx]

## Sheet: 201110421.SuppTable2.txt
Supplemental Table 2 - List of probes that are significantly more methylated in both CIMP-H and CIMP-L tumors compared with Non-CIMP tumors
Infinium Probe ID	ENTRZ Gene ID	HUGO Gene Symbol	CIMP-H tumors			CIMP-L tumors
			Mean beta-value	P value (vs. Non-CIMP)	FDR-adjusted P value	Mean beta-value	P value (vs. Non-CIMP)	FDR-adjusted P value
cg00107187	388021	TMEM179	0.648392	1.86625e-10	8.16787e-09	0.633864	4.24091e-09	1.22749e-06
cg00243313	50805	IRX4	0.598442	5.22751e-07	9.07104e-06	0.657415	3.13099e-10	2.68656e-07
cg00273068	90187	EMILIN3	0.566596	8.49355e-08	1.79182e-06	0.577609	7.13006e-09	1.70087e-06
cg00318573	1137	CHRNA4	0.65562	1.07472e-09	3.63395e-08	0.642074	6.80319e-09	1.65937e-06
cg00472814	9510	ADAMTS1	0.662019	5.67142e-08	1.2461e-06	0.651898	1.50461e-07	1.48464e-05
cg00512279	6571	SLC18A2	0.554637	2.76859e-06	4.03359e-05	0.600671	5.29485e-08	6.88267e-06
cg00557354	8874	ARHGEF7	0.781404	3.02644e-14	3.53973e-11	0.49028	1.97162e-08	3.47967e-06
cg00565688	7161	TP73	0.536935	3.59916e-08	8.30293e-07	0.528236	5.29485e-08	6.88267e-06
cg00625653	7476	WNT7A	0.699571	1.06678e-12	1.41205e-10	0.544394	1.86217e-07	1.70566e-05
cg00654814	146664	MGAT5B	0.72123	1.68741e-09	5.41869e-08	0.742682	6.64101e-11	1.82985e-07
cg00685836	8499	PPFIA2	0.477508	3.71558e-09	1.07831e-07	0.405318	1.83025e-06	9.34849e-05
cg00687686	65009	NDRG4	0.711606	3.80424e-12	3.34342e-10	0.657216	3.13099e-10	2.68656e-07
cg00746981	3068	HDGF	0.434578	6.34308e-12	5.00712e-10	0.355524	1.32297e-07	1.35468e-05
cg00756058	22873	DZIP1	0.66282	1.86625e-10	8.16787e-09	0.541512	7.94164e-07	5.02615e-05
cg00826384	5803	PTPRZ1	0.522177	4.65603e-11	2.61847e-09	0.407366	2.20611e-07	1.96271e-05
cg00902195	341359	SYT10	0.599302	1.01468e-07	2.09579e-06	0.587613	3.35594e-07	2.62999e-05
cg00995327	9435	CHST2	0.772227	1.21097e-07	2.44994e-06	0.74121	9.32959e-07	5.67302e-05
cg01173186	140767	NRSN1	0.609843	3.2392e-06	4.666e-05	0.61057	1.83025e-06	9.34849e-05
cg01192900	54766	BTG4	0.758663	2.60811e-08	6.22163e-07	0.752496	2.36468e-08	3.91852e-06
cg01291404	1280	COL2A1	0.51006	4.67407e-13	7.98934e-11	0.364633	1.1362e-08	2.4181e-06
cg01313514	89780	WNT3A	0.551417	3.80424e-12	3.34342e-10	0.502499	1.69493e-10	2.16433e-07
cg01322134	89780	WNT3A	0.716806	5.05704e-12	4.19001e-10	0.645555	1.26712e-09	7.05301e-07
cg01468621	9024	BRSK2	0.574336	2.18445e-10	9.37153e-09	0.457052	1.13951e-06	6.57883e-05
cg01519742	152789	JAKMIP1	0.695449	1.51155e-10	6.83601e-09	0.628164	4.66359e-09	1.28148e-06
cg01555431	9590	AKAP12	0.743534	1.34915e-06	2.12999e-05	0.741299	1.13951e-06	6.57883e-05
cg01593190	9509	ADAMTS2	0.525718	1.42229e-08	3.6281e-07	0.500132	2.25983e-08	3.77356e-06
cg01643580	3777	KCNK3	0.62735	4.52157e-08	1.01609e-06	0.622116	2.06348e-08	3.58352e-06
cg01656955	84618	NT5C1A	0.556	8.8843e-11	4.38319e-09	0.425878	1.83025e-06	9.34849e-05
cg01697732	54757	FAM20A	0.852098	3.26919e-13	6.75881e-11	0.55343	1.13951e-06	6.57883e-05
cg01699584	386617	KCTD8	0.441112	5.47697e-11	2.97235e-09	0.274121	7.32449e-07	4.7181e-05
cg01775414	112885	PHF21B	0.708257	2.63582e-09	7.99141e-08	0.661188	2.72299e-07	2.28227e-05
cg01946574	5797	PTPRM	0.691163	5.67142e-08	1.2461e-06	0.710443	8.20498e-09	1.89483e-06
cg02136132	56659	KCNK13	0.546648	2.358e-14	3.53973e-11	0.270846	1.39764e-09	7.4e-07
cg02361557	22854	NTNG1	0.55896	9.94902e-12	7.15144e-10	0.397825	1.78465e-07	1.66988e-05
cg02407785	5101	PCDH9	0.319097	7.16577e-10	2.58826e-08	0.262067	1.33577e-06	7.49273e-05
cg02503850	140766	ADAMTS14	0.572141	5.01261e-07	8.73305e-06	0.575703	3.64702e-07	2.81742e-05
cg02508567	83439	TCF7L1	0.66266	2.14806e-13	5.6866e-11	0.410442	3.08735e-07	2.49145e-05
cg02860342	10021	HCN4	0.61133	1.86167e-06	2.83601e-05	0.610756	1.44571e-06	7.84589e-05
cg02899772	54550	NECAB2	0.558601	2.90842e-09	8.67252e-08	0.52233	3.87901e-08	5.65137e-06
cg02932167	9427	ECEL1	0.765159	5.15668e-06	7.04033e-05	0.786027	2.25983e-08	3.77356e-06
cg02982690	27319	BHLHE22	0.483129	2.54697e-12	2.45732e-10	0.392668	2.38608e-09	9.24946e-07
cg03038003	79656	BEND5	0.619109	2.50902e-09	7.67126e-08	0.559355	1.71025e-07	1.63551e-05
cg03168582	1761	DMRT1	0.709825	5.22751e-07	9.07104e-06	0.728925	1.32297e-07	1.35468e-05
cg03285457	10660	LBX1	0.517139	5.35823e-06	7.29257e-05	0.531189	1.5039e-06	8.08085e-05
cg03414321	3055	HCK	0.402086	1.51155e-10	6.83601e-09	0.293976	8.58245e-08	9.85756e-06
cg03455458	79805	VASH2	0.354728	9.74154e-09	2.5417e-07	0.377388	3.67596e-09	1.1083e-06
cg03732545	6900	CNTN2	0.552659	1.38171e-09	4.57229e-08	0.543393	1.78465e-07	1.66988e-05
cg03734874	388021	TMEM179	0.73225	2.73143e-08	6.44499e-07	0.731987	4.0438e-09	1.2025e-06
cg03777459	140628	GATA5	0.591513	1.56244e-08	3.9439e-07	0.61736	1.966e-09	8.97338e-07
cg03848675	2295	FOXF2	0.300182	2.99528e-08	7.01419e-07	0.285479	3.80155e-07	2.86542e-05
cg04080057	59285	CACNG6	0.652527	9.28878e-09	2.43822e-07	0.628893	3.70946e-08	5.47789e-06
cg04101379	22873	DZIP1	0.604535	6.03535e-09	1.66052e-07	0.554124	8.60871e-07	5.33937e-05
cg04251363	10402	ST3GAL6	0.407092	2.231e-07	4.20769e-06	0.317378	1.3897e-06	7.65673e-05
cg04270799	3798	KIF5A	0.617025	1.07123e-08	2.78828e-07	0.590597	4.43396e-08	6.05361e-06
cg04274487	11031	RAB31	0.59371	2.21502e-14	3.53973e-11	0.289656	1.64231e-08	3.07338e-06
cg04330449	4762	NEUROG1	0.755427	3.36833e-06	4.81368e-05	0.770488	2.72299e-07	2.28227e-05
cg04369341	84969	TOX2	0.585033	4.51979e-10	1.75835e-08	0.504464	1.26729e-07	1.31628e-05
cg04391111	7161	TP73	0.559538	2.76859e-06	4.03359e-05	0.624414	3.34077e-09	1.03602e-06
cg04418492	9420	CYP7B1	0.545512	1.44378e-07	2.86224e-06	0.52197	2.0271e-07	1.83351e-05
cg04549333	60529	ALX4	0.610691	8.42153e-11	4.1834e-09	0.512188	1.38102e-07	1.4009e-05
cg04603031	1136	CHRNA3	0.68477	1.35687e-08	3.47757e-07	0.713714	7.35809e-10	4.69792e-07
cg04713521	51450	PRRX2	0.650028	3.14707e-10	1.27219e-08	0.624071	7.73314e-10	4.79632e-07
cg04765277	399717	FLJ45983	0.635606	3.72982e-07	6.69148e-06	0.618264	9.71148e-07	5.8398e-05
cg04897683	4762	NEUROG1	0.718465	3.43797e-08	7.96493e-07	0.71013	2.47426e-08	4.0083e-06
cg04981492	85360	SYDE1	0.600055	1.7196e-07	3.33892e-06	0.567276	3.64702e-07	2.81742e-05
cg04988423	60529	ALX4	0.653277	5.22142e-09	1.45316e-07	0.651008	1.36667e-08	2.77269e-06
cg05028467	6620	SNCB	0.657148	3.91014e-13	7.25481e-11	0.523889	1.18011e-10	1.82985e-07
cg05056120	1879	EBF1	0.515312	9.70648e-08	2.01249e-06	0.511017	3.08735e-07	2.49145e-05
cg05421688	148753	FAM163A	0.486729	7.513e-12	5.66292e-10	0.347023	3.96239e-07	2.95586e-05
cg05436658	5579	PRKCB	0.602855	3.76768e-08	8.60934e-07	0.591244	2.83957e-07	2.35272e-05
cg05774801	6423	SFRP2	0.598423	1.93759e-06	2.93314e-05	0.610485	7.32449e-07	4.7181e-05
cg05882522	30845	EHD3	0.535122	2.86041e-08	6.73467e-07	0.480406	1.6271e-06	8.57307e-05
cg05899618	151449	GDF7	0.635125	1.80133e-12	1.91682e-10	0.547806	2.68785e-10	2.65218e-07
cg05942574	8913	CACNA1G	0.430058	2.273e-09	7.01881e-08	0.387902	3.80155e-07	2.86542e-05
cg06110728	4753	NELL2	0.47753	8.85651e-09	2.33889e-07	0.448103	1.05209e-06	6.2231e-05
cg06243556	65982	ZSCAN18	0.670406	4.59466e-06	6.33276e-05	0.698921	2.61105e-07	2.21409e-05
cg06268694	9620	CELSR1	0.794264	1.60408e-12	1.78572e-10	0.654585	1.18579e-06	6.80985e-05
cg06321883	1310	COL19A1	0.624561	3.42736e-14	3.53973e-11	0.398643	1.56433e-06	8.34362e-05
cg06339657	8622	PDE8B	0.61048	1.88411e-08	4.65304e-07	0.571252	7.62705e-07	4.84117e-05
cg06357925	5800	PTPRO	0.657425	1.5935e-10	7.16184e-09	0.613949	1.71924e-08	3.13624e-06
cg06557358	124842	TMEM132E	0.595028	1.77359e-09	5.67026e-08	0.609128	1.46772e-09	7.40962e-07
cg06668300	4118	MAL	0.594624	2.43204e-07	4.5552e-06	0.649677	3.83426e-10	2.87014e-07
cg06894812	4163	MCC	0.544966	1.55414e-11	1.01925e-09	0.373206	1.44571e-06	7.84589e-05
cg06905514	816	CAMK2B	0.720234	7.513e-12	5.66292e-10	0.630127	2.47426e-08	4.0083e-06
cg07015629	2066	ERBB4	0.67159	6.49238e-08	1.40235e-06	0.656736	2.96096e-07	2.40736e-05
cg07017374	2322	FLT3	0.806952	1.42807e-12	1.73188e-10	0.696517	1.71924e-08	3.13624e-06
cg07075930	5797	PTPRM	0.562021	3.87175e-10	1.53653e-08	0.452238	2.40034e-07	2.09263e-05
cg07109287	9355	LHX2	0.852046	3.22077e-14	3.53973e-11	0.520788	1.94295e-07	1.76475e-05
cg07143898	6585	SLIT1	0.601251	9.18717e-14	3.62609e-11	0.356826	2.06371e-09	8.97338e-07
cg07236943	23089	PEG10	0.285658	2.0682e-08	5.04454e-07	0.251122	8.96217e-07	5.52701e-05
cg07295678	10570	DPYSL4	0.690334	1.38182e-07	2.74945e-06	0.712903	1.30512e-08	2.69825e-06
cg07570142	26002	MOXD1	0.734768	7.93298e-10	2.80471e-08	0.679236	1.1135e-07	1.18489e-05
cg07651242	107	ADCY1	0.729989	4.09621e-09	1.17309e-07	0.677566	4.304e-07	3.10403e-05
cg07696033	60529	ALX4	0.414915	2.4254e-10	1.01839e-08	0.409763	2.8931e-09	9.9688e-07
cg07703401	3049	HBQ1	0.723046	1.15871e-07	2.3596e-06	0.692417	1.3897e-06	7.65673e-05
cg07710481	26050	SLITRK5	0.412701	5.35823e-06	7.29257e-05	0.470449	2.58875e-08	4.13211e-06
cg07935568	2862	MLNR	0.6591	4.67407e-13	7.98934e-11	0.481214	3.96239e-07	2.95586e-05
cg08045570	2295	FOXF2	0.653012	1.12323e-08	2.91315e-07	0.687345	2.42711e-10	2.65218e-07
cg08132931	119	ADD2	0.615005	2.1366e-07	4.0543e-06	0.653138	1.46772e-09	7.40962e-07
cg08190044	57198	ATP8B2	0.751982	2.73143e-08	6.44499e-07	0.749539	7.83025e-09	1.82773e-06
cg08209133	201780	SLC10A4	0.537992	2.57266e-13	6.07035e-11	0.399678	4.24093e-08	5.86383e-06
cg08244522	7056	THBD	0.461786	1.87598e-07	3.60387e-06	0.460504	4.05605e-08	5.75483e-06
cg08315770	89822	KCNK17	0.698465	9.76584e-14	3.65512e-11	0.496586	4.87023e-07	3.42146e-05
cg08555612	60675	PROK2	0.654186	1.34732e-12	1.65241e-10	0.368221	7.32449e-07	4.7181e-05
cg08575537	2056	EPO	0.79266	3.42581e-07	6.22322e-06	0.816552	6.19259e-09	1.58151e-06
cg08859916	5728	PTEN	0.546397	5.28666e-14	3.53973e-11	0.317016	9.77841e-08	1.09984e-05
cg08876932	401	PHOX2A	0.548595	6.73532e-06	8.91527e-05	0.614812	3.03541e-09	9.98375e-07
cg08896945	797	CALCB	0.568589	1.90868e-12	1.99201e-10	0.434987	1.75997e-06	9.09651e-05
cg09053680	8433	UTF1	0.748528	1.93759e-06	2.93314e-05	0.752527	5.97709e-07	4.09308e-05
cg09147222	131034	CPNE4	0.488129	7.2653e-06	9.55271e-05	0.560645	4.44737e-09	1.25381e-06
cg09191327	59335	PRDM12	0.606855	2.76886e-09	8.31347e-08	0.575866	1.19e-08	2.50801e-06
cg09231514	125988	C19orf70	0.367561	3.36947e-09	9.9381e-08	0.296813	2.61105e-07	2.21409e-05
cg09313439	1000	CDH2	0.548701	1.78862e-06	2.73625e-05	0.571228	4.43396e-08	6.05361e-06
cg09416313	4145	MATK	0.626533	2.90842e-09	8.67252e-08	0.615045	6.49091e-09	1.61959e-06
cg09437522	2778	GNAS	0.603753	4.09621e-09	1.17309e-07	0.564804	7.62705e-07	4.84117e-05
cg09440289	5800	PTPRO	0.584625	3.74624e-11	2.17442e-09	0.461514	7.62705e-07	4.84117e-05
cg09495977	94031	HTRA3	0.526814	5.05704e-12	4.19001e-10	0.487099	6.99947e-11	1.82985e-07
cg09622447	875	CBS	0.678345	7.9562e-13	1.09312e-10	0.425605	1.71025e-07	1.63551e-05
cg09628601	4861	NPAS1	0.654647	5.84232e-10	2.18664e-08	0.654792	1.54123e-09	7.60386e-07
cg09660171	4010	LMX1B	0.530952	1.35983e-10	6.26735e-09	0.473831	1.57034e-07	1.54249e-05
cg09750385	2982	GUCY1A3	0.286573	4.59466e-06	6.33276e-05	0.3089	4.304e-07	3.10403e-05
cg09874752	6425	SFRP5	0.581035	1.1766e-11	8.13428e-10	0.447601	1.1362e-08	2.4181e-06
cg09945801	7486	WRN	0.668031	7.42797e-08	1.58551e-06	0.680081	2.16614e-09	8.97338e-07
cg09949775	1311	COMP	0.661568	6.79496e-11	3.47889e-09	0.553659	2.30124e-07	2.02249e-05
cg09979256	84870	RSPO3	0.583618	6.03535e-09	1.66052e-07	0.577265	9.88604e-09	2.18986e-06
cg10158080	6660	SOX5	0.638789	9.7152e-10	3.3529e-08	0.675397	2.55128e-11	1.30091e-07
cg10247252	8811	GALR2	0.43274	7.17017e-11	3.6452e-09	0.395444	2.61105e-07	2.21409e-05
cg10486998	2587	GALR1	0.651726	8.60852e-07	1.42652e-05	0.629053	1.90323e-06	9.60821e-05
cg10605520	11255	HRH3	0.524876	1.04269e-10	5.01876e-09	0.291322	1.90323e-06	9.60821e-05
cg10646402	5800	PTPRO	0.688966	4.07698e-10	1.60623e-08	0.630099	7.52868e-08	8.88221e-06
cg10647513	3039	HBA1	0.497271	3.89143e-07	6.94697e-06	0.498274	2.15949e-08	3.66236e-06
cg10920957	57338	JPH3	0.565587	5.47697e-11	2.97235e-09	0.436805	5.07446e-07	3.54201e-05
cg11189837	9510	ADAMTS1	0.614504	5.00943e-10	1.92468e-08	0.537564	3.35594e-07	2.62999e-05
cg11248413	4762	NEUROG1	0.746538	1.19903e-12	1.54931e-10	0.540842	1.06637e-07	1.16326e-05
cg11260848	60529	ALX4	0.5996	6.79496e-11	3.47889e-09	0.519627	6.75368e-07	4.4562e-05
cg11319389	84969	TOX2	0.601536	6.47112e-10	2.37289e-08	0.55673	7.52868e-08	8.88221e-06
cg11399100	25789	TMEM59L	0.593863	6.28509e-13	9.54103e-11	0.396491	9.43682e-09	2.1119e-06
cg11428724	5081	PAX7	0.833135	6.34308e-12	5.00712e-10	0.816493	1.33358e-11	1.13582e-07
cg11438428	256297	PTF1A	0.785119	4.97465e-09	1.39702e-07	0.764612	3.18453e-09	1.01661e-06
cg11668923	8038	ADAM12	0.697637	4.67407e-13	7.98934e-11	0.587308	3.46525e-10	2.68656e-07
cg11670211	50507	NOX4	0.49719	7.10246e-08	1.52202e-06	0.420095	1.33577e-06	7.49273e-05
cg11747771	2731	GLDC	0.712345	4.75847e-10	1.8413e-08	0.642658	8.96444e-08	1.02421e-05
cg11768886	55351	STK32B	0.343116	3.93597e-06	5.51239e-05	0.36579	1.75997e-06	9.09651e-05
cg11847808	2046	EPHA8	0.580307	7.94807e-12	5.94954e-10	0.526859	4.4607e-10	3.22777e-07
cg11935147	9659	PDE4DIP	0.698079	6.35963e-14	3.53973e-11	0.580041	8.59713e-09	1.96449e-06
cg11939071	1840	DTX1	0.649497	6.24244e-06	8.32377e-05	0.697998	4.24091e-09	1.22749e-06
cg11981631	6833	ABCC8	0.635067	1.24607e-13	4.1615e-11	0.439919	1.1362e-08	2.4181e-06
cg12005098	387700	SLC16A12	0.707463	8.26087e-07	1.37732e-05	0.709356	4.67394e-07	3.32662e-05
cg12374431	25806	VAX2	0.52554	1.13025e-09	3.80985e-08	0.431364	5.53418e-08	7.15095e-06
cg12539975	59335	PRDM12	0.502103	3.28378e-08	7.64034e-07	0.516598	2.62771e-09	9.81236e-07
cg12699371	2587	GALR1	0.558172	7.93298e-10	2.80471e-08	0.492783	4.304e-07	3.10403e-05
cg12768605	284348	LYPD5	0.649589	5.35823e-06	7.29257e-05	0.657247	1.33577e-06	7.49273e-05
cg12874092	7431	VIM	0.598971	6.64519e-09	1.80769e-07	0.630645	8.54003e-10	5.01046e-07
cg12995941	3645	INSRR	0.560843	2.4254e-10	1.01839e-08	0.441465	1.75997e-06	9.09651e-05
cg13031432	65009	NDRG4	0.655676	1.2441e-11	8.49276e-10	0.605271	1.09334e-09	6.24587e-07
cg13168683	152789	JAKMIP1	0.597208	9.94902e-12	7.15144e-10	0.510214	2.15949e-08	3.66236e-06
cg13216057	27122	DKK3	0.507072	7.67377e-09	2.05657e-07	0.419194	2.96096e-07	2.40736e-05
cg13274713	6909	TBX2	0.646428	5.92439e-13	9.52642e-11	0.42896	5.97709e-07	4.09308e-05
cg13297865	6785	ELOVL4	0.674735	1.90868e-12	1.99201e-10	0.550306	1.78465e-07	1.66988e-05
cg13346411	887	CCKBR	0.636187	1.60408e-12	1.78572e-10	0.543702	4.44737e-09	1.25381e-06
cg13351583	53358	SHC3	0.519647	2.45945e-06	3.61474e-05	0.534921	1.6271e-06	8.57307e-05
cg13378388	7424	VEGFC	0.62073	1.10096e-06	1.77561e-05	0.63689	3.35594e-07	2.62999e-05
cg13436799	4036	LRP2	0.537104	6.28509e-13	9.54103e-11	0.305408	1.83025e-06	9.34849e-05
cg13488201	8038	ADAM12	0.770517	1.56244e-08	3.9439e-07	0.769131	1.88374e-08	3.37952e-06
cg13562542	2850	GPR27	0.684392	6.10125e-11	3.2542e-09	0.643317	5.90762e-09	1.54509e-06
cg13686115	84457	PHYHIPL	0.368157	1.71597e-08	4.28657e-07	0.36282	4.67394e-07	3.32662e-05
cg13749822	64399	HHIP	0.660741	1.07472e-09	3.63395e-08	0.56481	5.07446e-07	3.54201e-05
cg13756879	3481	IGF2	0.658659	1.90408e-13	5.10293e-11	0.607247	1.56967e-11	1.13582e-07
cg13878010	111	ADCY5	0.684144	9.88563e-11	4.79012e-09	0.585434	6.89699e-08	8.36424e-06
cg14046986	92241	RCSD1	0.432384	7.50151e-13	1.05742e-10	0.220934	1.06637e-07	1.16326e-05
cg14049461	2895	GRID2	0.383943	2.4254e-10	1.01839e-08	0.309782	1.13951e-06	6.57883e-05
cg14135551	23500	DAAM2	0.376093	2.36397e-06	3.49096e-05	0.406083	5.29485e-08	6.88267e-06
cg14144305	60529	ALX4	0.525896	1.15871e-07	2.3596e-06	0.529041	3.39167e-08	5.14869e-06
cg14242042	6660	SOX5	0.623066	7.16577e-10	2.58826e-08	0.635926	1.12036e-10	1.82985e-07
cg14312526	668	FOXL2	0.606919	4.67243e-14	3.53973e-11	0.404195	7.03351e-07	4.5989e-05
cg14662379	547	KIF1A	0.663917	1.24607e-13	4.1615e-11	0.485763	3.50447e-09	1.07148e-06
cg14823162	5454	POU3F2	0.463507	2.54697e-12	2.45732e-10	0.306425	1.1135e-07	1.18489e-05
cg14958635	4762	NEUROG1	0.661923	1.0569e-06	1.7173e-05	0.695589	1.49835e-08	2.98404e-06
cg15014549	55244	SLC47A1	0.600684	1.5883e-13	4.47778e-11	0.349082	4.87023e-07	3.42146e-05
cg15057581	140885	SIRPA	0.500337	8.12911e-14	3.53973e-11	0.403286	2.06348e-08	3.58352e-06
cg15107670	7490	WT1	0.640096	4.30049e-09	1.22353e-07	0.638519	2.50406e-09	9.5365e-07
cg15205507	55422	ZNF331	0.560404	1.51155e-10	6.83601e-09	0.579579	2.68785e-10	2.65218e-07
cg15461516	8534	CHST1	0.649235	5.22142e-09	1.45316e-07	0.631414	7.13006e-09	1.70087e-06
cg15565872	5806	PTX3	0.495672	4.12797e-08	9.36363e-07	0.446106	1.71025e-07	1.63551e-05
cg15640375	79948	LPPR3	0.661703	3.3933e-12	3.10809e-10	0.600413	2.99639e-11	1.30091e-07
cg15749748	140628	GATA5	0.606677	2.65053e-07	4.92617e-06	0.632375	4.05605e-08	5.75483e-06
cg15753757	26053	AUTS2	0.594548	1.32414e-13	4.16585e-11	0.347657	1.1135e-07	1.18489e-05
cg15817236	60529	ALX4	0.619586	8.04984e-09	2.14676e-07	0.628394	8.12683e-10	4.90048e-07
cg16041660	144165	PRICKLE1	0.736061	1.64278e-11	1.07091e-09	0.635644	1.32297e-07	1.35468e-05
cg16042149	4744	NEFH	0.645544	2.0682e-08	5.04454e-07	0.621301	2.20611e-07	1.96271e-05
cg16248277	2253	FGF8	0.638441	1.35983e-10	6.26735e-09	0.605408	1.97162e-08	3.47967e-06
cg16257091	627	BDNF	0.504185	4.73178e-08	1.05785e-06	0.468036	1.44571e-06	7.84589e-05
cg16584573	2253	FGF8	0.732833	1.27105e-12	1.60419e-10	0.630512	3.46525e-10	2.68656e-07
cg16604516	2199	FBLN2	0.738025	5.05704e-12	4.19001e-10	0.631001	3.80155e-07	2.86542e-05
cg16708281	200350	FOXD4L1	0.562909	2.32942e-07	4.37811e-06	0.552108	1.50461e-07	1.48464e-05
cg16852892	4325	MMP16	0.109657	3.5747e-07	6.46663e-06	0.122192	1.94295e-07	1.76475e-05
cg16884569	9770	RASSF2	0.495032	1.01468e-07	2.09579e-06	0.477835	7.03351e-07	4.5989e-05
cg16907566	7373	COL14A1	0.614799	1.959e-09	6.17212e-08	0.573165	1.01084e-06	6.04499e-05
cg16969623	55422	ZNF331	0.566658	5.00943e-10	1.92468e-08	0.548698	2.16614e-09	8.97338e-07
cg17018527	53346	TM6SF1	0.349744	8.49355e-08	1.79182e-06	0.340466	2.72299e-07	2.28227e-05
cg17108819	925	CD8A	0.725509	4.41784e-07	7.78429e-06	0.745599	5.06556e-08	6.7462e-06
cg17133183	1381	CRABP1	0.6088	3.8804e-14	3.53973e-11	0.218414	1.33577e-06	7.49273e-05
cg17188046	6862	T	0.677294	6.49238e-08	1.40235e-06	0.637401	1.90323e-06	9.60821e-05
cg17194182	2056	EPO	0.601276	2.55543e-10	1.06067e-08	0.51964	1.05209e-06	6.2231e-05
cg17503456	668	FOXL2	0.677721	2.358e-14	3.53973e-11	0.390455	2.70838e-08	4.2915e-06
cg17775235	4884	NPTX1	0.667707	9.76584e-14	3.65512e-11	0.495553	1.52884e-10	2.07425e-07
cg17834752	51305	KCNK9	0.617647	1.22302e-10	5.6851e-09	0.567038	3.64702e-07	2.81742e-05
cg17880199	4629	MYH11	0.605895	3.91014e-13	7.25481e-11	0.463522	5.06556e-08	6.7462e-06
cg18396533	143241	DYDC1	0.697118	9.70648e-08	2.01249e-06	0.678614	3.35594e-07	2.62999e-05
cg18403396	135152	B3GAT2	0.534152	7.56562e-11	3.80172e-09	0.33711	9.09544e-11	1.82985e-07
cg18581445	56961	SHD	0.522617	5.47697e-11	2.97235e-09	0.388883	3.80155e-07	2.86542e-05
cg18602314	9945	GFPT2	0.426772	2.30185e-10	9.81699e-09	0.379288	3.10035e-08	4.80731e-06
cg18938204	90187	EMILIN3	0.664896	1.07123e-08	2.78828e-07	0.703962	8.63227e-11	1.82985e-07
cg18943599	6752	SSTR2	0.23965	8.26087e-07	1.37732e-05	0.218457	3.39167e-08	5.14869e-06
cg18952560	140885	SIRPA	0.622783	3.26919e-13	6.75881e-11	0.483364	6.49091e-09	1.61959e-06
cg19063972	11166	SOX21	0.607811	6.14888e-10	2.27394e-08	0.566858	1.78465e-07	1.66988e-05
cg19141563	22843	PPM1E	0.561204	8.883e-11	4.38319e-09	0.473716	2.40012e-07	2.09263e-05
cg19332710	140730	RIMS4	0.784856	6.28509e-13	9.54103e-11	0.570224	4.4853e-07	3.22407e-05
cg19355190	1959	EGR2	0.630759	3.3933e-12	3.10809e-10	0.499377	4.87023e-07	3.42146e-05
cg19358442	60529	ALX4	0.599472	3.72982e-07	6.69148e-06	0.607534	1.56872e-08	3.01361e-06
cg19358493	2018	EMX2	0.414975	4.30049e-09	1.22353e-07	0.436026	4.05605e-08	5.75483e-06
cg19439399	6785	ELOVL4	0.53273	1.52712e-09	4.98509e-08	0.501194	1.3897e-06	7.65673e-05
cg19461621	81035	COLEC12	0.67841	1.24402e-06	1.9886e-05	0.681967	6.22586e-07	4.23671e-05
cg19674669	112937	GLB1L3	0.741499	2.16324e-09	6.71812e-08	0.689369	1.06637e-07	1.16326e-05
cg19697981	7101	NR2E1	0.576006	3.72982e-07	6.69148e-06	0.624002	5.12715e-09	1.37408e-06
cg19850348	26108	PYGO1	0.682487	1.79813e-08	4.46611e-07	0.663338	6.89699e-08	8.36424e-06
cg19917856	342897	NCCRP1	0.688159	9.74154e-09	2.5417e-07	0.66159	3.80155e-07	2.86542e-05
cg19918758	10451	VAV3	0.43688	6.24244e-06	8.32377e-05	0.464875	1.1135e-07	1.18489e-05
cg20025656	58	ACTA1	0.676895	3.59916e-08	8.30293e-07	0.682399	2.15949e-08	3.66236e-06
cg20161179	4487	MSX1	0.386589	2.53902e-07	4.73513e-06	0.398772	4.24093e-08	5.86383e-06
cg20209009	30009	TBX21	0.613651	2.05865e-09	6.46733e-08	0.641699	2.42711e-10	2.65218e-07
cg20256494	164633	CABP7	0.736581	3.91014e-13	7.25481e-11	0.593165	7.00079e-10	4.60525e-07
cg20291049	5455	POU3F3	0.770492	1.95924e-07	3.74723e-06	0.776859	7.52868e-08	8.88221e-06
cg20339230	8128	ST8SIA2	0.768959	1.68741e-09	5.41869e-08	0.797224	4.58857e-11	1.66014e-07
cg20357628	116154	PHACTR3	0.746661	6.43898e-11	3.36003e-09	0.697564	2.58875e-08	4.13211e-06
cg20530314	185	AGTR1	0.706437	7.92676e-07	1.32569e-05	0.778288	5.12715e-09	1.37408e-06
cg20624391	11149	BVES	0.598269	2.43204e-07	4.5552e-06	0.58854	2.83957e-07	2.35272e-05
cg20674577	116154	PHACTR3	0.569714	1.10096e-06	1.77561e-05	0.602389	2.27352e-09	8.97338e-07
cg20699736	25806	VAX2	0.379594	1.17768e-08	3.04347e-07	0.339962	3.39167e-08	5.14869e-06
cg20792294	51214	IGF2AS	0.711576	6.10125e-11	3.2542e-09	0.625815	9.36286e-08	1.05859e-05
cg20804555	145258	GSC	0.595673	9.3719e-11	4.5718e-09	0.619047	6.90986e-12	1.13582e-07
cg21017752	5507	PPP1R3C	0.549781	3.67662e-10	1.46444e-08	0.519881	2.83337e-08	4.42495e-06
cg21269934	339983	NAT8L	0.646693	1.22302e-10	5.6851e-09	0.621766	2.8931e-09	9.9688e-07
cg21321735	547	KIF1A	0.548957	1.73636e-11	1.12181e-09	0.299235	2.7573e-09	9.81236e-07
cg21435336	126549	ANKLE1	0.623193	1.34732e-12	1.65241e-10	0.517094	6.80319e-09	1.65937e-06
cg21513553	1292	COL6A2	0.720997	3.05482e-09	9.0717e-08	0.741644	2.68785e-10	2.65218e-07
cg21547708	6752	SSTR2	0.59871	3.78602e-06	5.3299e-05	0.634024	5.78398e-08	7.3858e-06
cg21553524	130733	TMEM178	0.528364	6.97218e-09	1.88483e-07	0.471653	1.16264e-07	1.22517e-05
cg21604803	126129	CPT1C	0.544796	6.79079e-08	1.461e-06	0.496773	1.75997e-06	9.09651e-05
cg21652958	7058	THBS2	0.447308	6.2067e-08	1.3514e-06	0.427011	4.12979e-07	3.0493e-05
cg21937886	9945	GFPT2	0.832575	1.39068e-11	9.31757e-10	0.673004	4.6355e-08	6.28921e-06
cg21942082	134526	ACOT12	0.448768	4.29282e-10	1.6882e-08	0.39049	1.979e-06	9.87589e-05
cg22007439	63951	DMRTA1	0.444665	8.34606e-10	2.9128e-08	0.373937	1.06637e-07	1.16326e-05
cg22036988	92369	SPSB4	0.69064	5.5507e-10	2.09556e-08	0.636813	1.38102e-07	1.4009e-05
cg22063989	284654	RSPO1	0.522126	7.67377e-09	2.05657e-07	0.545302	5.18667e-10	3.63201e-07
cg22123464	6543	SLC8A2	0.620207	4.09621e-09	1.17309e-07	0.537143	5.28693e-07	3.67849e-05
cg22197787	3756	KCNH1	0.246668	1.64278e-11	1.07091e-09	0.185811	4.304e-07	3.10403e-05
cg22336401	377841	ENTPD8	0.10281	8.42153e-11	4.1834e-09	0.0839426	3.80155e-07	2.86542e-05
cg22594309	127833	SYT2	0.640308	7.50151e-13	1.05742e-10	0.511127	6.89699e-08	8.36424e-06
cg22679003	1000	CDH2	0.587796	1.79615e-07	3.46893e-06	0.629104	6.19259e-09	1.58151e-06
cg22777952	27023	FOXB1	0.466028	3.18046e-11	1.90197e-09	0.351562	3.49856e-07	2.73189e-05
cg22815110	27022	FOXD3	0.698106	6.64519e-09	1.80769e-07	0.664831	1.16264e-07	1.22517e-05
cg22967284	6585	SLIT1	0.23563	9.74154e-09	2.5417e-07	0.163381	9.71148e-07	5.8398e-05
cg22975913	7490	WT1	0.487666	3.76768e-08	8.60934e-07	0.543877	2.27352e-09	8.97338e-07
cg22994720	25884	CHRDL2	0.455716	1.93759e-06	2.93314e-05	0.460347	6.0447e-08	7.58487e-06
cg23029193	133584	EGFLAM	0.49557	2.45945e-06	3.61474e-05	0.532253	3.70946e-08	5.47789e-06
cg23040064	57338	JPH3	0.548966	5.05704e-12	4.19001e-10	0.419963	4.24093e-08	5.86383e-06
cg23089840	81543	LRRC3	0.594746	1.10096e-06	1.77561e-05	0.635634	2.30124e-07	2.02249e-05
cg23166362	5293	PIK3CD	0.625726	4.17696e-11	2.37988e-09	0.36919	7.62705e-07	4.84117e-05
cg23196831	7373	COL14A1	0.613051	1.63746e-08	4.10462e-07	0.627057	3.03541e-09	9.98375e-07
cg23219720	219578	ZNF804B	0.486658	1.93759e-06	2.93314e-05	0.516556	5.78398e-08	7.3858e-06
cg23273897	4311	MME	0.46761	4.52157e-08	1.01609e-06	0.501375	2.16614e-09	8.97338e-07
cg23473904	1292	COL6A2	0.564068	7.07236e-13	1.02351e-10	0.416304	5.29485e-08	6.88267e-06
cg23582408	1917	EEF1A2	0.502223	1.88411e-08	4.65304e-07	0.49823	1.30512e-08	2.69825e-06
cg24053587	5800	PTPRO	0.377396	7.56562e-11	3.80172e-09	0.279263	1.5039e-06	8.08085e-05
cg24068372	349136	WDR86	0.811606	4.23516e-07	7.48672e-06	0.796171	8.2687e-07	5.18777e-05
cg24396745	10021	HCN4	0.673309	2.02231e-12	2.08058e-10	0.542231	6.22586e-07	4.23671e-05
cg24662718	10451	VAV3	0.733607	2.32942e-07	4.37811e-06	0.732732	1.71025e-07	1.63551e-05
cg24723331	6489	ST8SIA1	0.436594	6.99551e-06	9.23152e-05	0.485073	1.6271e-06	8.57307e-05
cg24834740	26051	PPP1R16B	0.652024	7.92676e-07	1.32569e-05	0.688093	3.70946e-08	5.47789e-06
cg24879335	7018	TF	0.574856	2.4254e-10	1.01839e-08	0.51237	8.2687e-07	5.18777e-05
cg24924779	3755	KCNG1	0.738117	1.34915e-06	2.12999e-05	0.759287	6.89699e-08	8.36424e-06
cg25014318	2740	GLP1R	0.708355	7.53986e-10	2.69646e-08	0.645331	2.20611e-07	1.96271e-05
cg25070637	6383	SDC2	0.509692	2.88792e-07	5.3083e-06	0.468323	8.96217e-07	5.52701e-05
cg25094569	7490	WT1	0.604403	6.49238e-08	1.40235e-06	0.588599	6.0447e-08	7.58487e-06
cg25167643	5803	PTPRZ1	0.751247	3.90138e-09	1.12621e-07	0.669176	1.3897e-06	7.65673e-05
cg25228126	2535	FZD2	0.554576	5.78418e-06	7.79895e-05	0.564131	7.32449e-07	4.7181e-05
cg25302419	1501	CTNND2	0.65232	2.69858e-11	1.64092e-09	0.613971	2.7573e-09	9.81236e-07
cg25332298	1995	ELAVL3	0.538152	1.6999e-12	1.87317e-10	0.46963	2.16614e-09	8.97338e-07
cg25363445	60529	ALX4	0.539253	1.71597e-08	4.28657e-07	0.531026	1.21387e-07	1.27298e-05
cg25431974	9427	ECEL1	0.858198	2.88792e-07	5.3083e-06	0.888395	1.18011e-10	1.82985e-07
cg25434223	1995	ELAVL3	0.564678	9.34658e-07	1.53476e-05	0.571077	2.50355e-07	2.15663e-05
cg25465406	3000	GUCY2D	0.596547	8.26087e-07	1.37732e-05	0.586385	9.71148e-07	5.8398e-05
cg25834568	84870	RSPO3	0.254426	6.79496e-11	3.47889e-09	0.220037	1.56872e-08	3.01361e-06
cg25875213	163115	ZNF781	0.593453	6.43898e-11	3.36003e-09	0.494878	6.75368e-07	4.4562e-05
cg25905812	1761	DMRT1	0.582498	6.49238e-08	1.40235e-06	0.586178	6.0447e-08	7.58487e-06
cg25942450	30012	TLX3	0.753196	6.00913e-06	8.06718e-05	0.775078	1.71025e-07	1.63551e-05
cg25971347	2294	FOXF1	0.585932	3.43797e-08	7.96493e-07	0.630768	1.52884e-10	2.07425e-07
cg25999867	112937	GLB1L3	0.672962	2.90842e-09	8.67252e-08	0.598009	9.71148e-07	5.8398e-05
cg26164310	9890	LPPR4	0.644144	1.93759e-06	2.93314e-05	0.632172	7.62705e-07	4.84117e-05
cg26195812	56896	DPYSL5	0.777504	5.98011e-14	3.53973e-11	0.601124	4.66359e-09	1.28148e-06
cg26232187	4916	NTRK3	0.269174	1.57587e-07	3.09863e-06	0.30356	6.66045e-10	4.51828e-07
cg26365854	60529	ALX4	0.637719	2.76677e-07	5.10289e-06	0.671463	3.18453e-09	1.01661e-06
cg26466094	26289	AK5	0.513321	1.64622e-07	3.21368e-06	0.516554	7.86519e-08	9.17944e-06
cg26525091	8174	MADCAM1	0.605736	2.0682e-08	5.04454e-07	0.600387	2.06371e-09	8.97338e-07
cg26557658	163933	FAM43B	0.539373	1.50842e-07	2.98223e-06	0.555368	7.83025e-09	1.82773e-06
cg26607785	30009	TBX21	0.557667	2.04955e-11	1.29336e-09	0.416987	1.28386e-06	7.31495e-05
cg26702254	3751	KCND2	0.458909	7.42797e-08	1.58551e-06	0.429227	7.32449e-07	4.7181e-05
cg26705553	64386	MMP25	0.47151	1.79615e-07	3.46893e-06	0.474037	3.21894e-07	2.57848e-05
cg26747293	133584	EGFLAM	0.682179	3.71558e-09	1.07831e-07	0.693926	1.69916e-09	8.19672e-07
cg26756083	4325	MMP16	0.573372	3.76768e-08	8.60934e-07	0.563354	7.86519e-08	9.17944e-06
cg27138584	56660	KCNK12	0.414974	5.84232e-10	2.18664e-08	0.368032	1.79966e-08	3.25559e-06
cg27196745	5800	PTPRO	0.733618	2.4254e-10	1.01839e-08	0.698217	2.7573e-09	9.81236e-07
cg27286999	10439	OLFM1	0.391104	3.76768e-08	8.60934e-07	0.43451	1.18011e-10	1.82985e-07
cg27319898	219578	ZNF804B	0.631203	4.41784e-07	7.78429e-06	0.642572	8.21625e-08	9.48714e-06
cg27320127	56660	KCNK12	0.515857	3.01115e-11	1.81069e-09	0.459304	4.24093e-08	5.86383e-06
cg27351358	627	BDNF	0.492425	6.73532e-06	8.91527e-05	0.513803	6.89699e-08	8.36424e-06
cg27376271	147381	CBLN2	0.288676	2.38817e-09	7.31205e-08	0.222822	1.06637e-07	1.16326e-05
