# Supplementary material for: Genome-scale analysis of aberrant DNA methylation in colorectal cancer
Source: HighWire-hosted journal article supplement (doi:10.1101/gr.117523.110), 2011-06-09
Supplement: Hinoue_Supplemental_Table3.xlsx [file Hinoue_Supplemental_Table3.xlsx]

## Sheet: Supplemental Table 3
Supplemental Table 3 - Twenty CpG sites associated with KRAS mutant tumors based on P value >0.05 and mean DNA methylation β-value difference >0.20
		−log10 (FDR adjusted P value)		Difference in mean DNA methylation value
Probe ID	Gene Symbol	KRAS-M (34) vs. BRAF/KRAS-WT (74)	CIMP-L (29) vs. Non-CIMP (68)	KRAS-M (34) vs. BRAF/KRAS-WT (74)	CIMP-L (29) vs. Non-CIMP (68)
cg23040064	JPH3	2.93656	5.23182	0.23152	0.261502
cg09053680	UTF1	1.89033	4.38795	0.292766	0.336313
cg07028533	CNTNAP2	1.81593	3.20448	0.211118	0.225242
cg25302419	CTNND2	1.8064	6.00823	0.237823	0.37495
cg16969623	ZNF331	1.8064	6.04704	0.225827	0.342601
cg13756879	IGF2	1.75783	6.94469	0.212586	0.368488
cg16041660	PRICKLE1	1.75094	4.86816	0.267694	0.335594
cg13168683	JAKMIP1	1.6556	5.43624	0.2189	0.343522
cg04713521	PRRX2	1.65488	6.31909	0.20094	0.342083
cg01322134	WNT3A	1.65488	6.15163	0.230503	0.395915
cg01519742	JAKMIP1	1.63756	5.89229	0.280837	0.420167
cg26747293	EGFLAM	1.51051	6.08636	0.224023	0.388644
cg26195812	DPYSL5	1.50979	5.89229	0.218727	0.364956
cg03168582	DMRT1	1.50809	4.86816	0.224977	0.333852
cg27420236	RPRM	1.50442	2.94899	0.219613	0.238182
cg00687686	NDRG4	1.4647	6.5708	0.209478	0.38602
cg13031432	NDRG4	1.44907	6.20441	0.213712	0.408478
cg12874092	VIM	1.44276	6.30012	0.208697	0.391177
cg01049530	BMP3	1.44276	2.11199	0.243846	0.283798
cg01557297	SLC22A17	1.37358	3.78053	0.215567	0.282049
cg02748539	SLC9A3	1.34935	5.35409	0.209183	0.365529
cg25157874	QKI	1.3283	2.43711	0.203374	0.250947
