# Supplementary material for: Genome-scale analysis of aberrant DNA methylation in colorectal cancer
Source: HighWire-hosted journal article supplement (doi:10.1101/gr.117523.110), 2011-06-09
Supplement: Hinoue_Supplemental_Table4.xlsx [file Hinoue_Supplemental_Table4.xlsx]

## Sheet: CIMP-H
Supplemental Table 4 - Gene promoter classification among colorectal samples
Probe ID	Gene Symbol	Gene ID	CIMP-H mean beta-value	CIMP-H vs. nonCIMP FDR-adjusted P value	CIMP-L mean beta-value	CIMP-L vs. nonCIMP FDR-adjusted P value	ES cell histone marks	Gene category
cg02873524	PAPPA	5069	0.537983	3.85162e-11	0.205912	0.0562572	K4+K27	CIMP-H
cg03447931	BMP6	654	0.579274	3.85162e-11	0.162477	0.234516	K4+K27	CIMP-H
cg06638966	COL19A1	1310	0.520024	3.85162e-11	0.217811	0.395702	K4+K27	CIMP-H
cg06954481	GBX2	2637	0.79096	3.85162e-11	0.343864	0.0978591	K4+K27	CIMP-H
cg16778809	ADAM23	8745	0.753454	3.85162e-11	0.336432	0.0742268	K4+K27	CIMP-H
cg17497271	GPR176	11245	0.588961	3.85162e-11	0.179575	0.336063	K4	CIMP-H
cg19283196	SLC10A4	201780	0.531024	3.85162e-11	0.272894	0.0994088	K4+K27	CIMP-H
cg21665000	MYOCD	93649	0.465147	3.85162e-11	0.0862757	0.789845	K4	CIMP-H
cg24317255	RGS17	26575	0.525613	3.85162e-11	0.183173	0.242397	K4+K27	CIMP-H
cg24686358	COL9A2	1298	0.574371	3.85162e-11	0.191569	0.806529	K4+K27	CIMP-H
cg26359204	NKX6-1	4825	0.383895	3.85162e-11	0.0819671	0.63009	K4+K27	CIMP-H
cg27049761	B3GNT4	79369	0.634728	3.85162e-11	0.289228	0.0670187	K4+K27	CIMP-H
cg19219437	PCOLCE2	26577	0.53938	4.34965e-11	0.120116	0.635983	K4	CIMP-H
cg06638433	IGF2BP1	10642	0.561137	4.37058e-11	0.174635	0.923977	K4	CIMP-H
cg15613048	KIF17	57576	0.625296	4.37058e-11	0.247231	0.110225	K4	CIMP-H
cg04528819	KLF14	136259	0.535965	4.65241e-11	0.219053	0.0636262	K4+K27	CIMP-H
cg14223995	UCP1	7350	0.641133	4.93361e-11	0.168934	0.635983	K4+K27	CIMP-H
cg22619563	EPHA3	2042	0.276838	4.93361e-11	0.123174	0.0530267	K4+K27	CIMP-H
cg23391006	OXTR	5021	0.348771	4.93361e-11	0.0632479	0.447834	K4+K27	CIMP-H
cg06379754	CACNA2D1	781	0.518398	5.08719e-11	0.154303	0.693029	NA	CIMP-H
cg18618334	CXCL12	6387	0.575607	5.65732e-11	0.306153	0.352985	NA	CIMP-H
cg06836772	PRKAA2	5563	0.563384	6.40676e-11	0.215273	0.105927	NA	CIMP-H
cg15980408	TMEM22	80723	0.578453	6.53521e-11	0.134784	0.514813	K4	CIMP-H
cg22469841	FSTL1	11167	0.515214	6.66705e-11	0.0841031	0.252964	K4	CIMP-H
cg06055013	ATRNL1	26033	0.51646	6.91422e-11	0.184163	0.0865032	K4+K27	CIMP-H
cg18815943	FOXE3	2301	0.618837	6.91422e-11	0.162553	0.600214	K27	CIMP-H
cg09339301	QKI	9444	0.698778	7.25643e-11	0.299565	0.228927	K4	CIMP-H
cg09881855	SNAI2	6591	0.493907	7.36501e-11	0.180851	0.606995	NA	CIMP-H
cg07965823	ISM2	145501	0.705351	8.01618e-11	0.231069	0.291529	K4+K27	CIMP-H
cg25735280	PDZD2	23037	0.362539	8.01618e-11	0.054637	0.64934	NA	CIMP-H
cg01425670	NEGR1	257194	0.370601	8.4238e-11	0.0812534	0.165515	NA	CIMP-H
cg24493940	MMP17	4326	0.405139	8.7665e-11	0.165234	0.226318	K4+K27	CIMP-H
cg04993257	PLAC2	257000	0.598184	8.95543e-11	0.361318	0.107269	NA	CIMP-H
cg02867079	HHIPL1	84439	0.452793	1.07376e-10	0.179667	0.0530267	K4	CIMP-H
cg07336230	KIF6	221458	0.459214	1.07376e-10	0.164086	0.0657409	K4	CIMP-H
cg07850604	INSM2	84684	0.501146	1.07376e-10	0.19345	0.118077	K4+K27	CIMP-H
cg25917510	HOXC8	3224	0.599472	1.07376e-10	0.206249	0.346507	K27	CIMP-H
cg17398595	SH3GL2	6456	0.628862	1.11128e-10	0.228398	0.879151	K4+K27	CIMP-H
cg25301180	ERC2	26059	0.472239	1.15072e-10	0.166661	0.3811	K4	CIMP-H
cg12373771	CECR6	27439	0.655774	1.18299e-10	0.255942	0.29838	None	CIMP-H
cg06763078	KCNC1	3746	0.588216	1.27195e-10	0.0370503	0.500043	NA	CIMP-H
cg25097436	RTN1	6252	0.566746	1.27195e-10	0.182682	0.216482	K4+K27	CIMP-H
cg08997253	GRIN3A	116443	0.458883	1.40963e-10	0.143718	0.219575	K4+K27	CIMP-H
cg09754413	RNF182	221687	0.49449	1.78478e-10	0.169806	0.482448	K4+K27	CIMP-H
cg08179907	RAB39	54734	0.537901	1.82923e-10	0.121499	0.473441	K4	CIMP-H
cg23698058	PRKACB	5567	0.583223	1.82923e-10	0.160549	0.121449	K4	CIMP-H
cg26491213	SIX3	6496	0.297588	1.82923e-10	0.0821317	0.87574	K4+K27	CIMP-H
cg15447479	SMO	6608	0.635429	1.96391e-10	0.282896	0.0657409	K4	CIMP-H
cg20123891	NXPH3	11248	0.476204	1.96391e-10	0.269698	0.118077	K4+K27	CIMP-H
cg25462291	HEYL	26508	0.596168	1.96391e-10	0.258003	0.242397	K4+K27	CIMP-H
cg10613381	UPB1	51733	0.766756	2.0052e-10	0.593593	0.0729803	NA	CIMP-H
cg05881135	SYNM	23336	0.519063	2.14704e-10	0.0900605	0.57568	K4+K27	CIMP-H
cg06222851	OGDHL	55753	0.651987	2.14704e-10	0.111437	0.884142	K4	CIMP-H
cg10692870	FN1	2335	0.389801	2.14704e-10	0.128421	0.460934	K4	CIMP-H
cg22886089	SCG3	29106	0.478006	2.14704e-10	0.0879927	0.765134	K4	CIMP-H
cg21296230	GREM1	26585	0.540509	2.236e-10	0.267248	0.271336	K4+K27	CIMP-H
cg23214267	EYA2	2139	0.299444	2.34234e-10	0.0994327	0.375971	K4+K27	CIMP-H
cg06866657	LHX6	26468	0.371795	2.57092e-10	0.162722	0.17988	K4+K27	CIMP-H
cg16632715	HOXD11	3237	0.436447	2.66456e-10	0.201019	0.460934	K27	CIMP-H
cg21229859	MYEF2	50804	0.420655	2.77742e-10	0.123676	0.192193	K4	CIMP-H
cg05098471	MEIS1	4211	0.475146	3.03504e-10	0.122313	0.11321	K4+K27	CIMP-H
cg10720654	PTENP1	11191	0.570621	3.35179e-10	0.403807	0.192193	NA	CIMP-H
cg26096837	FGF19	9965	0.534189	3.35179e-10	0.349155	0.144911	NA	CIMP-H
cg02780295	PCDHGC3	5098	0.607929	3.4783e-10	0.342201	0.0512099	K4+K27	CIMP-H
cg16944093	LIMS2	55679	0.607686	3.78595e-10	0.448032	0.137009	K4+K27	CIMP-H
cg25835225	ZNF350	59348	0.433439	3.78595e-10	0.189877	0.0703668	K4	CIMP-H
cg12220493	NKX2-1	7080	0.469789	3.95073e-10	0.132189	0.0978591	NA	CIMP-H
cg17460095	FERMT2	10979	0.381607	3.95073e-10	0.0604751	0.559417	K4	CIMP-H
cg27426707	CACNA1G	8913	0.417967	3.95073e-10	0.186326	0.186691	K4+K27	CIMP-H
cg05647859	LIN7A	8825	0.686685	4.62024e-10	0.373972	0.0538115	K4	CIMP-H
cg02548238	LOX	4015	0.508315	4.77762e-10	0.0627146	0.968542	K4+K27	CIMP-H
cg09872233	ALOX15	246	0.539044	4.98759e-10	0.189376	0.118077	NA	CIMP-H
cg24975564	PDE3A	5139	0.418016	6.03493e-10	0.142965	0.118077	K4	CIMP-H
cg05016953	SLC6A4	6532	0.426616	6.19504e-10	0.0288113	0.900492	K27	CIMP-H
cg17252960	ID4	3400	0.596229	6.19504e-10	0.272097	0.496412	K4	CIMP-H
cg21965997	CALY	50632	0.522416	6.19504e-10	0.219444	0.116842	K27	CIMP-H
cg23423382	ZNF287	57336	0.478048	6.19504e-10	0.204617	0.123105	K4+K27	CIMP-H
cg18695917	FSTL5	56884	0.443918	6.81772e-10	0.195587	0.17988	K4	CIMP-H
cg07684796	DKK1	22943	0.527348	7.50318e-10	0.239862	0.437322	K4+K27	CIMP-H
cg09068492	CALCA	796	0.509684	8.22439e-10	0.227162	0.915554	K4+K27	CIMP-H
cg09156233	BMPR1B	658	0.543916	8.22439e-10	0.149511	0.245123	K4+K27	CIMP-H
cg25361106	TLX2	3196	0.334371	8.22439e-10	0.109315	0.539465	NA	CIMP-H
cg18956481	CYP24A1	1591	0.702713	9.0163e-10	0.348564	0.580384	K4+K27	CIMP-H
cg23828595	PRKG1	5592	0.426582	9.0163e-10	0.0947755	0.332891	NA	CIMP-H
cg06994747	ADAMTS10	81794	0.408648	9.34941e-10	0.113167	0.504525	K4	CIMP-H
cg07558455	KANK4	163782	0.552625	9.34941e-10	0.140741	0.338473	K4+K27	CIMP-H
cg12717594	RECK	8434	0.4897	9.34941e-10	0.128234	0.226318	K4	CIMP-H
cg20673481	KCNS3	3790	0.483524	9.34941e-10	0.198208	0.245123	K4	CIMP-H
cg01530101	KCNQ1DN	55539	0.716893	9.77216e-10	0.451548	0.0742268	NA	CIMP-H
cg02515725	PDLIM3	27295	0.543287	9.77216e-10	0.162859	0.476611	K4	CIMP-H
cg22334000	C4orf22	255119	0.440488	9.77216e-10	0.0875055	0.75126	K4+K27	CIMP-H
cg14436761	RAMP2	10266	0.63048	1.07586e-09	0.318822	0.17988	K4	CIMP-H
cg09722397	GRIN2C	2905	0.435938	1.28975e-09	0.0837599	0.615507	K4+K27	CIMP-H
cg01836044	PCDH20	64881	0.40975	1.48999e-09	0.197947	0.207952	K4+K27	CIMP-H
cg11832722	DSC3	1825	0.612734	1.64612e-09	0.175598	0.907326	K4+K27	CIMP-H
cg19803671	UBE2E2	7325	0.304703	1.64612e-09	0.0583286	0.983108	K4	CIMP-H
cg08918749	LPL	4023	0.603861	1.71516e-09	0.372761	0.271336	K4+K27	CIMP-H
cg14133708	EMILIN2	84034	0.507823	1.88818e-09	0.198179	0.110225	K4+K27	CIMP-H
cg07623294	ELAVL2	1993	0.249202	1.98781e-09	0.119668	0.0876832	K4+K27	CIMP-H
cg01899253	FLT1	2321	0.50483	2.0926e-09	0.274494	0.724092	NA	CIMP-H
cg24371225	MGC42105	167359	0.47491	2.30315e-09	0.170869	0.0876832	K4+K27	CIMP-H
cg26090652	C1QTNF5	114902	0.499591	2.30315e-09	0.181569	0.635983	K4+K27	CIMP-H
cg12515638	SFRP4	6424	0.494481	2.40818e-09	0.231682	0.146401	K4+K27	CIMP-H
cg24003542	MCC	4163	0.384624	2.51808e-09	0.100789	0.0828453	K4+K27	CIMP-H
cg24265806	FAM126A	84668	0.431116	2.51808e-09	0.055284	0.75126	K4	CIMP-H
cg00308133	GAMT	2593	0.458539	2.64167e-09	0.0699542	0.6426	K4	CIMP-H
cg07212894	SLC38A3	10991	0.444778	2.64167e-09	0.101553	0.161372	K4+K27	CIMP-H
cg15757271	WNT5A	7474	0.29525	2.74461e-09	0.0310664	0.656587	K4+K27	CIMP-H
cg24417499	HPCA	3208	0.50298	2.74461e-09	0.277434	0.63009	K4	CIMP-H
cg18438777	NPY5R	4889	0.654564	2.88857e-09	0.234401	0.968542	K4+K27	CIMP-H
cg09536738	EFHD1	80303	0.439479	3.01114e-09	0.261175	0.469892	K4+K27	CIMP-H
cg23559331	KCNH4	23415	0.561631	3.01114e-09	0.177833	0.189879	K4	CIMP-H
cg24273512	POPDC3	64208	0.427672	3.1589e-09	0.228599	0.0636262	K4	CIMP-H
cg25484904	CWH43	80157	0.643998	3.1589e-09	0.324418	0.87574	K4+K27	CIMP-H
cg15075170	TMEFF1	8577	0.649773	3.27304e-09	0.0531064	0.559417	K4	CIMP-H
cg19037167	TLR2	7097	0.447088	3.27304e-09	0.0754595	0.776467	K4+K27	CIMP-H
cg21801378	BRUNOL6	60677	0.487175	3.27304e-09	0.0904527	0.884142	K4+K27	CIMP-H
cg23699324	CTNNA2	1496	0.481459	3.42327e-09	0.337989	0.0742268	K4	CIMP-H
cg07102705	HTR4	3360	0.556409	3.75621e-09	0.206253	0.3811	K4+K27	CIMP-H
cg09068528	ACADL	33	0.570289	3.75621e-09	0.234532	0.156887	K4+K27	CIMP-H
cg25680829	LHX4	89884	0.35544	3.75621e-09	0.13654	0.656587	NA	CIMP-H
cg00282347	CHD5	26038	0.461361	3.87113e-09	0.192862	0.408234	NA	CIMP-H
cg20051033	CPNE9	151835	0.345819	3.87113e-09	0.0621957	0.846129	K4	CIMP-H
cg24014661	TCTE1	202500	0.308356	3.87113e-09	0.0257003	0.856395	K4	CIMP-H
cg04324308	COL4A3	1285	0.531229	4.02611e-09	0.0611189	0.884142	K4+K27	CIMP-H
cg16539629	C14orf132	56967	0.630672	4.02611e-09	0.324028	0.0512099	NA	CIMP-H
cg07674153	TSHR	7253	0.276607	4.83613e-09	0.119127	0.319576	K4+K27	CIMP-H
cg02886284	CPE	1363	0.528579	5.27839e-09	0.133259	0.268105	K4+K27	CIMP-H
cg06150468	BATF3	55509	0.355632	5.27839e-09	0.0716593	0.11321	NA	CIMP-H
cg08186362	HRH3	11255	0.587319	5.27839e-09	0.142675	0.646247	K4+K27	CIMP-H
cg16063112	C10orf107	219621	0.474183	5.27839e-09	0.18979	0.920248	K4	CIMP-H
cg11932564	TNFRSF13C	115650	0.391662	5.52222e-09	0.108547	0.196664	K4+K27	CIMP-H
cg26057752	PGAM2	5224	0.619744	5.79298e-09	0.3465	0.942796	K4	CIMP-H
cg04473302	SLC26A4	5172	0.232823	6.04423e-09	0.0518886	0.767432	K4+K27	CIMP-H
cg08785534	GAL	51083	0.356718	6.04423e-09	0.152557	0.414826	K4	CIMP-H
cg04001333	FLVCR2	55640	0.628893	6.27342e-09	0.315826	0.826716	K4	CIMP-H
cg12422450	CHGA	1113	0.695075	6.27342e-09	0.418851	0.0626229	K4	CIMP-H
cg19378133	A2BP1	54715	0.548116	6.56367e-09	0.309701	0.37259	K4+K27	CIMP-H
cg25010118	DSEL	92126	0.606701	7.24101e-09	0.155099	0.884142	K4	CIMP-H
cg25179291	FNBP1	23048	0.446124	7.5755e-09	0.0456663	0.747666	K4	CIMP-H
cg25211525	C6orf145	221749	0.645873	7.5755e-09	0.082964	0.859577	K4	CIMP-H
cg24794531	TRPC1	7220	0.482834	7.94574e-09	0.18828	0.418483	K4	CIMP-H
cg06722216	NOL4	8715	0.46317	8.35508e-09	0.118094	0.704051	K4+K27	CIMP-H
cg04623955	DIO3	1735	0.504665	8.785e-09	0.217706	0.920248	NA	CIMP-H
cg13619915	SLITRK3	22865	0.472273	9.16654e-09	0.110742	0.170568	K4+K27	CIMP-H
cg07634191	SCARA5	286133	0.463427	9.51743e-09	0.156438	0.717373	None	CIMP-H
cg14831838	CDK5R2	8941	0.461228	9.51743e-09	0.0930647	0.633316	K4+K27	CIMP-H
cg09017174	SLC1A2	6506	0.463283	1.0006e-08	0.310842	0.118077	K4+K27	CIMP-H
cg01226811	KCNJ8	3764	0.422692	1.03904e-08	0.138966	0.566573	K4+K27	CIMP-H
cg09892203	CACNG4	27092	0.260043	1.03904e-08	0.0590957	0.57568	K4+K27	CIMP-H
cg15105703	DUOXA1	90527	0.443342	1.08962e-08	0.0965526	0.892169	K4+K27	CIMP-H
cg07744166	WASF3	10810	0.467992	1.18671e-08	0.311349	0.0682639	K4+K27	CIMP-H
cg16158681	MT3	4504	0.560109	1.23851e-08	0.385803	0.0512099	K4+K27	CIMP-H
cg16793061	EYA1	2138	0.364933	1.23851e-08	0.0914323	0.336063	K4	CIMP-H
cg03751813	ZNF585B	92285	0.425324	1.28957e-08	0.13421	0.786538	None	CIMP-H
cg21948783	WNT1	7471	0.541568	1.34908e-08	0.203279	0.659964	K4+K27	CIMP-H
cg20557202	SLC5A5	6528	0.311885	1.41457e-08	0.151458	0.0850428	K27	CIMP-H
cg10182321	STK32B	55351	0.422558	1.47638e-08	0.219645	0.0503741	NA	CIMP-H
cg12770741	NXN	64359	0.707371	1.47638e-08	0.487358	0.986401	NA	CIMP-H
cg20937139	PDGFC	56034	0.626414	1.47638e-08	0.195072	0.668364	K4	CIMP-H
cg08126211	KAAG1	353219	0.40568	1.55149e-08	0.15716	0.988924	K4	CIMP-H
cg08030082	POMC	5443	0.730614	1.62292e-08	0.605331	0.0512099	K4+K27	CIMP-H
cg25920792	HTRA1	5654	0.471821	1.70145e-08	0.14645	0.421769	K4+K27	CIMP-H
cg16358826	GABRA4	2557	0.383564	1.86985e-08	0.239966	0.0711639	NA	CIMP-H
cg26465611	MEGF10	84466	0.643637	1.86985e-08	0.482106	0.0790769	K4	CIMP-H
cg12858460	EOMES	8320	0.501421	2.05001e-08	0.237473	0.356482	K4+K27	CIMP-H
cg06637774	P2RY6	5031	0.617476	2.14875e-08	0.247685	0.902865	K27	CIMP-H
cg18119529	ZNF114	163071	0.267087	2.25711e-08	0.160419	0.288831	K4	CIMP-H
cg09649610	GNG4	2786	0.659157	2.33999e-08	0.259772	0.395702	K4	CIMP-H
cg14155416	L3MBTL4	91133	0.542303	2.33999e-08	0.302691	0.388121	K4+K27	CIMP-H
cg17054360	MTERF	7978	0.423222	2.33999e-08	0.284723	0.0670187	K4	CIMP-H
cg05860890	KCNV1	27012	0.451423	2.45777e-08	0.141347	0.456769	K4+K27	CIMP-H
cg23495733	CPNE8	144402	0.479745	2.57025e-08	0.217143	0.0962705	K4	CIMP-H
cg22377389	GJB6	10804	0.581085	2.68209e-08	0.248433	0.96321	NA	CIMP-H
cg04747322	SNCAIP	9627	0.515408	2.79883e-08	0.317929	0.100853	NA	CIMP-H
cg09038885	ADRA1B	147	0.280796	2.79883e-08	0.0491204	0.984891	NA	CIMP-H
cg23472215	GSTM3	2947	0.576115	2.79883e-08	0.170186	0.75126	K4+K27	CIMP-H
cg04624659	SPAG17	200162	0.471354	3.18055e-08	0.256431	0.309637	K4	CIMP-H
cg00247489	CR2	1380	0.297548	3.3123e-08	0.0748612	0.264727	K4+K27	CIMP-H
cg05674944	SLC30A2	7780	0.517171	3.3123e-08	0.113356	0.721312	K4+K27	CIMP-H
cg22578204	TIMP3	7078	0.471949	3.3123e-08	0.214577	0.707805	K4	CIMP-H
cg18275051	CYB5R1	51706	0.497059	3.44965e-08	0.234777	0.250135	NA	CIMP-H
cg01144286	C20orf103	24141	0.44746	3.62174e-08	0.267525	0.0562572	K4+K27	CIMP-H
cg00892798	NGFR	4804	0.465599	3.79458e-08	0.185944	0.234516	K4+K27	CIMP-H
cg00910067	SLC7A10	56301	0.372027	3.96756e-08	0.113458	0.714097	NA	CIMP-H
cg14917512	GNA11	2767	0.524405	3.96756e-08	0.209228	0.88546	K4	CIMP-H
cg07540118	ADAM19	8728	0.417741	4.1157e-08	0.1432	0.668364	K4+K27	CIMP-H
cg27152280	NRG2	9542	0.313695	4.1157e-08	0.0588269	0.656587	K4+K27	CIMP-H
cg14939652	NPAS3	64067	0.347357	5.21114e-08	0.11744	0.543776	NA	CIMP-H
cg25416372	S1PR5	53637	0.338235	5.21114e-08	0.104314	0.250135	K4+K27	CIMP-H
cg27094076	ZPBP	11055	0.318974	5.70512e-08	0.156162	0.231392	K4	CIMP-H
cg09134003	NEUROG2	63973	0.501791	5.95201e-08	0.0432338	0.737007	K4+K27	CIMP-H
cg04683240	HLX	3142	0.529358	6.19786e-08	0.109999	0.950121	K4+K27	CIMP-H
cg16003238	IGDCC3	9543	0.68315	6.19786e-08	0.485279	0.742773	K4+K27	CIMP-H
cg16731240	ZNF577	84765	0.661481	6.19786e-08	0.380455	0.622837	K4	CIMP-H
cg07621046	C10orf82	143379	0.656573	6.47821e-08	0.370589	0.979609	K4	CIMP-H
cg12379775	NCRNA00176	284739	0.478618	6.78365e-08	0.153545	0.832236	K4	CIMP-H
cg14894144	LAMA3	3909	0.695577	6.78365e-08	0.424367	0.952168	K4+K27	CIMP-H
cg04686412	PSD2	84249	0.464125	7.03773e-08	0.272627	0.0962705	K4+K27	CIMP-H
cg12839593	SIX1	6495	0.533602	7.03773e-08	0.169138	0.865618	K4+K27	CIMP-H
cg20647888	CCDC3	83643	0.589871	7.03773e-08	0.257058	0.773146	K4+K27	CIMP-H
cg21246783	CLGN	1047	0.365779	7.03773e-08	0.096018	0.539465	K4+K27	CIMP-H
cg00059225	GLRA1	2741	0.587987	7.36907e-08	0.446612	0.398933	K4	CIMP-H
cg07038400	PPP2R3A	5523	0.482697	7.72975e-08	0.249398	0.659964	K4	CIMP-H
cg00884221	IGFBP7	3490	0.350776	8.03417e-08	0.106815	0.971064	K4+K27	CIMP-H
cg02995295	FAM124A	220108	0.429715	8.03417e-08	0.136341	0.618807	K4	CIMP-H
cg24824266	SV2B	9899	0.407033	8.03417e-08	0.195434	0.13323	NA	CIMP-H
cg22614355	HTR6	3362	0.278805	8.39617e-08	0.058229	0.906006	NA	CIMP-H
cg09082287	DNAJC6	9829	0.513532	8.74285e-08	0.312693	0.0657409	K4	CIMP-H
cg16111791	CACNB4	785	0.40041	8.74285e-08	0.10454	0.460934	K4+K27	CIMP-H
cg25511429	NRN1	51299	0.450456	8.74285e-08	0.307772	0.24725	K4+K27	CIMP-H
cg10604168	RASL12	51285	0.543189	9.58104e-08	0.187145	0.830102	K4	CIMP-H
cg12053284	SYT4	6860	0.401735	9.58104e-08	0.126328	0.550465	K4	CIMP-H
cg13904771	C10orf47	254427	0.312357	9.58104e-08	0.0266573	0.583801	K4	CIMP-H
cg15457899	SCN3B	55800	0.295948	9.58104e-08	0.131246	0.960483	K4+K27	CIMP-H
cg25725843	ST6GAL2	84620	0.50268	9.97616e-08	0.385928	0.0850428	NA	CIMP-H
cg27603796	CTTNBP2	83992	0.422631	9.97616e-08	0.126132	0.934497	K4	CIMP-H
cg04499325	EPDR1	54749	0.560804	1.08916e-07	0.202438	0.910073	K4+K27	CIMP-H
cg19187185	RRAGD	58528	0.3498	1.19099e-07	0.118846	0.868315	NA	CIMP-H
cg07393322	A4GALT	53947	0.376191	1.24002e-07	0.138966	0.852453	K4	CIMP-H
cg25870420	ITGA9	3680	0.553736	1.24002e-07	0.160607	0.606995	K4+K27	CIMP-H
cg17729667	NINL	22981	0.531619	1.29326e-07	0.356062	0.0865032	K4	CIMP-H
cg03213216	FLJ40125	147699	0.280566	1.35105e-07	0.0949268	0.226318	K4	CIMP-H
cg23614979	NAV2	89797	0.355491	1.40664e-07	0.10843	0.0779206	K4+K27	CIMP-H
cg04515001	DCDC2	51473	0.443018	1.46696e-07	0.127132	0.559417	K4	CIMP-H
cg09893305	HAPLN1	1404	0.621907	1.46696e-07	0.399313	0.945337	K4+K27	CIMP-H
cg14443380	SEMA7A	8482	0.376298	1.60594e-07	0.0652631	0.0850428	K4	CIMP-H
cg08223748	MEF2C	4208	0.307202	1.67463e-07	0.0323585	0.285213	K4+K27	CIMP-H
cg00830029	NRIP2	83714	0.667831	1.74909e-07	0.378905	0.876818	K4	CIMP-H
cg07849904	MN1	4330	0.328355	1.74909e-07	0.10386	0.518414	K4+K27	CIMP-H
cg01301664	FST	10468	0.340913	1.82976e-07	0.107131	0.840391	NA	CIMP-H
cg09350274	GFRA3	2676	0.55974	1.91095e-07	0.315961	0.482448	K4+K27	CIMP-H
cg27327588	ZNF345	25850	0.416182	1.91095e-07	0.159108	0.440994	K4	CIMP-H
cg13614181	C13orf15	28984	0.357247	1.99566e-07	0.223136	0.0790769	K4+K27	CIMP-H
cg08221207	FEZ1	9638	0.255181	2.25808e-07	0.0778323	0.291529	K4+K27	CIMP-H
cg22882178	PITX3	5309	0.376511	2.25808e-07	0.140063	0.250135	K4+K27	CIMP-H
cg03310469	SIX2	10736	0.421649	2.91176e-07	0.0824092	0.86331	K4+K27	CIMP-H
cg04628008	ZBTB16	7704	0.310855	2.91176e-07	0.0587677	0.615507	K4+K27	CIMP-H
cg09010998	ZEB1	6935	0.404992	2.91176e-07	0.154616	0.887993	K4	CIMP-H
cg20449692	CLDN11	5010	0.702233	3.03975e-07	0.480932	0.24725	K4	CIMP-H
cg01868782	HEY2	23493	0.351292	3.82364e-07	0.111425	0.917966	K4+K27	CIMP-H
cg22634689	TMEM121	80757	0.363823	3.82364e-07	0.158156	0.0603037	K4+K27	CIMP-H
cg04113075	RAB32	10981	0.346984	3.99641e-07	0.133872	0.968542	K4	CIMP-H
cg21815667	HOXD8	3234	0.409719	3.99641e-07	0.242902	0.401791	NA	CIMP-H
cg27154163	KIT	3815	0.316187	4.55473e-07	0.0711395	0.162926	K4	CIMP-H
cg09137696	MT1A	4489	0.402031	4.75953e-07	0.107488	0.839068	K4+K27	CIMP-H
cg02564523	ORAI2	80228	0.512207	4.95858e-07	0.202455	0.773146	K4	CIMP-H
cg06981182	RNLS	55328	0.537521	4.95858e-07	0.298896	0.405198	K4	CIMP-H
cg12973651	CNFN	84518	0.39887	5.18102e-07	0.156563	0.852453	None	CIMP-H
cg20550118	CRABP1	1381	0.398974	5.3894e-07	0.205504	0.988924	K4	CIMP-H
cg13849691	ACSL5	51703	0.850625	5.62243e-07	0.630374	0.972376	NA	CIMP-H
cg22736354	NHLRC1	378884	0.580252	5.62243e-07	0.343161	0.946792	K4	CIMP-H
cg00720137	DYNLRB2	83657	0.506532	5.86527e-07	0.147704	0.252964	K4	CIMP-H
cg11191210	VGLL2	245806	0.527421	5.86527e-07	0.362646	0.140756	NA	CIMP-H
cg06493994	SCGN	10590	0.322734	6.09197e-07	0.145799	0.765134	K4+K27	CIMP-H
cg20544605	SORBS2	8470	0.718037	6.09197e-07	0.483991	0.925752	None	CIMP-H
cg27239157	MCF2L2	23101	0.372837	6.09197e-07	0.188623	0.0925915	K4+K27	CIMP-H
cg06374075	ADAM11	4185	0.379625	6.34557e-07	0.173625	0.865618	K4+K27	CIMP-H
cg21602520	BCL2	596	0.494336	6.34557e-07	0.207077	0.983108	K4+K27	CIMP-H
cg00893636	EPM2AIP1	9852	0.249233	6.60952e-07	0.018287	0.865618	K4	CIMP-H
cg17561435	BMPER	168667	0.516752	6.60952e-07	0.132182	0.939767	K4+K27	CIMP-H
cg10154926	HAP1	9001	0.400186	6.90375e-07	0.113259	0.894029	K4+K27	CIMP-H
cg18429742	ZDHHC11	79844	0.763134	7.21067e-07	0.612645	0.261297	NA	CIMP-H
cg16114640	THSD1	55901	0.343656	7.50967e-07	0.0968384	0.518414	K4+K27	CIMP-H
cg20430063	MSRB3	253827	0.474503	7.50967e-07	0.288702	0.0839042	K4	CIMP-H
cg01757745	C10orf93	255352	0.59745	7.78819e-07	0.467325	0.0779206	K4	CIMP-H
cg05523047	VLDLR	7436	0.311194	7.78819e-07	0.0250096	0.452334	K4	CIMP-H
cg09374949	ISYNA1	51477	0.401283	7.78819e-07	0.11106	0.979609	K4	CIMP-H
cg19237879	SCUBE2	57758	0.548399	7.78819e-07	0.312543	0.75126	K4+K27	CIMP-H
cg09721427	HHEX	3087	0.54715	8.84423e-07	0.284961	0.806529	NA	CIMP-H
cg01606998	PANX2	56666	0.273563	9.68156e-07	0.0617183	0.128726	NA	CIMP-H
cg09381003	SHKBP1	92799	0.443475	1.01077e-06	0.25539	0.202022	K4	CIMP-H
cg21835643	RBPJL	11317	0.600887	1.01077e-06	0.424854	0.360321	K4	CIMP-H
cg08568512	FHOD3	80206	0.45358	1.05233e-06	0.0385422	0.392098	K4+K27	CIMP-H
cg25550573	C4orf31	79625	0.287149	1.10004e-06	0.125695	0.976278	NA	CIMP-H
cg10059959	PAX5	5079	0.339429	1.1921e-06	0.127921	0.869382	NA	CIMP-H
cg25397076	RBP7	116362	0.26846	1.1921e-06	0.0462523	0.798906	K4+K27	CIMP-H
cg06353318	OTOP2	92736	0.513816	1.24092e-06	0.342691	0.0512099	K4+K27	CIMP-H
cg19267846	PHOSPHO1	162466	0.231976	1.24092e-06	0.046765	0.592047	K4+K27	CIMP-H
cg16652259	DLX1	1745	0.33113	1.29169e-06	0.161448	0.172788	NA	CIMP-H
cg08820801	FBXO17	115290	0.703403	1.34986e-06	0.546031	0.255464	K4	CIMP-H
cg01356829	IL12RB2	3595	0.667626	1.40497e-06	0.55074	0.150281	K4+K27	CIMP-H
cg09331011	GNAL	2774	0.366995	1.4642e-06	0.0404279	0.976278	K4+K27	CIMP-H
cg17853587	NDST3	9348	0.307424	1.7241e-06	0.0785897	0.936918	NA	CIMP-H
cg07861564	HSPB8	26353	0.374895	1.79636e-06	0.165713	0.665753	K4	CIMP-H
cg21621248	LRRTM1	347730	0.37328	1.94732e-06	0.238925	0.338473	K4+K27	CIMP-H
cg20770175	COL3A1	1281	0.592846	2.02608e-06	0.407343	0.998067	None	CIMP-H
cg02279071	MLH1	4292	0.381173	2.11329e-06	0.127185	0.806529	K4	CIMP-H
cg12758687	DRD2	1813	0.461427	2.20134e-06	0.347392	0.140756	K4+K27	CIMP-H
cg24680602	ZNF232	7775	0.372228	2.29007e-06	0.182228	0.156887	NA	CIMP-H
cg02320454	GPR150	285601	0.542728	2.37337e-06	0.145996	0.981631	K4+K27	CIMP-H
cg04600618	RSPH9	221421	0.570505	2.37337e-06	0.400669	0.29838	K4	CIMP-H
cg04862249	ZFP3	124961	0.265829	2.37337e-06	0.0855535	0.398933	K4	CIMP-H
cg04230060	SUSD1	64420	0.635914	2.47196e-06	0.358101	0.811417	K4	CIMP-H
cg10978355	CKMT2	1160	0.573065	2.5777e-06	0.245123	0.425602	K4	CIMP-H
cg05840031	PAX6	5080	0.339823	2.79215e-06	0.134068	0.989978	K4+K27	CIMP-H
cg01805540	CACNB2	783	0.296449	2.89692e-06	0.107693	0.261297	K4	CIMP-H
cg08998501	ZNF615	284370	0.254919	2.89692e-06	0.0713424	0.826716	K4	CIMP-H
cg15147516	MIXL1	83881	0.339555	2.89692e-06	0.0417159	0.95752	K4+K27	CIMP-H
cg23727043	ADAMTS7	11173	0.334536	3.00923e-06	0.155972	0.652949	K4+K27	CIMP-H
cg26709950	RRAD	6236	0.383523	3.00923e-06	0.0854272	0.580384	K4+K27	CIMP-H
cg25552492	LGI3	203190	0.461608	3.12582e-06	0.226333	0.783078	K4+K27	CIMP-H
cg15915418	TLE1	7088	0.5114	3.24296e-06	0.356872	0.496412	K4	CIMP-H
cg23352579	RDX	5962	0.333824	3.36844e-06	0.0306021	0.521949	K4	CIMP-H
cg19524009	NEK3	4752	0.677855	3.50698e-06	0.391964	0.773146	NA	CIMP-H
cg27560922	ARHGDIG	398	0.387323	3.50698e-06	0.187182	0.245123	K4	CIMP-H
cg26620157	PAX9	5083	0.56299	3.65534e-06	0.358668	0.329157	NA	CIMP-H
cg02441647	COL8A1	1295	0.35508	3.79634e-06	0.223616	0.401791	K4+K27	CIMP-H
cg23263923	CD70	970	0.299983	3.93805e-06	0.177034	0.0876832	K4+K27	CIMP-H
cg10240853	MOSPD3	64598	0.384712	4.085e-06	0.2389	0.239886	K4	CIMP-H
cg01405761	CLVS1	157807	0.288203	4.25697e-06	0.095149	0.984891	K4	CIMP-H
cg01352108	KCNK4	50801	0.666226	4.42571e-06	0.488536	0.104674	K4+K27	CIMP-H
cg16428251	SOX14	8403	0.531851	4.60623e-06	0.382884	0.278477	K4+K27	CIMP-H
cg18342279	ZAR1	326340	0.396448	4.60623e-06	0.0786537	0.746142	K4+K27	CIMP-H
cg25583174	FGF2	2247	0.565984	4.78293e-06	0.32391	0.150281	K4	CIMP-H
cg02735486	ANK2	287	0.580685	4.97754e-06	0.399982	0.20501	None	CIMP-H
cg04797323	SOCS2	8835	0.557035	5.1681e-06	0.152947	0.710937	NA	CIMP-H
cg10193817	CADM1	23705	0.438414	5.1681e-06	0.284997	0.0603037	K4+K27	CIMP-H
cg08145625	TRAM1L1	133022	0.281677	5.38394e-06	0.133547	0.219575	K4	CIMP-H
cg00293409	LRRC33	375387	0.407466	5.82893e-06	0.0721414	0.907326	K4	CIMP-H
cg08228917	LHFP	10186	0.379312	5.82893e-06	0.103155	0.388121	K4+K27	CIMP-H
cg09835543	DIRAS2	54769	0.352275	5.82893e-06	0.118114	0.842285	K4+K27	CIMP-H
cg25250358	PLOD2	5352	0.394136	6.06457e-06	0.153337	0.663178	K4	CIMP-H
cg02717046	GPR133	283383	0.337949	6.2745e-06	0.223813	0.0538115	None	CIMP-H
cg12902039	OCA2	4948	0.529328	6.2745e-06	0.35881	0.385206	K4+K27	CIMP-H
cg26928603	KIRREL	55243	0.276685	6.2745e-06	0.206384	0.13323	K4	CIMP-H
cg07197823	INHBB	3625	0.441697	7.34749e-06	0.175442	0.99234	NA	CIMP-H
cg09851465	C1orf87	127795	0.418105	7.34749e-06	0.172427	0.656587	K4+K27	CIMP-H
cg20973210	C19orf35	374872	0.440677	7.34749e-06	0.322102	0.0801358	NA	CIMP-H
cg16933388	BSN	8927	0.354319	7.6506e-06	0.237957	0.0994088	K4	CIMP-H
cg03072378	DLX4	1748	0.237666	7.94846e-06	0.0489616	0.846129	K4+K27	CIMP-H
cg08101264	ACOT8	10005	0.284059	7.94846e-06	0.0981445	0.835333	K4	CIMP-H
cg13271951	FAM57B	83723	0.557299	7.94846e-06	0.43153	0.118077	K4	CIMP-H
cg09636671	LMOD1	25802	0.296353	8.2309e-06	0.0558792	0.912748	K4+K27	CIMP-H
cg10065825	CDH11	1009	0.558269	8.2309e-06	0.358567	0.530436	NA	CIMP-H
cg11530960	DMRT2	10655	0.479985	8.2309e-06	0.282419	0.228927	K4+K27	CIMP-H
cg12563178	PLXDC2	84898	0.312988	8.53243e-06	0.0964151	0.482448	K4	CIMP-H
cg04726446	C2orf39	92749	0.409274	8.82606e-06	0.201459	0.627096	K4	CIMP-H
cg17918501	FNDC4	64838	0.34821	8.82606e-06	0.196619	0.3811	K4	CIMP-H
cg22774472	COL5A2	1290	0.379222	9.17813e-06	0.234736	0.618807	K4	CIMP-H
cg25519930	CACNA1C	775	0.374014	9.56389e-06	0.11096	0.945337	NA	CIMP-H
cg09630404	STAR	6770	0.384432	9.91297e-06	0.242517	0.0828453	K4	CIMP-H
cg21820890	PLA2G12B	84647	0.912119	9.91297e-06	0.742723	0.656587	None	CIMP-H
cg23922708	PARD6G	84552	0.350352	9.91297e-06	0.09599	0.350131	K4	CIMP-H
cg05520656	ZNF681	148213	0.462826	1.07045e-05	0.267369	0.796102	K4	CIMP-H
cg02244695	TMEM176A	55365	0.324556	1.1557e-05	0.118931	0.920248	None	CIMP-H
cg26124016	RARB	5915	0.478125	1.20137e-05	0.271588	0.418483	K4	CIMP-H
cg26385286	GCNT2	2651	0.64603	1.20137e-05	0.44002	0.955603	NA	CIMP-H
cg17191178	SHOX2	6474	0.411695	1.24621e-05	0.107085	0.87574	K4+K27	CIMP-H
cg19836283	ITGA11	22801	0.333978	1.29798e-05	0.164947	0.689093	K4+K27	CIMP-H
cg06048156	ITGB3	3690	0.428118	1.3463e-05	0.0951935	0.754082	K4+K27	CIMP-H
cg21926138	C1orf88	128344	0.345335	1.3463e-05	0.142862	0.910073	K4	CIMP-H
cg26401870	NPM2	10361	0.489982	1.3463e-05	0.27403	0.949082	K4+K27	CIMP-H
cg02885771	LTV1	84946	0.747758	1.40063e-05	0.529453	0.976278	NA	CIMP-H
cg22734480	ABHD8	79575	0.253637	1.40063e-05	0.0784006	0.814254	K4	CIMP-H
cg03127334	ERG	2078	0.43672	1.56393e-05	0.26541	0.677057	K4+K27	CIMP-H
cg09214254	SMOC2	64094	0.400936	1.56393e-05	0.275716	0.239886	NA	CIMP-H
cg10279685	NPHP1	4867	0.304414	1.56393e-05	0.125368	0.274605	K4	CIMP-H
cg17210604	HIC1	3090	0.260377	1.74563e-05	0.0635411	0.639669	NA	CIMP-H
cg08478189	KLF7	8609	0.392599	1.87489e-05	0.142876	0.949082	K4	CIMP-H
cg02286642	ZNF254	9534	0.516948	1.94203e-05	0.397911	0.228927	NA	CIMP-H
cg20880234	ZMYM2	7750	0.282685	1.94203e-05	0.0889216	0.869382	NA	CIMP-H
cg25568243	DEM1	64789	0.356324	1.94203e-05	0.0859198	0.611638	K4	CIMP-H
cg21870884	GPR25	2848	0.768249	2.01736e-05	0.595965	0.717373	None	CIMP-H
cg05607127	KCNG3	170850	0.268584	2.0955e-05	0.0470595	0.969916	K4+K27	CIMP-H
cg27457941	RBP1	5947	0.463624	2.17027e-05	0.385629	0.0562572	K4+K27	CIMP-H
cg05670408	MAN1C1	57134	0.355518	2.25195e-05	0.0687241	0.652949	K4+K27	CIMP-H
cg15242570	CTSL1	1514	0.445245	2.34106e-05	0.202795	0.767432	K4	CIMP-H
cg08005849	HGF	3082	0.46471	2.51756e-05	0.284946	0.811417	None	CIMP-H
cg11476211	PRKCE	5581	0.250571	2.51756e-05	0.0313423	0.88546	K4+K27	CIMP-H
cg23065097	FKBP1B	2281	0.601811	2.51756e-05	0.415781	0.779036	NA	CIMP-H
cg24662961	IRX3	79191	0.370435	2.51756e-05	0.144368	0.603085	K4+K27	CIMP-H
cg01966465	RUNDC3B	154661	0.295093	2.60197e-05	0.0200093	0.773146	K4+K27	CIMP-H
cg03588357	GPR68	8111	0.365827	2.60197e-05	0.156157	0.484913	K4	CIMP-H
cg09472203	AP3B2	8120	0.384449	2.68919e-05	0.0717291	0.934497	K4	CIMP-H
cg00514407	SERPINE2	5270	0.279405	2.7819e-05	0.0678668	0.884142	NA	CIMP-H
cg02699167	FBXL2	25827	0.382184	2.7819e-05	0.140993	0.288831	K4	CIMP-H
cg05702737	WNT10A	80326	0.361676	2.7819e-05	0.2071	0.119681	K4+K27	CIMP-H
cg08631151	RPRML	388394	0.3115	2.7819e-05	0.208497	0.140756	K4+K27	CIMP-H
cg08359956	TMEM176B	28959	0.392793	2.87774e-05	0.229737	0.309637	None	CIMP-H
cg00888479	SLC24A3	57419	0.410621	2.97955e-05	0.242288	0.219575	K4+K27	CIMP-H
cg11269533	FEV	54738	0.316566	2.97955e-05	0.0899754	0.231392	K4+K27	CIMP-H
cg02280309	PKLR	5313	0.701318	3.20833e-05	0.494365	0.988924	None	CIMP-H
cg10453365	RHCG	51458	0.342627	3.4446e-05	0.0848026	0.984891	K4+K27	CIMP-H
cg02525756	RAB42	115273	0.474102	3.56896e-05	0.243346	0.879151	K4+K27	CIMP-H
cg21612046	ZNF550	162972	0.348077	3.56896e-05	0.215881	0.479201	NA	CIMP-H
cg27063986	NDST4	64579	0.6686	3.56896e-05	0.47052	0.980888	None	CIMP-H
cg27554782	CHRNB4	1143	0.481154	3.69434e-05	0.28298	0.941839	K4	CIMP-H
cg18702197	HOXD3	3232	0.4914	3.96158e-05	0.320169	0.732079	NA	CIMP-H
cg19791277	KHDRBS3	10656	0.291625	3.96158e-05	0.0421905	0.639669	K4+K27	CIMP-H
cg00024396	ELOVL5	60481	0.300083	4.08235e-05	0.14699	0.496412	K4	CIMP-H
cg02282237	PRKCH	5583	0.275148	4.08235e-05	0.119104	0.635983	K4+K27	CIMP-H
cg07699362	GPX3	2878	0.319416	4.08235e-05	0.111526	0.955603	K4	CIMP-H
cg18125479	PYGL	5836	0.286139	4.08235e-05	0.0933326	0.0547108	K4	CIMP-H
cg07359545	GP1BB	2812	0.579141	4.22895e-05	0.336488	0.727623	K4+K27	CIMP-H
cg10983208	SPOCK2	9806	0.484339	5.07184e-05	0.362234	0.242397	K4+K27	CIMP-H
cg16253412	TPST1	8460	0.294371	5.46254e-05	0.112501	0.699859	K4	CIMP-H
cg01200060	SCRT2	85508	0.309043	5.65646e-05	0.167054	0.172788	K4+K27	CIMP-H
cg11115702	SPNS1	83985	0.324752	5.83228e-05	0.183522	0.756928	K4	CIMP-H
cg22156632	WNT6	7475	0.518935	5.83228e-05	0.356101	0.754082	K4+K27	CIMP-H
cg15705469	ZNF71	58491	0.291534	6.25257e-05	0.113283	0.765134	K4	CIMP-H
cg02104644	SYT7	9066	0.349615	6.44127e-05	0.116556	0.717373	K4+K27	CIMP-H
cg19439331	TET1	80312	0.246803	6.44127e-05	0.0661224	0.710937	K4	CIMP-H
cg21180599	TLE6	79816	0.466738	6.44127e-05	0.309799	0.756928	NA	CIMP-H
cg22646528	DTNA	1837	0.368738	6.44127e-05	0.091549	0.129774	K4	CIMP-H
cg05847778	BBS5	129880	0.267255	6.6577e-05	0.0946533	0.562979	K4+K27	CIMP-H
cg12955583	KNDC1	85442	0.276252	6.6577e-05	0.103107	0.0615845	K4	CIMP-H
cg06630737	C1orf187	374946	0.393171	6.8812e-05	0.239883	0.158922	K4	CIMP-H
cg04001842	DUOXA2	405753	0.31648	7.112e-05	0.0635515	0.986809	K4+K27	CIMP-H
cg21794225	PRKD1	5587	0.544019	7.112e-05	0.440948	0.144911	NA	CIMP-H
cg06493386	TRPA1	8989	0.561039	7.38024e-05	0.386252	0.874025	K4+K27	CIMP-H
cg02927346	RASL10B	91608	0.545154	7.90753e-05	0.405623	0.301767	K4	CIMP-H
cg11572744	DPYSL3	1809	0.382857	7.90753e-05	0.149047	0.717373	K4	CIMP-H
cg12294121	GABRB1	2560	0.329879	8.20437e-05	0.137452	0.941839	K4+K27	CIMP-H
cg05705366	SNX18	112574	0.290934	9.41871e-05	0.0737485	0.974979	K4	CIMP-H

## Sheet: CIMP-H and CIMP-L
Supplemental Table 4 - Gene promoter classification among colorectal samples
Probe ID	Gene Symbol	Gene ID	CIMP-H mean beta-value	CIMP-H vs. nonCIMP FDR-adjusted P value	CIMP-L mean beta-value	CIMP-L vs. nonCIMP FDR-adjusted P value	ES cell histone marks	Gene category
cg11428724	PAX7	5081	0.833135	5.72862e-10	0.816493	2.73396e-07	K4+K27	CIMP-H and CIMP-L
cg15640375	LPPR3	79948	0.661703	3.4783e-10	0.600413	3.07145e-07	None	CIMP-H and CIMP-L
cg09495977	HTRA3	94031	0.526814	4.77762e-10	0.487099	4.66164e-07	K27	CIMP-H and CIMP-L
cg18403396	B3GAT2	135152	0.534152	4.39384e-09	0.33711	4.66164e-07	K4+K27	CIMP-H and CIMP-L
cg17775235	NPTX1	4884	0.667707	3.92568e-11	0.495553	5.22379e-07	K4+K27	CIMP-H and CIMP-L
cg05899618	GDF7	151449	0.635125	2.14704e-10	0.547806	6.88796e-07	NA	CIMP-H and CIMP-L
cg21513553	COL6A2	1292	0.720997	1.08916e-07	0.741644	6.88796e-07	None	CIMP-H and CIMP-L
cg16584573	FGF8	2253	0.732833	1.78478e-10	0.630512	7.89345e-07	K4+K27	CIMP-H and CIMP-L
cg11847808	EPHA8	2046	0.580307	6.81772e-10	0.526859	9.14489e-07	K4	CIMP-H and CIMP-L
cg22063989	RSPO1	284654	0.522126	2.45812e-07	0.545302	9.66654e-07	K27	CIMP-H and CIMP-L
cg04713521	PRRX2	51450	0.650028	1.47638e-08	0.624071	1.32114e-06	K4	CIMP-H and CIMP-L
cg02136132	KCNK13	56659	0.546648	3.85162e-11	0.270846	2.20408e-06	K4+K27	CIMP-H and CIMP-L
cg07143898	SLIT1	6585	0.601251	3.92388e-11	0.356826	2.45313e-06	K4+K27	CIMP-H and CIMP-L
cg09945801	WRN	7486	0.668031	1.94732e-06	0.680081	2.45313e-06	K4+K27	CIMP-H and CIMP-L
cg25332298	ELAVL3	1995	0.538152	2.09938e-10	0.46963	2.45313e-06	NA	CIMP-H and CIMP-L
cg26525091	MADCAM1	8174	0.605736	6.09197e-07	0.600387	2.45313e-06	K4+K27	CIMP-H and CIMP-L
cg21321735	KIF1A	547	0.548957	1.28975e-09	0.299235	2.69178e-06	NA	CIMP-H and CIMP-L
cg25302419	CTNND2	1501	0.65232	1.88818e-09	0.613971	2.69178e-06	K4+K27	CIMP-H and CIMP-L
cg01519742	JAKMIP1	152789	0.695449	7.94574e-09	0.628164	3.82433e-06	K4	CIMP-H and CIMP-L
cg13346411	CCKBR	887	0.636187	2.0052e-10	0.543702	3.82433e-06	K4+K27	CIMP-H and CIMP-L
cg26195812	DPYSL5	56896	0.777504	3.85162e-11	0.601124	3.82433e-06	K4+K27	CIMP-H and CIMP-L
cg00318573	CHRNA4	1137	0.65562	4.30328e-08	0.642074	4.80938e-06	K4+K27	CIMP-H and CIMP-L
cg09416313	MATK	4145	0.626533	1.0424e-07	0.615045	4.80938e-06	K4	CIMP-H and CIMP-L
cg18952560	SIRPA	140885	0.622783	7.36501e-11	0.483364	4.80938e-06	K4+K27	CIMP-H and CIMP-L
cg21435336	ANKLE1	126549	0.623193	1.82923e-10	0.517094	4.80938e-06	K4	CIMP-H and CIMP-L
cg11935147	PDE4DIP	9659	0.698079	3.85162e-11	0.580041	5.87499e-06	K4+K27	CIMP-H and CIMP-L
cg11399100	TMEM59L	25789	0.593863	1.07376e-10	0.396491	6.24078e-06	NA	CIMP-H and CIMP-L
cg01291404	COL2A1	1280	0.51006	8.95543e-11	0.364633	6.65522e-06	K4+K27	CIMP-H and CIMP-L
cg09874752	SFRP5	6425	0.581035	9.34941e-10	0.447601	6.65522e-06	K4+K27	CIMP-H and CIMP-L
cg11981631	ABCC8	6833	0.635067	4.48171e-11	0.439919	6.65522e-06	K4+K27	CIMP-H and CIMP-L
cg04274487	RAB31	11031	0.59371	3.85162e-11	0.289656	9.35248e-06	K4+K27	CIMP-H and CIMP-L
cg10647513	HBA1	3039	0.497271	8.53243e-06	0.498274	1.10679e-05	K27	CIMP-H and CIMP-L
cg17503456	FOXL2	668	0.677721	3.85162e-11	0.390455	1.32016e-05	K4+K27	CIMP-H and CIMP-L
cg21017752	PPP1R3C	5507	0.549781	1.70145e-08	0.519881	1.32016e-05	K4+K27	CIMP-H and CIMP-L
cg18602314	GFPT2	9945	0.426772	1.13986e-08	0.379288	1.41245e-05	K4	CIMP-H and CIMP-L
cg02899772	NECAB2	54550	0.558601	1.0424e-07	0.52233	1.65674e-05	K4	CIMP-H and CIMP-L
cg19358493	EMX2	2018	0.414975	1.46696e-07	0.436026	1.697e-05	NA	CIMP-H and CIMP-L
cg17880199	MYH11	4629	0.605895	8.01618e-11	0.463522	1.95942e-05	K4+K27	CIMP-H and CIMP-L
cg21547708	SSTR2	6752	0.59871	6.44127e-05	0.634024	2.15595e-05	K4+K27	CIMP-H and CIMP-L
cg22994720	CHRDL2	25884	0.455716	3.56896e-05	0.460347	2.2129e-05	K4+K27	CIMP-H and CIMP-L
cg13878010	ADCY5	111	0.684144	5.52222e-09	0.585434	2.39653e-05	K4+K27	CIMP-H and CIMP-L
cg19850348	PYGO1	26108	0.682487	5.3894e-07	0.663338	2.39653e-05	K4+K27	CIMP-H and CIMP-L
cg22594309	SYT2	127833	0.640308	1.18299e-10	0.511127	2.39653e-05	K4	CIMP-H and CIMP-L
cg08859916	PTEN	5728	0.546397	3.85162e-11	0.317016	3.28635e-05	K4	CIMP-H and CIMP-L
cg14823162	POU3F2	5454	0.463507	2.77742e-10	0.306425	3.51197e-05	NA	CIMP-H and CIMP-L
cg15753757	AUTS2	26053	0.594548	4.52436e-11	0.347657	3.51197e-05	K4+K27	CIMP-H and CIMP-L
cg21553524	TMEM178	130733	0.528364	2.25808e-07	0.471653	3.5575e-05	K4+K27	CIMP-H and CIMP-L
cg22815110	FOXD3	27022	0.698106	2.16932e-07	0.664831	3.5575e-05	K4	CIMP-H and CIMP-L
cg00746981	HDGF	3068	0.434578	5.72862e-10	0.355524	3.93077e-05	K4	CIMP-H and CIMP-L
cg16041660	PRICKLE1	144165	0.736061	1.23365e-09	0.635644	3.93077e-05	K4+K27	CIMP-H and CIMP-L
cg09622447	CBS	875	0.678345	1.21724e-10	0.425605	4.93829e-05	K4	CIMP-H and CIMP-L
cg03732545	CNTN2	6900	0.552659	5.4474e-08	0.543393	5.01193e-05	K4	CIMP-H and CIMP-L
cg00625653	WNT7A	7476	0.699571	1.56215e-10	0.544394	5.09019e-05	K4+K27	CIMP-H and CIMP-L
cg07109287	LHX2	9355	0.852046	3.85162e-11	0.520788	5.2411e-05	K4+K27	CIMP-H and CIMP-L
cg00826384	PTPRZ1	5803	0.522177	3.01114e-09	0.407366	5.79838e-05	K4	CIMP-H and CIMP-L
cg16042149	NEFH	4744	0.645544	6.09197e-07	0.621301	5.79838e-05	K4+K27	CIMP-H and CIMP-L
cg09949775	COMP	1311	0.661568	4.02611e-09	0.553659	5.89723e-05	K4+K27	CIMP-H and CIMP-L
cg23089840	LRRC3	81543	0.594746	2.17027e-05	0.635634	5.89723e-05	NA	CIMP-H and CIMP-L
cg19141563	PPM1E	22843	0.561204	5.05936e-09	0.473716	6.07468e-05	K4	CIMP-H and CIMP-L
cg10247252	GALR2	8811	0.43274	4.21191e-09	0.395444	6.29754e-05	K4+K27	CIMP-H and CIMP-L
cg07015629	ERBB4	2066	0.67159	1.7241e-06	0.656736	6.97731e-05	K4+K27	CIMP-H and CIMP-L
cg13216057	DKK3	27122	0.507072	2.45812e-07	0.419194	6.97731e-05	K4+K27	CIMP-H and CIMP-L
cg02508567	TCF7L1	83439	0.66266	6.29106e-11	0.410442	7.19247e-05	K4	CIMP-H and CIMP-L
cg02503850	ADAMTS14	140766	0.572141	1.07045e-05	0.575703	8.20375e-05	K4	CIMP-H and CIMP-L
cg04981492	SYDE1	85360	0.600055	4.085e-06	0.567276	8.20375e-05	K4	CIMP-H and CIMP-L
cg17834752	KCNK9	51305	0.617647	6.56367e-09	0.567038	8.20375e-05	K4+K27	CIMP-H and CIMP-L
cg19917856	NCCRP1	342897	0.688159	3.03975e-07	0.66159	8.20375e-05	K27	CIMP-H and CIMP-L
cg05421688	FAM163A	148753	0.486729	6.4989e-10	0.347023	8.46177e-05	K4+K27	CIMP-H and CIMP-L
cg19332710	RIMS4	140730	0.784856	1.07376e-10	0.570224	9.10426e-05	K4+K27	CIMP-H and CIMP-L
cg13686115	PHYHIPL	84457	0.368157	5.18102e-07	0.36282	9.39417e-05	K4+K27	CIMP-H and CIMP-L
cg08315770	KCNK17	89822	0.698465	3.92568e-11	0.496586	9.50901e-05	K4+K27	CIMP-H and CIMP-L
cg15014549	SLC47A1	55244	0.600684	4.93361e-11	0.349082	9.50901e-05	K4+K27	CIMP-H and CIMP-L
cg19355190	EGR2	1959	0.630759	3.4783e-10	0.499377	9.50901e-05	K4+K27	CIMP-H and CIMP-L

## Sheet: Non-CIMP cancer specific
Supplemental Table 4 - Gene promoter classification among colorectal samples
Probe ID	Gene Symbol	Gene ID	Normal adjacent mean beta-value	Tumor mean beta-value	CIMP-H vs. nonCIMP FDR-adjusted P value	ES cell histone marks	Gene category
cg00240432	TWIST1	7291	0.0288334	0.482542	7.79863e-07	K4+K27	Non-CIMP cancer specific
cg00503840	DLX5	1749	0.475681	0.717713	7.79863e-07	NA	Non-CIMP cancer specific
cg00806490	CDH13	1012	0.148527	0.584663	7.79863e-07	K4+K27	Non-CIMP cancer specific
cg00970325	PAQR9	344838	0.11159	0.47933	7.79863e-07	NA	Non-CIMP cancer specific
cg00995327	CHST2	9435	0.0541741	0.629286	7.79863e-07	K4	Non-CIMP cancer specific
cg01192900	BTG4	54766	0.159842	0.646521	7.79863e-07	NA	Non-CIMP cancer specific
cg01295203	PRDM14	63978	0.0759666	0.665716	7.79863e-07	NA	Non-CIMP cancer specific
cg01767116	FBXL22	283807	0.347058	0.562395	7.79863e-07	NA	Non-CIMP cancer specific
cg02681442	FOXG1	2290	0.103109	0.50338	7.79863e-07	K4+K27	Non-CIMP cancer specific
cg02860342	HCN4	10021	0.224942	0.531103	7.79863e-07	K4	Non-CIMP cancer specific
cg03064067	SLC6A15	55117	0.215559	0.664302	7.79863e-07	K4	Non-CIMP cancer specific
cg03388193	HPSE2	60495	0.137151	0.530606	7.79863e-07	K4+K27	Non-CIMP cancer specific
cg03538436	NOS1	4842	0.190817	0.646044	7.79863e-07	K4+K27	Non-CIMP cancer specific
cg03630088	CPXM2	119587	0.164113	0.563407	7.79863e-07	K4	Non-CIMP cancer specific
cg03853987	CHST10	9486	0.0672159	0.732351	7.79863e-07	K4	Non-CIMP cancer specific
cg04380513	ST8SIA4	7903	0.0528477	0.295784	7.79863e-07	K4+K27	Non-CIMP cancer specific
cg04456238	WT1	7490	0.344872	0.677594	7.79863e-07	NA	Non-CIMP cancer specific
cg04534765	GALR1	2587	0.25022	0.722849	7.79863e-07	K4+K27	Non-CIMP cancer specific
cg04922810	CRHR2	1395	0.121412	0.554938	7.79863e-07	K4+K27	Non-CIMP cancer specific
cg04999691	C7orf29	113763	0.352074	0.588485	7.79863e-07	None	Non-CIMP cancer specific
cg05245861	C18orf34	374864	0.11162	0.505242	7.79863e-07	K4	Non-CIMP cancer specific
cg05270634	RND2	8153	0.0724399	0.380651	7.79863e-07	K4	Non-CIMP cancer specific
cg05307923	ADARB2	105	0.0461195	0.460489	7.79863e-07	K4+K27	Non-CIMP cancer specific
cg05345286	MDFI	4188	0.0795561	0.715069	7.79863e-07	K4+K27	Non-CIMP cancer specific
cg05436658	PRKCB	5579	0.0279249	0.451277	7.79863e-07	K4+K27	Non-CIMP cancer specific
cg05774801	SFRP2	6423	0.0901338	0.527276	7.79863e-07	K4	Non-CIMP cancer specific
cg06269753	MSC	9242	0.115649	0.55062	7.79863e-07	K4+K27	Non-CIMP cancer specific
cg06564900	FIGN	55137	0.121992	0.488356	7.79863e-07	K4	Non-CIMP cancer specific
cg06856528	TMEFF2	23671	0.181123	0.581853	7.79863e-07	K4+K27	Non-CIMP cancer specific
cg06905514	CAMK2B	816	0.0621269	0.500861	7.79863e-07	K4+K27	Non-CIMP cancer specific
cg06908778	SPAG6	9576	0.314561	0.641118	7.79863e-07	K4+K27	Non-CIMP cancer specific
cg07080358	CNRIP1	25927	0.215928	0.720363	7.79863e-07	K4+K27	Non-CIMP cancer specific
cg07327468	EYA4	2070	0.117925	0.407496	7.79863e-07	NA	Non-CIMP cancer specific
cg07447922	EPHA10	284656	0.267009	0.606644	7.79863e-07	K4+K27	Non-CIMP cancer specific
cg07651242	ADCY1	107	0.10867	0.567927	7.79863e-07	K4+K27	Non-CIMP cancer specific
cg07748540	PDGFD	80310	0.0319072	0.48372	7.79863e-07	K4	Non-CIMP cancer specific
cg07758904	SLC46A2	57864	0.235414	0.654614	7.79863e-07	K4+K27	Non-CIMP cancer specific
cg08132931	ADD2	119	0.0545195	0.517532	7.79863e-07	K4	Non-CIMP cancer specific
cg08190291	ADAMTS5	11096	0.11596	0.565022	7.79863e-07	NA	Non-CIMP cancer specific
cg08623787	RXRG	6258	0.169909	0.535325	7.79863e-07	K4+K27	Non-CIMP cancer specific
cg09099744	CDKN2A	1029	0.102017	0.586514	7.79863e-07	NA	Non-CIMP cancer specific
cg09573795	MSX1	4487	0.451256	0.698249	7.79863e-07	NA	Non-CIMP cancer specific
cg10293925	AMPH	273	0.190892	0.744471	7.79863e-07	K4+K27	Non-CIMP cancer specific
cg10918202	BAALC	79870	0.0633708	0.500151	7.79863e-07	K4+K27	Non-CIMP cancer specific
cg11004890	SLC4A11	83959	0.190258	0.578885	7.79863e-07	K4+K27	Non-CIMP cancer specific
cg11243196	ADAMTS3	9508	0.0365827	0.40872	7.79863e-07	K4	Non-CIMP cancer specific
cg11319389	TOX2	84969	0.111617	0.455969	7.79863e-07	K4+K27	Non-CIMP cancer specific
cg11389172	SLC18A3	6572	0.25772	0.667412	7.79863e-07	K4+K27	Non-CIMP cancer specific
cg11812218	GHSR	2693	0.129353	0.576404	7.79863e-07	NA	Non-CIMP cancer specific
cg12145907	PCDHGC4	56098	0.226399	0.478941	7.79863e-07	K4+K27	Non-CIMP cancer specific
cg12164282	PXDN	7837	0.409232	0.801979	7.79863e-07	K4	Non-CIMP cancer specific
cg12265829	ADCY4	196883	0.159207	0.575843	7.79863e-07	K4+K27	Non-CIMP cancer specific
cg12300353	KCTD8	386617	0.148485	0.675036	7.79863e-07	K4	Non-CIMP cancer specific
cg13492340	ITGA8	8516	0.0648455	0.327266	7.79863e-07	K4+K27	Non-CIMP cancer specific
cg13652336	PREX2	80243	0.127688	0.51572	7.79863e-07	NA	Non-CIMP cancer specific
cg13755070	FLI1	2313	0.0441763	0.40568	7.79863e-07	K4+K27	Non-CIMP cancer specific
cg13823136	ST6GALNAC5	81849	0.113855	0.58779	7.79863e-07	K4+K27	Non-CIMP cancer specific
cg13843613	FAM5B	57795	0.0686247	0.488283	7.79863e-07	NA	Non-CIMP cancer specific
cg13877915	ZNF132	7691	0.0524344	0.582963	7.79863e-07	K4	Non-CIMP cancer specific
cg14242042	SOX5	6660	0.0262354	0.452004	7.79863e-07	K4	Non-CIMP cancer specific
cg14377593	TFPI2	7980	0.154593	0.584545	7.79863e-07	K4	Non-CIMP cancer specific
cg14409941	ADAMTS2	9509	0.0945323	0.602393	7.79863e-07	K4+K27	Non-CIMP cancer specific
cg14538332	SDC2	6383	0.0770666	0.509907	7.79863e-07	K4	Non-CIMP cancer specific
cg14832904	GPR75	10936	0.537857	0.866607	7.79863e-07	K4	Non-CIMP cancer specific
cg15087147	LRRC4	64101	0.0282082	0.477678	7.79863e-07	NA	Non-CIMP cancer specific
cg15749748	GATA5	140628	0.143786	0.505553	7.79863e-07	K4+K27	Non-CIMP cancer specific
cg15802898	FOXE1	2304	0.0964877	0.542583	7.79863e-07	K4+K27	Non-CIMP cancer specific
cg16340268	ITPKB	3707	0.0486536	0.428282	7.79863e-07	K4+K27	Non-CIMP cancer specific
cg16792800	GPC6	10082	0.263472	0.736228	7.79863e-07	K4	Non-CIMP cancer specific
cg17018527	TM6SF1	53346	0.019312	0.267456	7.79863e-07	K4+K27	Non-CIMP cancer specific
cg17177660	VEGFC	7424	0.281029	0.68725	7.79863e-07	NA	Non-CIMP cancer specific
cg17190608	CUX2	23316	0.136919	0.616815	7.79863e-07	K4	Non-CIMP cancer specific
cg17296166	PNMAL1	55228	0.098305	0.609586	7.79863e-07	K4	Non-CIMP cancer specific
cg17389519	PTF1A	256297	0.285851	0.580268	7.79863e-07	NA	Non-CIMP cancer specific
cg17791651	POU3F1	5453	0.232848	0.544808	7.79863e-07	NA	Non-CIMP cancer specific
cg17892556	ZNF625	90589	0.0691622	0.757646	7.79863e-07	K4	Non-CIMP cancer specific
cg17906786	C13orf36	400120	0.280194	0.544565	7.79863e-07	K4+K27	Non-CIMP cancer specific
cg17923358	RELN	5649	0.198488	0.613114	7.79863e-07	K4+K27	Non-CIMP cancer specific
cg18277754	ALK	238	0.181673	0.619905	7.79863e-07	K4+K27	Non-CIMP cancer specific
cg18349835	VIPR2	7434	0.0552033	0.610324	7.79863e-07	NA	Non-CIMP cancer specific
cg18416881	AKR1B1	231	0.0565813	0.52733	7.79863e-07	K4	Non-CIMP cancer specific
cg18533225	KLHDC7B	113730	0.421796	0.756873	7.79863e-07	None	Non-CIMP cancer specific
cg18755783	SPG20	23111	0.102741	0.643507	7.79863e-07	K4	Non-CIMP cancer specific
cg18972811	SLIT2	9353	0.0733245	0.487783	7.79863e-07	K4+K27	Non-CIMP cancer specific
cg19063972	SOX21	11166	0.0690531	0.493375	7.79863e-07	NA	Non-CIMP cancer specific
cg19064258	HS3ST2	9956	0.168483	0.646746	7.79863e-07	K4+K27	Non-CIMP cancer specific
cg19461644	COL15A1	1306	0.233492	0.599991	7.79863e-07	K4+K27	Non-CIMP cancer specific
cg19674669	GLB1L3	112937	0.118273	0.588816	7.79863e-07	K4	Non-CIMP cancer specific
cg19764418	RYR2	6262	0.511608	0.796214	7.79863e-07	NA	Non-CIMP cancer specific
cg19831575	FGF4	2249	0.277348	0.691303	7.79863e-07	K4+K27	Non-CIMP cancer specific
cg19884262	FOXI2	399823	0.303473	0.681458	7.79863e-07	K4+K27	Non-CIMP cancer specific
cg19918758	VAV3	10451	0.0270457	0.401947	7.79863e-07	NA	Non-CIMP cancer specific
cg20113732	NELL1	4745	0.192359	0.63294	7.79863e-07	K4+K27	Non-CIMP cancer specific
cg20415809	ITGA4	3676	0.113631	0.653416	7.79863e-07	K4+K27	Non-CIMP cancer specific
cg20546002	COL23A1	91522	0.0406433	0.45516	7.79863e-07	K4+K27	Non-CIMP cancer specific
cg20950011	CIDEA	1149	0.250863	0.574137	7.79863e-07	K4+K27	Non-CIMP cancer specific
cg21226224	SOX17	64321	0.233835	0.686318	7.79863e-07	K4+K27	Non-CIMP cancer specific
cg21432954	TRPC4	7223	0.110127	0.633728	7.79863e-07	K4+K27	Non-CIMP cancer specific
cg21669679	DCC	1630	0.173703	0.537172	7.79863e-07	K4+K27	Non-CIMP cancer specific
cg21688264	SNAP91	9892	0.12213	0.655196	7.79863e-07	K4+K27	Non-CIMP cancer specific
cg22471346	GAS7	8522	0.247965	0.659081	7.79863e-07	K27	Non-CIMP cancer specific
cg22946150	SH3GL3	6457	0.111529	0.718062	7.79863e-07	K4+K27	Non-CIMP cancer specific
cg23239396	CALCR	799	0.201424	0.542212	7.79863e-07	K4+K27	Non-CIMP cancer specific
cg23887396	SARM1	23098	0.113004	0.547945	7.79863e-07	K4+K27	Non-CIMP cancer specific
cg23898073	GFRA1	2674	0.0801662	0.659574	7.79863e-07	NA	Non-CIMP cancer specific
cg24019564	RUNX3	864	0.121215	0.536653	7.79863e-07	NA	Non-CIMP cancer specific
cg24068372	WDR86	349136	0.221453	0.724339	7.79863e-07	K4	Non-CIMP cancer specific
cg24625128	JAM3	83700	0.0955241	0.482987	7.79863e-07	K4	Non-CIMP cancer specific
cg24687051	KCNQ5	56479	0.223909	0.756322	7.79863e-07	K4+K27	Non-CIMP cancer specific
cg24834740	PPP1R16B	26051	0.0658564	0.543001	7.79863e-07	K4+K27	Non-CIMP cancer specific
cg25084878	FBN2	2201	0.303939	0.721772	7.79863e-07	K4+K27	Non-CIMP cancer specific
cg25437385	SLC35F3	148641	0.122762	0.734483	7.79863e-07	K4+K27	Non-CIMP cancer specific
cg25657834	NTSR2	23620	0.11024	0.353845	7.79863e-07	K4+K27	Non-CIMP cancer specific
cg26021627	FAM150A	389658	0.0839876	0.458086	7.79863e-07	NA	Non-CIMP cancer specific
cg26069745	HOXA2	3199	0.384032	0.755578	7.79863e-07	K27	Non-CIMP cancer specific
cg26416466	MEGF11	84465	0.0204771	0.338233	7.79863e-07	NA	Non-CIMP cancer specific
cg26924825	LCAT	3931	0.299033	0.723116	7.79863e-07	None	Non-CIMP cancer specific
cg27138584	KCNK12	56660	0.0217227	0.29513	7.79863e-07	K4+K27	Non-CIMP cancer specific
cg27546237	COL4A1	1282	0.138874	0.630729	7.79863e-07	K4	Non-CIMP cancer specific
cg00333226	VWC2	375567	0.17847	0.55706	8.49641e-07	K4+K27	Non-CIMP cancer specific
cg00654814	MGAT5B	146664	0.144983	0.6026	8.49641e-07	K4	Non-CIMP cancer specific
cg01777397	CLIP4	79745	0.229621	0.625315	8.49641e-07	K4+K27	Non-CIMP cancer specific
cg01946574	PTPRM	5797	0.109674	0.597828	8.49641e-07	K4	Non-CIMP cancer specific
cg02126753	AEBP1	165	0.119886	0.623184	8.49641e-07	K4	Non-CIMP cancer specific
cg02361557	NTNG1	22854	0.0228325	0.357006	8.49641e-07	K4	Non-CIMP cancer specific
cg05839235	NPR3	4883	0.20802	0.568516	8.49641e-07	K4+K27	Non-CIMP cancer specific
cg06668300	MAL	4118	0.0533516	0.49571	8.49641e-07	K4+K27	Non-CIMP cancer specific
cg07903918	GABBR2	9568	0.17785	0.711667	8.49641e-07	NA	Non-CIMP cancer specific
cg08090772	ADHFE1	137872	0.124976	0.637559	8.49641e-07	K4	Non-CIMP cancer specific
cg09626984	GATA4	2626	0.344517	0.697395	8.49641e-07	NA	Non-CIMP cancer specific
cg11016563	TRPC6	7225	0.165565	0.479915	8.49641e-07	K4+K27	Non-CIMP cancer specific
cg11634198	NEUROD2	4761	0.181243	0.397816	8.49641e-07	K4+K27	Non-CIMP cancer specific
cg12514620	SSBP3	23648	0.107519	0.355121	8.49641e-07	K4	Non-CIMP cancer specific
cg12741420	IRF4	3662	0.09195	0.596195	8.49641e-07	K4+K27	Non-CIMP cancer specific
cg12874092	VIM	7431	0.017132	0.46134	8.49641e-07	K4	Non-CIMP cancer specific
cg13168820	PTPRT	11122	0.228367	0.694177	8.49641e-07	K4+K27	Non-CIMP cancer specific
cg13828758	NDN	4692	0.578441	0.793214	8.49641e-07	K4	Non-CIMP cancer specific
cg14586939	NPY2R	4887	0.08197	0.3266	8.49641e-07	K4+K27	Non-CIMP cancer specific
cg15045441	C6orf155	79940	0.136143	0.634291	8.49641e-07	NA	Non-CIMP cancer specific
cg15817236	ALX4	60529	0.0452657	0.519557	8.49641e-07	K4+K27	Non-CIMP cancer specific
cg15984661	CCDC8	83987	0.106192	0.404324	8.49641e-07	K4	Non-CIMP cancer specific
cg16638540	ZNF135	7694	0.439561	0.732931	8.49641e-07	K4	Non-CIMP cancer specific
cg17108819	CD8A	925	0.0965386	0.616196	8.49641e-07	K4+K27	Non-CIMP cancer specific
cg17606785	EFS	10278	0.212676	0.509166	8.49641e-07	K4	Non-CIMP cancer specific
cg18239753	KHDRBS2	202559	0.236128	0.67717	8.49641e-07	K4	Non-CIMP cancer specific
cg18338311	TMEM132E	124842	0.174932	0.725088	8.49641e-07	K27	Non-CIMP cancer specific
cg18399321	MGAT3	4248	0.0779137	0.509909	8.49641e-07	K4	Non-CIMP cancer specific
cg21359747	ALDH1A3	220	0.151958	0.676685	8.49641e-07	K4+K27	Non-CIMP cancer specific
cg21604803	CPT1C	126129	0.0448517	0.386452	8.49641e-07	K4	Non-CIMP cancer specific
cg21922574	NETO1	81832	0.0533707	0.333193	8.49641e-07	NA	Non-CIMP cancer specific
cg23037403	ZNF454	285676	0.324452	0.636376	8.49641e-07	K4	Non-CIMP cancer specific
cg23129478	ST8SIA5	29906	0.0831687	0.501576	8.49641e-07	NA	Non-CIMP cancer specific
cg24562819	THBD	7056	0.138265	0.751037	8.49641e-07	K4+K27	Non-CIMP cancer specific
cg24805239	DFNA5	1687	0.0299112	0.502313	8.49641e-07	K4+K27	Non-CIMP cancer specific
cg25228126	FZD2	2535	0.107866	0.493789	8.49641e-07	K4+K27	Non-CIMP cancer specific
cg25524350	PEG10	23089	0.0789139	0.364943	8.49641e-07	K4	Non-CIMP cancer specific
cg25764191	INA	9118	0.156245	0.547582	8.49641e-07	K4+K27	Non-CIMP cancer specific
cg25990647	OPRK1	4986	0.191444	0.675745	8.49641e-07	K4+K27	Non-CIMP cancer specific
cg26024843	COL5A1	1289	0.278777	0.583116	8.49641e-07	K4	Non-CIMP cancer specific
cg26756083	MMP16	4325	0.0638354	0.451873	8.49641e-07	K4	Non-CIMP cancer specific
cg26831415	EFHA2	286097	0.123023	0.551254	8.49641e-07	K4	Non-CIMP cancer specific
cg27319898	ZNF804B	219578	0.0895809	0.539808	8.49641e-07	K4+K27	Non-CIMP cancer specific
cg27352992	CNTN1	1272	0.168716	0.511852	8.49641e-07	K4	Non-CIMP cancer specific
cg00903242	CHL1	10752	0.174229	0.508394	1.04015e-06	K4+K27	Non-CIMP cancer specific
cg01664666	PLD5	200150	0.0863116	0.523476	1.04015e-06	K4+K27	Non-CIMP cancer specific
cg02489552	CCDC105	126402	0.378746	0.593148	1.04015e-06	K4	Non-CIMP cancer specific
cg02569613	C10orf72	196740	0.180033	0.610916	1.04015e-06	K4	Non-CIMP cancer specific
cg03361068	TRIM9	114088	0.0140791	0.266875	1.04015e-06	K4+K27	Non-CIMP cancer specific
cg03561565	KCNS2	3788	0.233901	0.555807	1.04015e-06	NA	Non-CIMP cancer specific
cg04072323	SPHKAP	80309	0.226196	0.591009	1.04015e-06	K4+K27	Non-CIMP cancer specific
cg05396987	TMEM155	132332	0.250239	0.604246	1.04015e-06	K4+K27	Non-CIMP cancer specific
cg05882522	EHD3	30845	0.0334675	0.400853	1.04015e-06	K4+K27	Non-CIMP cancer specific
cg06151165	VSX1	30813	0.135657	0.631615	1.04015e-06	K4+K27	Non-CIMP cancer specific
cg06498267	HCN1	348980	0.240808	0.652268	1.04015e-06	K4	Non-CIMP cancer specific
cg07271264	MYOD1	4654	0.335685	0.697297	1.04015e-06	K4+K27	Non-CIMP cancer specific
cg08190044	ATP8B2	57198	0.128706	0.649327	1.04015e-06	K4	Non-CIMP cancer specific
cg08578641	DNAI1	27019	0.402096	0.673976	1.04015e-06	K4	Non-CIMP cancer specific
cg08583049	FOXB1	27023	0.0407073	0.300447	1.04015e-06	K4+K27	Non-CIMP cancer specific
cg08849574	ZNF134	7693	0.250365	0.69259	1.04015e-06	K4	Non-CIMP cancer specific
cg09083627	SLITRK5	26050	0.137223	0.668146	1.04015e-06	K4+K27	Non-CIMP cancer specific
cg09186006	SLC16A12	387700	0.218778	0.675025	1.04015e-06	K4	Non-CIMP cancer specific
cg10149836	RAB11FIP4	84440	0.209694	0.529893	1.04015e-06	K4	Non-CIMP cancer specific
cg11673092	ARMC3	219681	0.139634	0.408591	1.04015e-06	K4	Non-CIMP cancer specific
cg13562911	ELOVL2	54898	0.106109	0.644574	1.04015e-06	K4+K27	Non-CIMP cancer specific
cg13921352	FAM19A4	151647	0.197256	0.641344	1.04015e-06	K4+K27	Non-CIMP cancer specific
cg14070647	RSPO2	340419	0.106322	0.552353	1.04015e-06	K4+K27	Non-CIMP cancer specific
cg14135551	DAAM2	23500	0.0408625	0.313678	1.04015e-06	K4+K27	Non-CIMP cancer specific
cg14785479	SCARF2	91179	0.232762	0.708169	1.04015e-06	K4+K27	Non-CIMP cancer specific
cg15250797	SCTR	6344	0.239348	0.637823	1.04015e-06	K4+K27	Non-CIMP cancer specific
cg15461516	CHST1	8534	0.0594955	0.495391	1.04015e-06	K4+K27	Non-CIMP cancer specific
cg15731815	RNF207	388591	0.160378	0.580472	1.04015e-06	NA	Non-CIMP cancer specific
cg16098981	TMEM90B	79953	0.106559	0.588528	1.04015e-06	K4+K27	Non-CIMP cancer specific
cg17241310	BARHL2	343472	0.210843	0.619997	1.04015e-06	K27	Non-CIMP cancer specific
cg17279839	RARRES2	5919	0.327566	0.611772	1.04015e-06	K4	Non-CIMP cancer specific
cg17471928	STAC2	342667	0.225656	0.646588	1.04015e-06	K4+K27	Non-CIMP cancer specific
cg18089852	PDE8B	8622	0.163953	0.610025	1.04015e-06	K4+K27	Non-CIMP cancer specific
cg18765542	DGKZ	8525	0.109443	0.423372	1.04015e-06	NA	Non-CIMP cancer specific
cg18952647	BNC1	646	0.227598	0.650568	1.04015e-06	K4+K27	Non-CIMP cancer specific
cg19764436	GNAZ	2781	0.0620869	0.349692	1.04015e-06	K4+K27	Non-CIMP cancer specific
cg20640433	LAMA2	3908	0.214329	0.629926	1.04015e-06	K4	Non-CIMP cancer specific
cg20895877	PRIMA1	145270	0.10611	0.422969	1.04015e-06	K4+K27	Non-CIMP cancer specific
cg22029275	FAM123A	219287	0.237783	0.778953	1.04015e-06	K4+K27	Non-CIMP cancer specific
cg22131691	PDE1C	5137	0.191221	0.567639	1.04015e-06	K4+K27	Non-CIMP cancer specific
cg22418909	SFRP1	6422	0.464976	0.730309	1.04015e-06	K4+K27	Non-CIMP cancer specific
cg22679003	CDH2	1000	0.0565702	0.475586	1.04015e-06	K4	Non-CIMP cancer specific
cg22821324	GPM6A	2823	0.0978006	0.542735	1.04015e-06	K4	Non-CIMP cancer specific
cg23043245	PACSIN1	29993	0.170636	0.429653	1.04015e-06	K4	Non-CIMP cancer specific
cg25044651	LVRN	206338	0.402627	0.680116	1.04015e-06	None	Non-CIMP cancer specific
cg26035366	LRRC3B	116135	0.1678	0.54792	1.04015e-06	K4+K27	Non-CIMP cancer specific
cg26205131	SLC6A3	6531	0.043285	0.365111	1.04015e-06	K4+K27	Non-CIMP cancer specific
cg26309134	ZNF542	147947	0.141141	0.740062	1.04015e-06	NA	Non-CIMP cancer specific
cg26590537	KCNA1	3736	0.0994242	0.535847	1.04015e-06	K4+K27	Non-CIMP cancer specific
cg00351011	LASS4	79603	0.0217173	0.328532	1.24452e-06	K4	Non-CIMP cancer specific
cg00554682	ZNF804A	91752	0.0481591	0.362722	1.24452e-06	K4+K27	Non-CIMP cancer specific
cg00685836	PPFIA2	8499	0.0407425	0.364108	1.24452e-06	K4+K27	Non-CIMP cancer specific
cg00708598	LECT1	11061	0.309498	0.572926	1.24452e-06	K4	Non-CIMP cancer specific
cg01580681	HAND2	9464	0.291337	0.645144	1.24452e-06	K4+K27	Non-CIMP cancer specific
cg01683883	CMTM2	146225	0.252438	0.720619	1.24452e-06	K4+K27	Non-CIMP cancer specific
cg01722994	GRIN2A	2903	0.11923	0.500539	1.24452e-06	NA	Non-CIMP cancer specific
cg01806928	SYT9	143425	0.317053	0.60059	1.24452e-06	K4+K27	Non-CIMP cancer specific
cg02720618	ESR1	2099	0.05529	0.404085	1.24452e-06	K4+K27	Non-CIMP cancer specific
cg03028472	RERG	85004	0.0704739	0.462803	1.24452e-06	K4	Non-CIMP cancer specific
cg03425110	NEUROG3	50674	0.150147	0.489848	1.24452e-06	K4+K27	Non-CIMP cancer specific
cg04551925	AQP1	358	0.540239	0.808049	1.24452e-06	None	Non-CIMP cancer specific
cg04765277	FLJ45983	399717	0.2392	0.554244	1.24452e-06	K4+K27	Non-CIMP cancer specific
cg04784672	LRFN5	145581	0.233868	0.697071	1.24452e-06	K4+K27	Non-CIMP cancer specific
cg04878152	AGTR1	185	0.182264	0.52835	1.24452e-06	K4+K27	Non-CIMP cancer specific
cg05056120	EBF1	1879	0.106238	0.427126	1.24452e-06	NA	Non-CIMP cancer specific
cg05368341	SYT6	148281	0.0696294	0.452639	1.24452e-06	K4+K27	Non-CIMP cancer specific
cg06291867	HTR7	3363	0.322862	0.66266	1.24452e-06	K4+K27	Non-CIMP cancer specific
cg06490988	GATA2	2624	0.284868	0.661315	1.24452e-06	K27	Non-CIMP cancer specific
cg07384961	CLDN6	9074	0.0285954	0.280024	1.24452e-06	K4	Non-CIMP cancer specific
cg07629017	NPBWR1	2831	0.0891087	0.389827	1.24452e-06	NA	Non-CIMP cancer specific
cg08009622	COL12A1	1303	0.102885	0.426187	1.24452e-06	NA	Non-CIMP cancer specific
cg08045570	FOXF2	2295	0.112753	0.538964	1.24452e-06	K27	Non-CIMP cancer specific
cg10520887	UNC5C	8633	0.12167	0.567187	1.24452e-06	K4+K27	Non-CIMP cancer specific
cg10771262	TCF21	6943	0.243909	0.450727	1.24452e-06	K4+K27	Non-CIMP cancer specific
cg12238343	RXFP3	51289	0.120901	0.482762	1.24452e-06	K4+K27	Non-CIMP cancer specific
cg12832649	SPOCK1	6695	0.102692	0.603108	1.24452e-06	K4+K27	Non-CIMP cancer specific
cg12880658	CDO1	1036	0.223159	0.639798	1.24452e-06	K4+K27	Non-CIMP cancer specific
cg13315147	CYP2E1	1571	0.370127	0.6915	1.24452e-06	K4	Non-CIMP cancer specific
cg14724613	GRM3	2913	0.0811475	0.336278	1.24452e-06	K4+K27	Non-CIMP cancer specific
cg15202954	NALCN	259232	0.353185	0.762432	1.24452e-06	K4+K27	Non-CIMP cancer specific
cg16415058	SORCS1	114815	0.253613	0.592497	1.24452e-06	K4+K27	Non-CIMP cancer specific
cg16670497	GSTM2	2946	0.073894	0.44057	1.24452e-06	None	Non-CIMP cancer specific
cg16884569	RASSF2	9770	0.0268601	0.358196	1.24452e-06	K4+K27	Non-CIMP cancer specific
cg17194182	EPO	2056	0.0426696	0.441321	1.24452e-06	K4+K27	Non-CIMP cancer specific
cg19456540	SIX6	4990	0.257866	0.692273	1.24452e-06	K4+K27	Non-CIMP cancer specific
cg19797376	TAL1	6886	0.144662	0.420329	1.24452e-06	K4+K27	Non-CIMP cancer specific
cg21301440	CYGB	114757	0.286617	0.598905	1.24452e-06	NA	Non-CIMP cancer specific
cg22411207	MOS	4342	0.197241	0.438102	1.24452e-06	None	Non-CIMP cancer specific
cg24690731	SOX7	83595	0.187388	0.510326	1.24452e-06	NA	Non-CIMP cancer specific
cg26523005	ZNF662	389114	0.406265	0.66776	1.24452e-06	None	Non-CIMP cancer specific
cg26557658	FAM43B	163933	0.155244	0.460442	1.24452e-06	K4+K27	Non-CIMP cancer specific
cg26609631	GSX1	219409	0.394253	0.683198	1.24452e-06	K27	Non-CIMP cancer specific
cg27560864	SCN4B	6330	0.320719	0.549491	1.24452e-06	NA	Non-CIMP cancer specific
cg27634151	GPR83	10888	0.290819	0.560435	1.24452e-06	K4+K27	Non-CIMP cancer specific
cg00243313	IRX4	50805	0.0856817	0.510314	1.53452e-06	NA	Non-CIMP cancer specific
cg00512279	SLC18A2	6571	0.0531918	0.465087	1.53452e-06	K4+K27	Non-CIMP cancer specific
cg01404615	DKK2	27123	0.109012	0.439369	1.53452e-06	NA	Non-CIMP cancer specific
cg01410472	CRISPLD1	83690	0.232892	0.510227	1.53452e-06	K4	Non-CIMP cancer specific
cg02916816	JPH4	84502	0.142679	0.406868	1.53452e-06	K4+K27	Non-CIMP cancer specific
cg03382304	JAM2	58494	0.0959496	0.571904	1.53452e-06	K4+K27	Non-CIMP cancer specific
cg03889226	OLIG3	167826	0.0803913	0.36338	1.53452e-06	K4+K27	Non-CIMP cancer specific
cg04283938	2011-09-03	55964	0.0394976	0.249857	1.53452e-06	K4	Non-CIMP cancer specific
cg04907257	ADCY2	108	0.401247	0.649833	1.53452e-06	NA	Non-CIMP cancer specific
cg05158615	NPY	4852	0.331068	0.662243	1.53452e-06	K4+K27	Non-CIMP cancer specific
cg06243556	ZSCAN18	65982	0.0574154	0.55966	1.53452e-06	K4	Non-CIMP cancer specific
cg06357925	PTPRO	5800	0.0829779	0.485855	1.53452e-06	K4+K27	Non-CIMP cancer specific
cg07845390	KCNT2	343450	0.117467	0.404838	1.53452e-06	K4	Non-CIMP cancer specific
cg09979256	RSPO3	84870	0.0299469	0.447878	1.53452e-06	K4+K27	Non-CIMP cancer specific
cg11822659	DOK5	55816	0.206649	0.571496	1.53452e-06	K4+K27	Non-CIMP cancer specific
cg14174099	SLC8A3	6547	0.025758	0.443493	1.53452e-06	K4+K27	Non-CIMP cancer specific
cg14197923	FGF5	2250	0.0331823	0.522587	1.53452e-06	K4+K27	Non-CIMP cancer specific
cg14289985	ZNF471	57573	0.180727	0.513915	1.53452e-06	K4	Non-CIMP cancer specific
cg15425280	GRIA2	2891	0.205892	0.517012	1.53452e-06	K4+K27	Non-CIMP cancer specific
cg15591678	ZNF365	22891	0.0285961	0.293425	1.53452e-06	K4+K27	Non-CIMP cancer specific
cg15883716	ANKRD45	339416	0.161498	0.473342	1.53452e-06	K4	Non-CIMP cancer specific
cg17453778	CASR	846	0.169147	0.502907	1.53452e-06	K4+K27	Non-CIMP cancer specific
cg17560332	BOLL	66037	0.218075	0.569751	1.53452e-06	NA	Non-CIMP cancer specific
cg18110483	THBS4	7060	0.14335	0.478574	1.53452e-06	K4+K27	Non-CIMP cancer specific
cg18150721	EPHB1	2047	0.021302	0.365668	1.53452e-06	K4+K27	Non-CIMP cancer specific
cg18335068	ZNF677	342926	0.226828	0.622289	1.53452e-06	K4	Non-CIMP cancer specific
cg19246110	ZNF671	79891	0.232487	0.64328	1.53452e-06	K4	Non-CIMP cancer specific
cg20083676	S1PR3	1903	0.490929	0.743663	1.53452e-06	K4	Non-CIMP cancer specific
cg20329958	CRH	1392	0.198384	0.471287	1.53452e-06	K4+K27	Non-CIMP cancer specific
cg21716693	CPNE5	57699	0.27776	0.587073	1.53452e-06	K4+K27	Non-CIMP cancer specific
cg22187630	CACNA1A	773	0.317379	0.63981	1.53452e-06	K4	Non-CIMP cancer specific
cg22674717	SALL1	6299	0.152964	0.588191	1.53452e-06	K4	Non-CIMP cancer specific
cg23002761	FBLIM1	54751	0.302322	0.657097	1.53452e-06	K4	Non-CIMP cancer specific
cg24715245	UCHL1	7345	0.22584	0.643197	1.53452e-06	K4	Non-CIMP cancer specific
cg25014318	GLP1R	2740	0.126303	0.551367	1.53452e-06	K4+K27	Non-CIMP cancer specific
cg26219051	SCUBE1	80274	0.223015	0.53442	1.53452e-06	K4+K27	Non-CIMP cancer specific
cg00338702	CHFR	55743	0.108517	0.517497	1.92508e-06	K4	Non-CIMP cancer specific
cg00638514	OTOP3	347741	0.0847509	0.401457	1.92508e-06	K4+K27	Non-CIMP cancer specific
cg00687686	NDRG4	65009	0.0480042	0.502984	1.92508e-06	K4+K27	Non-CIMP cancer specific
cg00995520	KCNA3	3738	0.341197	0.59442	1.92508e-06	NA	Non-CIMP cancer specific
cg03238797	ADAMTS18	170692	0.160441	0.573389	1.92508e-06	K4+K27	Non-CIMP cancer specific
cg03285457	LBX1	10660	0.103255	0.453099	1.92508e-06	K27	Non-CIMP cancer specific
cg03455458	VASH2	79805	0.0242809	0.24233	1.92508e-06	K4+K27	Non-CIMP cancer specific
cg03556497	SLC32A1	140679	0.201432	0.452987	1.92508e-06	K4+K27	Non-CIMP cancer specific
cg03775422	VSTM2A	222008	0.128281	0.497046	1.92508e-06	K4+K27	Non-CIMP cancer specific
cg03958979	NR2E1	7101	0.460114	0.760287	1.92508e-06	NA	Non-CIMP cancer specific
cg04034767	GRASP	160622	0.0916954	0.700828	1.92508e-06	K4+K27	Non-CIMP cancer specific
cg10261191	MGC39545	403312	0.281397	0.570421	1.92508e-06	K4+K27	Non-CIMP cancer specific
cg11038843	B3GAT1	27087	0.19306	0.579986	1.92508e-06	K4	Non-CIMP cancer specific
cg11939071	DTX1	1840	0.203712	0.575649	1.92508e-06	NA	Non-CIMP cancer specific
cg12109455	DPYSL4	10570	0.306148	0.602674	1.92508e-06	K4	Non-CIMP cancer specific
cg13297960	NCAM2	4685	0.21513	0.560435	1.92508e-06	K4+K27	Non-CIMP cancer specific
cg13958426	C1orf114	57821	0.109376	0.520272	1.92508e-06	K4	Non-CIMP cancer specific
cg15337897	FGF3	2248	0.287372	0.630537	1.92508e-06	K27	Non-CIMP cancer specific
cg15729869	BARHL1	56751	0.0155874	0.242223	1.92508e-06	K27	Non-CIMP cancer specific
cg16257091	BDNF	627	0.0582495	0.436408	1.92508e-06	NA	Non-CIMP cancer specific
cg16787600	SORCS3	22986	0.380627	0.783541	1.92508e-06	K4+K27	Non-CIMP cancer specific
cg18722841	PHOX2A	401	0.324837	0.645772	1.92508e-06	K4+K27	Non-CIMP cancer specific
cg19718882	WIT1	51352	0.286205	0.608399	1.92508e-06	NA	Non-CIMP cancer specific
cg22007439	DMRTA1	63951	0.0208045	0.313134	1.92508e-06	K4	Non-CIMP cancer specific
cg22392666	FXYD7	53822	0.16008	0.420645	1.92508e-06	K4	Non-CIMP cancer specific
cg22766145	BHLHE22	27319	0.123006	0.356309	1.92508e-06	K4+K27	Non-CIMP cancer specific
cg23239039	D4S234E	27065	0.163724	0.543178	1.92508e-06	K4+K27	Non-CIMP cancer specific
cg24673765	HSPB6	126393	0.269797	0.4939	1.92508e-06	K4	Non-CIMP cancer specific
cg24890043	TMEM163	81615	0.0555645	0.472495	1.92508e-06	K4+K27	Non-CIMP cancer specific
cg25720804	TLX3	30012	0.320144	0.68254	1.92508e-06	K4+K27	Non-CIMP cancer specific
cg25763788	HTR1B	3351	0.183743	0.516264	1.92508e-06	K4	Non-CIMP cancer specific
cg25971347	FOXF1	2294	0.0728224	0.478659	1.92508e-06	K27	Non-CIMP cancer specific
cg26164310	LPPR4	9890	0.105749	0.550161	1.92508e-06	K4	Non-CIMP cancer specific
cg26620959	SYNE1	23345	0.142468	0.481315	1.92508e-06	K4+K27	Non-CIMP cancer specific
cg26705553	MMP25	64386	0.0580389	0.36107	1.92508e-06	K4	Non-CIMP cancer specific
cg26918645	ZNF285A	26974	0.0525903	0.38088	1.92508e-06	NA	Non-CIMP cancer specific
cg00015770	QRFPR	84109	0.326929	0.611026	2.32716e-06	K4+K27	Non-CIMP cancer specific
cg01830294	WNT2	7472	0.307361	0.730893	2.32716e-06	K4+K27	Non-CIMP cancer specific
cg03038003	BEND5	79656	0.0227005	0.448959	2.32716e-06	K4	Non-CIMP cancer specific
cg03294619	NKX2-5	1482	0.0345462	0.311363	2.32716e-06	K27	Non-CIMP cancer specific
cg03755123	UTF1	8433	0.430745	0.675145	2.32716e-06	K4	Non-CIMP cancer specific
cg04270799	KIF5A	3798	0.126641	0.49428	2.32716e-06	K4	Non-CIMP cancer specific
cg04603031	CHRNA3	1136	0.22405	0.56539	2.32716e-06	K4+K27	Non-CIMP cancer specific
cg06165395	GRIK3	2899	0.261899	0.566698	2.32716e-06	NA	Non-CIMP cancer specific
cg06277657	DGKI	9162	0.404945	0.703406	2.32716e-06	NA	Non-CIMP cancer specific
cg06423920	FEZF2	55079	0.155618	0.437869	2.32716e-06	K4+K27	Non-CIMP cancer specific
cg07028533	CNTNAP2	26047	0.136204	0.535301	2.32716e-06	K4+K27	Non-CIMP cancer specific
cg07675169	NKAIN4	128414	0.283713	0.53914	2.32716e-06	K4+K27	Non-CIMP cancer specific
cg07846220	LAMA1	284217	0.383623	0.70486	2.32716e-06	K4	Non-CIMP cancer specific
cg08623947	HCK	3055	0.0458377	0.398526	2.32716e-06	K4+K27	Non-CIMP cancer specific
cg09829319	GCM2	9247	0.128497	0.535763	2.32716e-06	K4+K27	Non-CIMP cancer specific
cg10484958	PCDH8	5100	0.153626	0.392225	2.32716e-06	NA	Non-CIMP cancer specific
cg12645220	PAK7	57144	0.195973	0.523682	2.32716e-06	K4+K27	Non-CIMP cancer specific
cg13749822	HHIP	64399	0.111554	0.456124	2.32716e-06	NA	Non-CIMP cancer specific
cg14021073	BRSK2	9024	0.0950649	0.408082	2.32716e-06	NA	Non-CIMP cancer specific
cg14659404	ASTN1	460	0.191842	0.524049	2.32716e-06	K4+K27	Non-CIMP cancer specific
cg14893163	PCDH17	27253	0.236496	0.591173	2.32716e-06	K4+K27	Non-CIMP cancer specific
cg15156078	RASGRF1	5923	0.207672	0.575727	2.32716e-06	NA	Non-CIMP cancer specific
cg16708281	FOXD4L1	200350	0.278115	0.505828	2.32716e-06	NA	Non-CIMP cancer specific
cg19591881	CD34	947	0.21229	0.618291	2.32716e-06	K4+K27	Non-CIMP cancer specific
cg20073553	NKX3-2	579	0.177684	0.563508	2.32716e-06	K4+K27	Non-CIMP cancer specific
cg20312228	CCDC37	348807	0.330896	0.614378	2.32716e-06	K4+K27	Non-CIMP cancer specific
cg20831708	SEC31B	25956	0.643074	0.866301	2.32716e-06	K4	Non-CIMP cancer specific
cg21696393	SOX8	30812	0.318207	0.630244	2.32716e-06	NA	Non-CIMP cancer specific
cg22284975	C7orf11	136647	0.0832243	0.300588	2.32716e-06	K4	Non-CIMP cancer specific
cg22461835	ADRA1A	148	0.208097	0.514344	2.32716e-06	K4+K27	Non-CIMP cancer specific
cg22598028	ZNF660	285349	0.157247	0.609099	2.32716e-06	K4	Non-CIMP cancer specific
cg24110050	TCTEX1D1	200132	0.200599	0.481618	2.32716e-06	K4	Non-CIMP cancer specific
cg26033710	TACR1	6869	0.242756	0.495108	2.32716e-06	K4+K27	Non-CIMP cancer specific
cg00557354	ARHGEF7	8874	0.0326832	0.420901	2.80653e-06	K4	Non-CIMP cancer specific
cg02161900	MKX	283078	0.324502	0.591423	2.80653e-06	NA	Non-CIMP cancer specific
cg05684891	DAB2IP	153090	0.0493271	0.506797	2.80653e-06	NA	Non-CIMP cancer specific
cg06675478	SOX1	6656	0.404877	0.615972	2.80653e-06	K27	Non-CIMP cancer specific
cg06781209	FADS2	9415	0.134378	0.518329	2.80653e-06	NA	Non-CIMP cancer specific
cg06971096	PTPRN	5798	0.341713	0.656889	2.80653e-06	K4+K27	Non-CIMP cancer specific
cg07494047	ZNF304	57343	0.0388783	0.504194	2.80653e-06	K4	Non-CIMP cancer specific
cg08001895	EPHA7	2045	0.0537297	0.43308	2.80653e-06	K4+K27	Non-CIMP cancer specific
cg08422599	KCNIP1	30820	0.33048	0.614754	2.80653e-06	K4+K27	Non-CIMP cancer specific
cg08441170	MYO3A	53904	0.253436	0.68229	2.80653e-06	K4	Non-CIMP cancer specific
cg08788717	STK33	65975	0.0232059	0.412644	2.80653e-06	K4	Non-CIMP cancer specific
cg09542111	GRIK1	2897	0.157421	0.499013	2.80653e-06	K4+K27	Non-CIMP cancer specific
cg12052765	CHAT	1103	0.185974	0.501372	2.80653e-06	NA	Non-CIMP cancer specific
cg13549845	GRID2	2895	0.220218	0.509632	2.80653e-06	K4	Non-CIMP cancer specific
cg14614901	TMEM215	401498	0.241512	0.524725	2.80653e-06	K4+K27	Non-CIMP cancer specific
cg14958635	NEUROG1	4762	0.206371	0.585687	2.80653e-06	K4+K27	Non-CIMP cancer specific
cg15183083	KCNA4	3739	0.293097	0.577523	2.80653e-06	K4+K27	Non-CIMP cancer specific
cg15628498	ONECUT1	3175	0.0138628	0.234678	2.80653e-06	NA	Non-CIMP cancer specific
cg15736338	FAM19A2	338811	0.0481654	0.251359	2.80653e-06	K4+K27	Non-CIMP cancer specific
cg15868302	FOXD2	2306	0.299588	0.599988	2.80653e-06	NA	Non-CIMP cancer specific
cg17412258	DLK1	8788	0.144101	0.443355	2.80653e-06	K4+K27	Non-CIMP cancer specific
cg17619823	ADRB3	155	0.14887	0.525676	2.80653e-06	K4+K27	Non-CIMP cancer specific
cg18396533	DYDC1	143241	0.267689	0.572417	2.80653e-06	K4	Non-CIMP cancer specific
cg19427610	WIF1	11197	0.210422	0.5964	2.80653e-06	K4+K27	Non-CIMP cancer specific
cg20357628	PHACTR3	116154	0.144823	0.54881	2.80653e-06	K4+K27	Non-CIMP cancer specific
cg21715963	C1orf51	148523	0.0895657	0.345242	2.80653e-06	K4+K27	Non-CIMP cancer specific
cg21902544	CBLN2	147381	0.159672	0.560129	2.80653e-06	K4+K27	Non-CIMP cancer specific
cg23694248	PTPRR	5801	0.234735	0.634044	2.80653e-06	K4+K27	Non-CIMP cancer specific
cg00848728	DAB1	1600	0.16048	0.494574	3.32953e-06	K4+K27	Non-CIMP cancer specific
cg01775414	PHF21B	112885	0.0840312	0.487548	3.32953e-06	K4	Non-CIMP cancer specific
cg02364642	GEFT	115557	0.21164	0.478458	3.32953e-06	K4+K27	Non-CIMP cancer specific
cg03975694	ZNF540	163255	0.403923	0.668143	3.32953e-06	K4	Non-CIMP cancer specific
cg04391111	TP73	7161	0.0742215	0.496768	3.32953e-06	NA	Non-CIMP cancer specific
cg04599297	GAD2	2572	0.230302	0.553392	3.32953e-06	K4+K27	Non-CIMP cancer specific
cg05714219	GALNT14	79623	0.0413087	0.484859	3.32953e-06	K4+K27	Non-CIMP cancer specific
cg05932408	PTGIS	5740	0.117971	0.586001	3.32953e-06	K4	Non-CIMP cancer specific
cg06621358	CELSR3	1951	0.392719	0.636546	3.32953e-06	K4	Non-CIMP cancer specific
cg07260592	LPA	4018	0.524822	0.747049	3.32953e-06	NA	Non-CIMP cancer specific
cg07480567	HS3ST3A1	9955	0.203453	0.550447	3.32953e-06	K4+K27	Non-CIMP cancer specific
cg08383315	RIC3	79608	0.314118	0.623205	3.32953e-06	K4	Non-CIMP cancer specific
cg08453021	ELMO1	9844	0.0792661	0.485658	3.32953e-06	K4	Non-CIMP cancer specific
cg10764357	BCAT1	586	0.179756	0.510302	3.32953e-06	K4	Non-CIMP cancer specific
cg12153542	REM1	28954	0.166391	0.436763	3.32953e-06	K4+K27	Non-CIMP cancer specific
cg13547644	ACTA1	58	0.273396	0.669399	3.32953e-06	K4+K27	Non-CIMP cancer specific
cg13707560	NME5	8382	0.136055	0.484061	3.32953e-06	K4	Non-CIMP cancer specific
cg14262937	OPRM1	4988	0.308621	0.571602	3.32953e-06	K4+K27	Non-CIMP cancer specific
cg15501381	NGB	58157	0.468465	0.731676	3.32953e-06	K4+K27	Non-CIMP cancer specific
cg17671157	KCNK10	54207	0.073561	0.408315	3.32953e-06	K4+K27	Non-CIMP cancer specific
cg18671950	FBN1	2200	0.255016	0.619551	3.32953e-06	K4+K27	Non-CIMP cancer specific
cg19018097	SNX32	254122	0.0796841	0.472302	3.32953e-06	K4	Non-CIMP cancer specific
cg19343464	GRIA4	2893	0.254498	0.652626	3.32953e-06	K4+K27	Non-CIMP cancer specific
cg20256494	CABP7	164633	0.121475	0.448548	3.32953e-06	K27	Non-CIMP cancer specific
cg20291049	POU3F3	5455	0.298599	0.682698	3.32953e-06	K27	Non-CIMP cancer specific
cg20339230	ST8SIA2	8128	0.064102	0.59799	3.32953e-06	K4+K27	Non-CIMP cancer specific
cg20881910	NTM	50863	0.289813	0.710228	3.32953e-06	K4	Non-CIMP cancer specific
cg21176048	PEX5L	51555	0.144309	0.46107	3.32953e-06	NA	Non-CIMP cancer specific
cg22036988	SPSB4	92369	0.0901388	0.523018	3.32953e-06	K4+K27	Non-CIMP cancer specific
cg23326689	STMN2	11075	0.356595	0.619223	3.32953e-06	K4+K27	Non-CIMP cancer specific
cg26232187	NTRK3	4916	0.0152113	0.223575	3.32953e-06	K4+K27	Non-CIMP cancer specific
cg27114120	PROKR2	128674	0.275487	0.59688	3.32953e-06	NA	Non-CIMP cancer specific
cg00107187	TMEM179	388021	0.279361	0.525703	3.9894e-06	K4	Non-CIMP cancer specific
cg00472814	ADAMTS1	9510	0.0775316	0.530428	3.9894e-06	K4	Non-CIMP cancer specific
cg01049530	BMP3	651	0.0391718	0.431204	3.9894e-06	K4+K27	Non-CIMP cancer specific
cg01555431	AKAP12	9590	0.224513	0.620173	3.9894e-06	K4	Non-CIMP cancer specific
cg02257405	ACSL6	23305	0.394123	0.658388	3.9894e-06	K4+K27	Non-CIMP cancer specific
cg04278702	HTR1E	3354	0.204684	0.550742	3.9894e-06	K4+K27	Non-CIMP cancer specific
cg04945541	FMNL1	752	0.250969	0.461846	3.9894e-06	K4	Non-CIMP cancer specific
cg07017374	FLT3	2322	0.0715643	0.52805	3.9894e-06	K4+K27	Non-CIMP cancer specific
cg07200280	RFTN1	23180	0.0602282	0.354911	3.9894e-06	K4+K27	Non-CIMP cancer specific
cg11868900	EFCAB1	79645	0.117023	0.447644	3.9894e-06	K4+K27	Non-CIMP cancer specific
cg12089439	TUSC3	7991	0.212995	0.475905	3.9894e-06	K4	Non-CIMP cancer specific
cg13488201	ADAM12	8038	0.182818	0.635263	3.9894e-06	K4	Non-CIMP cancer specific
cg14056644	PITX2	5308	0.207659	0.550877	3.9894e-06	NA	Non-CIMP cancer specific
cg15279364	TMEM130	222865	0.191205	0.43163	3.9894e-06	K4	Non-CIMP cancer specific
cg17188046	T	6862	0.0767369	0.517339	3.9894e-06	K4+K27	Non-CIMP cancer specific
cg18420965	EPHA5	2044	0.298588	0.684413	3.9894e-06	K4+K27	Non-CIMP cancer specific
cg18453621	LMX1B	4010	0.117361	0.627324	3.9894e-06	K4+K27	Non-CIMP cancer specific
cg18877506	PDPN	10630	0.174846	0.578517	3.9894e-06	NA	Non-CIMP cancer specific
cg21096966	KLHL28	54813	0.235525	0.519179	3.9894e-06	K4	Non-CIMP cancer specific
cg21269934	NAT8L	339983	0.160432	0.522014	3.9894e-06	NA	Non-CIMP cancer specific
cg22463915	EEF1A2	1917	0.431677	0.634997	3.9894e-06	NA	Non-CIMP cancer specific
cg23092823	PODN	127435	0.128795	0.431818	3.9894e-06	K4+K27	Non-CIMP cancer specific
cg24924779	KCNG1	3755	0.165846	0.621011	3.9894e-06	K4+K27	Non-CIMP cancer specific
cg25604883	AK5	26289	0.0441205	0.413691	3.9894e-06	NA	Non-CIMP cancer specific
cg25668368	KCNH7	90134	0.196329	0.420408	3.9894e-06	NA	Non-CIMP cancer specific
cg01643580	KCNK3	3777	0.2514	0.51867	4.75308e-06	K4+K27	Non-CIMP cancer specific
cg02620013	MLNR	2862	0.402547	0.693968	4.75308e-06	K4+K27	Non-CIMP cancer specific
cg02757432	GPR26	2849	0.531765	0.734197	4.75308e-06	K4+K27	Non-CIMP cancer specific
cg03168582	DMRT1	1761	0.0640228	0.615876	4.75308e-06	K4+K27	Non-CIMP cancer specific
cg03513163	PCDHB1	29930	0.222164	0.470692	4.75308e-06	K4+K27	Non-CIMP cancer specific
cg04527918	UCN	7349	0.524335	0.776434	4.75308e-06	K4+K27	Non-CIMP cancer specific
cg09276363	KCND3	3752	0.240577	0.459089	4.75308e-06	K4+K27	Non-CIMP cancer specific
cg10235817	ADRA2C	152	0.422611	0.658216	4.75308e-06	K4	Non-CIMP cancer specific
cg10298815	GPR88	54112	0.193208	0.525354	4.75308e-06	K4+K27	Non-CIMP cancer specific
cg10362591	SLC6A2	6530	0.360433	0.730443	4.75308e-06	NA	Non-CIMP cancer specific
cg11525285	VSX2	338917	0.276566	0.604653	4.75308e-06	K4+K27	Non-CIMP cancer specific
cg12582959	CCDC106	29903	0.22069	0.607055	4.75308e-06	K4	Non-CIMP cancer specific
cg13108181	ZNF141	7700	0.0301747	0.252253	4.75308e-06	NA	Non-CIMP cancer specific
cg17525406	AJAP1	55966	0.376846	0.790742	4.75308e-06	K4+K27	Non-CIMP cancer specific
cg17530977	GLI3	2737	0.0401027	0.272912	4.75308e-06	K4	Non-CIMP cancer specific
cg17945001	IGSF21	84966	0.0969367	0.315068	4.75308e-06	K4+K27	Non-CIMP cancer specific
cg19162158	NRG1	3084	0.0852078	0.563189	4.75308e-06	K4+K27	Non-CIMP cancer specific
cg19896198	TNFRSF8	943	0.170162	0.486755	4.75308e-06	K4+K27	Non-CIMP cancer specific
cg20786074	EFEMP1	2202	0.395932	0.6429	4.75308e-06	K4+K27	Non-CIMP cancer specific
cg20804555	GSC	145258	0.0876981	0.44175	4.75308e-06	K4+K27	Non-CIMP cancer specific
cg21053529	GJD2	57369	0.328386	0.631047	4.75308e-06	K4+K27	Non-CIMP cancer specific
cg22572159	NGF	4803	0.129388	0.501135	4.75308e-06	K4+K27	Non-CIMP cancer specific
cg23040064	JPH3	57338	0.053142	0.344405	4.75308e-06	NA	Non-CIMP cancer specific
cg24512303	HNF4G	3174	0.454927	0.691437	4.75308e-06	None	Non-CIMP cancer specific
cg26747293	EGFLAM	133584	0.0537847	0.533736	4.75308e-06	K4+K27	Non-CIMP cancer specific
cg27092035	ARL10	285598	0.0425577	0.331762	4.75308e-06	K4+K27	Non-CIMP cancer specific
cg27286999	OLFM1	10439	0.0720676	0.327092	4.75308e-06	K4+K27	Non-CIMP cancer specific
cg01313514	WNT3A	89780	0.124066	0.396495	5.70718e-06	K4+K27	Non-CIMP cancer specific
cg01661993	TTYH1	57348	0.148523	0.517295	5.70718e-06	K4+K27	Non-CIMP cancer specific
cg03469054	TMEM132D	121256	0.332284	0.605605	5.70718e-06	K4	Non-CIMP cancer specific
cg03495868	PTGFR	5737	0.256285	0.518944	5.70718e-06	K4+K27	Non-CIMP cancer specific
cg04801003	ANTXR1	84168	0.0694133	0.351322	5.70718e-06	K4	Non-CIMP cancer specific
cg07570142	MOXD1	26002	0.0870989	0.55028	5.70718e-06	K4+K27	Non-CIMP cancer specific
cg09009380	PKP1	5317	0.452309	0.714119	5.70718e-06	K27	Non-CIMP cancer specific
cg10303842	CDH12	1010	0.156882	0.455804	5.70718e-06	K4+K27	Non-CIMP cancer specific
cg10757144	PCDHB15	56121	0.320468	0.604343	5.70718e-06	K4	Non-CIMP cancer specific
cg11670211	NOX4	50507	0.0788354	0.369489	5.70718e-06	K4	Non-CIMP cancer specific
cg11747771	GLDC	2731	0.0654131	0.549926	5.70718e-06	K4+K27	Non-CIMP cancer specific
cg12448933	RAB37	326624	0.316705	0.636345	5.70718e-06	K4+K27	Non-CIMP cancer specific
cg13206017	SST	6750	0.263263	0.521878	5.70718e-06	K4+K27	Non-CIMP cancer specific
cg15565872	PTX3	5806	0.0256998	0.371041	5.70718e-06	K4+K27	Non-CIMP cancer specific
cg16585682	SCGB3A1	92304	0.0366213	0.274263	5.70718e-06	K27	Non-CIMP cancer specific
cg16969623	ZNF331	55422	0.0331115	0.412649	5.70718e-06	K4	Non-CIMP cancer specific
cg18938204	EMILIN3	90187	0.158461	0.550871	5.70718e-06	K4+K27	Non-CIMP cancer specific
cg20176532	ZNF256	10172	0.0256359	0.509868	5.70718e-06	K4	Non-CIMP cancer specific
cg20624391	BVES	11149	0.211297	0.51047	5.70718e-06	K4+K27	Non-CIMP cancer specific
cg21907579	TBX5	6910	0.269819	0.553216	5.70718e-06	K27	Non-CIMP cancer specific
cg23196831	COL14A1	7373	0.175245	0.49863	5.70718e-06	K4+K27	Non-CIMP cancer specific
cg24723331	ST8SIA1	6489	0.040799	0.373886	5.70718e-06	K4+K27	Non-CIMP cancer specific
cg25935911	DBC1	1620	0.391221	0.60397	5.70718e-06	NA	Non-CIMP cancer specific
cg26489108	DMRT3	58524	0.228981	0.497106	5.70718e-06	NA	Non-CIMP cancer specific
cg26651233	FLRT2	23768	0.248368	0.535483	5.70718e-06	K4+K27	Non-CIMP cancer specific
cg27188703	FAIM2	23017	0.278461	0.7182	5.70718e-06	K4	Non-CIMP cancer specific
cg00393585	C4orf39	152756	0.119068	0.523061	6.82324e-06	K4	Non-CIMP cancer specific
cg02545192	TERT	7015	0.0313821	0.288677	6.82324e-06	None	Non-CIMP cancer specific
cg03945800	ADCY9	115	0.13221	0.345659	6.82324e-06	K4	Non-CIMP cancer specific
cg04583874	LY6H	4062	0.285359	0.587654	6.82324e-06	NA	Non-CIMP cancer specific
cg05389335	TACR3	6870	0.247652	0.528491	6.82324e-06	None	Non-CIMP cancer specific
cg06995715	FOXL1	2300	0.358457	0.717181	6.82324e-06	K4+K27	Non-CIMP cancer specific
cg08831744	IGFBP3	3486	0.118472	0.400356	6.82324e-06	K4+K27	Non-CIMP cancer specific
cg09628601	NPAS1	4861	0.114603	0.461447	6.82324e-06	NA	Non-CIMP cancer specific
cg09688546	GLRB	2743	0.315354	0.628363	6.82324e-06	K4+K27	Non-CIMP cancer specific
cg10332700	ZNF415	55786	0.09802	0.529017	6.82324e-06	K4	Non-CIMP cancer specific
cg12317456	MMP2	4313	0.241373	0.492508	6.82324e-06	K4+K27	Non-CIMP cancer specific
cg13756879	IGF2	3481	0.0908996	0.468904	6.82324e-06	K4+K27	Non-CIMP cancer specific
cg13791131	IGF2AS	51214	0.367946	0.683596	6.82324e-06	K4+K27	Non-CIMP cancer specific
cg16604516	FBLN2	2199	0.233532	0.571823	6.82324e-06	K4	Non-CIMP cancer specific
cg19615059	TRPV4	59341	0.0694377	0.34104	6.82324e-06	K4	Non-CIMP cancer specific
cg21272774	HOXC9	3225	0.252978	0.587704	6.82324e-06	K4+K27	Non-CIMP cancer specific
cg21494776	ICAM4	3386	0.0991437	0.389075	6.82324e-06	K4+K27	Non-CIMP cancer specific
cg23418591	APCDD1L	164284	0.337845	0.612524	6.82324e-06	K4+K27	Non-CIMP cancer specific
cg25239996	CD40	958	0.101302	0.443756	6.82324e-06	K4	Non-CIMP cancer specific
cg25856383	CYP1B1	1545	0.049362	0.419812	6.82324e-06	K4+K27	Non-CIMP cancer specific
cg26043257	CD38	952	0.253936	0.577765	6.82324e-06	K4+K27	Non-CIMP cancer specific
cg00347904	SCUBE3	222663	0.153129	0.518172	8.16812e-06	K4+K27	Non-CIMP cancer specific
cg00902195	SYT10	341359	0.0864081	0.449722	8.16812e-06	K4+K27	Non-CIMP cancer specific
cg01173186	NRSN1	140767	0.255465	0.525276	8.16812e-06	K4	Non-CIMP cancer specific
cg02409351	ALX1	8092	0.0650653	0.368477	8.16812e-06	K4	Non-CIMP cancer specific
cg04418492	CYP7B1	9420	0.0716242	0.423253	8.16812e-06	K4+K27	Non-CIMP cancer specific
cg09147222	CPNE4	131034	0.0951312	0.422809	8.16812e-06	K4+K27	Non-CIMP cancer specific
cg11465971	GSX2	170825	0.058455	0.307011	8.16812e-06	K4+K27	Non-CIMP cancer specific
cg13562542	GPR27	2850	0.168446	0.536115	8.16812e-06	K4+K27	Non-CIMP cancer specific
cg14221171	TAC1	6863	0.150616	0.41214	8.16812e-06	K4+K27	Non-CIMP cancer specific
cg18838701	TNNI3	7137	0.286319	0.507773	8.16812e-06	K4	Non-CIMP cancer specific
cg19135761	WDR8	49856	0.30061	0.610807	8.16812e-06	NA	Non-CIMP cancer specific
cg20209009	TBX21	30009	0.0853481	0.490723	8.16812e-06	K4+K27	Non-CIMP cancer specific
cg20699736	VAX2	25806	0.0625782	0.271301	8.16812e-06	K4+K27	Non-CIMP cancer specific
cg21376883	ACTN2	88	0.381242	0.643238	8.16812e-06	K4+K27	Non-CIMP cancer specific
cg25993718	CBLN4	140689	0.359546	0.66446	8.16812e-06	K4+K27	Non-CIMP cancer specific
cg27140220	PKIA	5569	0.0375821	0.335952	8.16812e-06	K4	Non-CIMP cancer specific
cg05028467	SNCB	6620	0.0316055	0.411862	9.70006e-06	K4	Non-CIMP cancer specific
cg08441806	NKX6-2	84504	0.431925	0.678672	9.70006e-06	K27	Non-CIMP cancer specific
cg12539975	PRDM12	59335	0.068002	0.380473	9.70006e-06	K4+K27	Non-CIMP cancer specific
cg12619509	DNASE1L2	1775	0.351205	0.62192	9.70006e-06	K4+K27	Non-CIMP cancer specific
cg12847373	EDNRB	1910	0.223638	0.486836	9.70006e-06	K4	Non-CIMP cancer specific
cg13226172	CNTFR	1271	0.0344981	0.250777	9.70006e-06	K4+K27	Non-CIMP cancer specific
cg13262687	POU4F2	5458	0.324434	0.599849	9.70006e-06	K4+K27	Non-CIMP cancer specific
cg14323109	KDR	3791	0.285956	0.597427	9.70006e-06	K4	Non-CIMP cancer specific
cg19439399	ELOVL4	6785	0.0955603	0.400259	9.70006e-06	K4	Non-CIMP cancer specific
cg23300372	CARTPT	9607	0.370549	0.638152	9.70006e-06	K4+K27	Non-CIMP cancer specific

## Sheet: Constitutively Low
Supplemental Table 4 - Gene promoter classification among colorectal samples
Probe ID	Gene Symbol	Gene ID	Normal adjacent mean beta-value	Tumor mean beta-value	Normal vs. tumor FDR-adjusted P value	ES cell histone marks	Gene category
cg27497687	MED19	219541	0.0286603	0.0286948	1	K4	Constitutively Low
cg26904212	FXR2	9513	0.126048	0.127469	1	K4	Constitutively Low
cg26272237	CARS2	79587	0.0142915	0.01396	1	K4	Constitutively Low
cg26199493	LIN9	286826	0.0393958	0.0451108	1	K4	Constitutively Low
cg26079320	POGK	57645	0.0752836	0.075456	1	K4	Constitutively Low
cg25920951	FAM70B	348013	0.0211498	0.0215771	1	K4+K27	Constitutively Low
cg25658980	PIH1D1	55011	0.0171736	0.0173633	1	K4	Constitutively Low
cg25084220	MARCH3	115123	0.0217207	0.0220481	1	K4+K27	Constitutively Low
cg24873414	KLHL26	55295	0.0807143	0.0831397	1	NA	Constitutively Low
cg24868525	TRAPPC10	7109	0.0769504	0.0778821	1	NA	Constitutively Low
cg24727203	PPP1R3B	79660	0.0483966	0.0731915	1	K4	Constitutively Low
cg24633242	AKTIP	64400	0.0654869	0.0657045	1	K4	Constitutively Low
cg24408817	CCNL1	57018	0.119472	0.116941	1	K4	Constitutively Low
cg24373308	BAG2	9532	0.0163672	0.017598	1	K4	Constitutively Low
cg24031606	CDC25A	993	0.0223934	0.0234489	1	K4	Constitutively Low
cg23913400	ITGB4	3691	0.0378758	0.0380395	1	K4	Constitutively Low
cg23739036	PEX10	5192	0.0162423	0.016818	1	K4	Constitutively Low
cg23424268	GCHFR	2644	0.0124867	0.0125797	1	K4	Constitutively Low
cg23097681	ARHGAP24	83478	0.0558225	0.0576496	1	K4	Constitutively Low
cg23043438	TEX10	54881	0.0225426	0.0222442	1	K4	Constitutively Low
cg22836370	MBD2	8932	0.0645702	0.0627493	1	K4	Constitutively Low
cg22182110	GOLGB1	2804	0.0539515	0.0547153	1	K4	Constitutively Low
cg22176097	DHRS13	147015	0.0330051	0.0329412	1	K4	Constitutively Low
cg21508214	IFT80	57560	0.0221572	0.021871	1	K4	Constitutively Low
cg21413251	PIP5K1B	8395	0.0146294	0.0144814	1	K4+K27	Constitutively Low
cg21010050	TBC1D23	55773	0.0343562	0.0341886	1	K4	Constitutively Low
cg20913782	C1orf212	113444	0.0291364	0.02951	1	K4	Constitutively Low
cg20426860	TMEM161A	54929	0.0909923	0.0894725	1	K4	Constitutively Low
cg20278498	RPUSD4	84881	0.0643774	0.062865	1	K4	Constitutively Low
cg20264534	CCDC97	90324	0.0482635	0.0481234	1	K4	Constitutively Low
cg20166783	RFC1	5981	0.0212021	0.0213613	1	K4	Constitutively Low
cg20126158	MARCH6	10299	0.0278233	0.0291973	1	K4	Constitutively Low
cg19786920	NSUN7	79730	0.108118	0.138691	1	K4	Constitutively Low
cg19630506	SMTN	6525	0.0168709	0.0178397	1	K4	Constitutively Low
cg19445598	UBA6	55236	0.0221123	0.0220191	1	K4	Constitutively Low
cg19219920	FAM53B	9679	0.0360405	0.035138	1	K4	Constitutively Low
cg19191401	SRGAP1	57522	0.038148	0.0387173	1	K4	Constitutively Low
cg19166875	MYOF	26509	0.105012	0.102329	1	K4+K27	Constitutively Low
cg19108785	CEP72	55722	0.0457992	0.0460767	1	K4	Constitutively Low
cg18556220	FBXW5	54461	0.0625233	0.0645381	1	K4	Constitutively Low
cg18540305	TMCO3	55002	0.0149731	0.0141674	1	K4	Constitutively Low
cg18508125	FBXO16	157574	0.122369	0.127931	1	K4	Constitutively Low
cg17895873	SMYD5	10322	0.0162885	0.0175838	1	K4	Constitutively Low
cg17509872	CNOT7	29883	0.100822	0.104274	1	K4	Constitutively Low
cg17366325	RPL19	6143	0.0525447	0.0526541	1	K4	Constitutively Low
cg17357984	CDC34	997	0.0411919	0.0437087	1	K4	Constitutively Low
cg17240496	UBXN1	51035	0.0215576	0.0215283	1	K4	Constitutively Low
cg16889368	MRPL15	29088	0.0250375	0.0241483	1	K4	Constitutively Low
cg16756620	PPIG	9360	0.0429668	0.040164	1	K4	Constitutively Low
cg16310717	CCND2	894	0.0994487	0.0982007	1	K4	Constitutively Low
cg16063666	TP53TG1	11257	0.0732498	0.0740809	1	K4	Constitutively Low
cg15947959	ERGIC1	57222	0.0917972	0.0919239	1	K4	Constitutively Low
cg15806518	PSMB7	5695	0.0265411	0.0264394	1	K4	Constitutively Low
cg15753381	TAF13	6884	0.0272102	0.02991	1	NA	Constitutively Low
cg15703512	C16orf65	255762	0.0629897	0.0703892	1	None	Constitutively Low
cg15536490	TFAP2C	7022	0.164535	0.220763	1	NA	Constitutively Low
cg15517965	TMUB2	79089	0.022856	0.02353	1	K4	Constitutively Low
cg15500658	SPEN	23013	0.0158548	0.0163174	1	K4	Constitutively Low
cg15492003	SEC61B	10952	0.0223447	0.0222963	1	K4	Constitutively Low
cg15305343	NSUN4	387338	0.0161089	0.0162298	1	K4	Constitutively Low
cg15104484	PEX26	55670	0.0143944	0.0144744	1	K4	Constitutively Low
cg14817542	HIF1AN	55662	0.0205293	0.0205525	1	K4	Constitutively Low
cg14755009	TIRAP	114609	0.024615	0.024814	1	K4	Constitutively Low
cg14585160	ARHGAP1	392	0.0284416	0.0287151	1	K4	Constitutively Low
cg14527802	TNFAIP3	7128	0.0563028	0.0535638	1	K4+K27	Constitutively Low
cg14501253	C8orf79	57604	0.0687663	0.0709767	1	NA	Constitutively Low
cg14492347	ZNF592	9640	0.0353718	0.035876	1	K4	Constitutively Low
cg14296147	CSRP2BP	57325	0.0128736	0.0125123	1	K4	Constitutively Low
cg14104257	SLC36A1	206358	0.0131574	0.0127861	1	K4	Constitutively Low
cg14056942	TSC22D2	9819	0.0409645	0.0408266	1	K4	Constitutively Low
cg14019317	PROX1	5629	0.0801567	0.0790626	1	NA	Constitutively Low
cg13788301	TOM1	10043	0.0151643	0.0143258	1	K4	Constitutively Low
cg13671831	NF2	4771	0.0345467	0.0355413	1	K4	Constitutively Low
cg13552650	MORC3	23515	0.0921929	0.0913881	1	K4	Constitutively Low
cg13516796	ALG1	56052	0.0268024	0.0255006	1	K4	Constitutively Low
cg13501999	CACNB1	782	0.0438183	0.0438872	1	K4	Constitutively Low
cg13382694	ZNF652	22834	0.09783	0.0958161	1	K4	Constitutively Low
cg13237906	SLC26A2	1836	0.0223712	0.0223934	1	K4	Constitutively Low
cg12785087	NAT11	79829	0.0148903	0.0145347	1	NA	Constitutively Low
cg12603043	EHD2	30846	0.0220142	0.0228731	1	K4	Constitutively Low
cg12581035	PHC1	1911	0.018293	0.0181499	1	K4	Constitutively Low
cg12377712	ATP6V1G1	9550	0.0158089	0.0155271	1	K4	Constitutively Low
cg12333095	ANKRD13A	88455	0.0183296	0.0183038	1	K4+K27	Constitutively Low
cg12243255	CSRNP1	64651	0.0138204	0.0138395	1	K4	Constitutively Low
cg12032116	DMXL1	1657	0.0580186	0.0583804	1	NA	Constitutively Low
cg12011267	PPP1R13B	23368	0.0751883	0.0745216	1	NA	Constitutively Low
cg11933375	SLC38A7	55238	0.0790809	0.0804452	1	K4	Constitutively Low
cg11841758	MAGOH	4116	0.100934	0.102272	1	K4	Constitutively Low
cg11828669	ZBTB25	7597	0.0406285	0.0401063	1	K4	Constitutively Low
cg11639397	VASP	7408	0.00950157	0.00933261	1	K4	Constitutively Low
cg11443787	MLLT10	8028	0.0654316	0.0639133	1	NA	Constitutively Low
cg11423990	TXN2	25828	0.0419364	0.0422313	1	K4	Constitutively Low
cg11310692	PEX7	5191	0.0247315	0.0229779	1	K4	Constitutively Low
cg11197066	PGAP1	80055	0.0207524	0.0177014	1	K4	Constitutively Low
cg11010122	DNAJB14	79982	0.0216666	0.0227442	1	NA	Constitutively Low
cg10960946	UBE2I	7329	0.0190207	0.0193387	1	K4	Constitutively Low
cg10957680	IFI6	2537	0.0437298	0.0432478	1	K4	Constitutively Low
cg10944783	PSMC3IP	29893	0.0260109	0.0262217	1	K4	Constitutively Low
cg10624583	TENC1	23371	0.0189013	0.0198273	1	NA	Constitutively Low
cg10239941	MPV17	4358	0.0189706	0.0179227	1	K4	Constitutively Low
cg09558502	OVGP1	5016	0.117532	0.125922	1	None	Constitutively Low
cg09296044	CCNDBP1	23582	0.030076	0.031102	1	K4	Constitutively Low
cg09197965	TUBA4A	7277	0.0342755	0.0339803	1	NA	Constitutively Low
cg08996502	SCRIB	23513	0.106177	0.10852	1	K4	Constitutively Low
cg08810065	G2E3	55632	0.052968	0.0532534	1	K4	Constitutively Low
cg07965839	ZFAND6	54469	0.0525108	0.052723	1	K4	Constitutively Low
cg07955356	DNASE2	1777	0.0557473	0.0543548	1	K4	Constitutively Low
cg07854244	IP6K2	51447	0.0254662	0.0253995	1	K4	Constitutively Low
cg07596494	KIF3C	3797	0.034019	0.0361293	1	K4	Constitutively Low
cg07399355	MUC1	4582	0.0235083	0.0236947	1	K4	Constitutively Low
cg07355551	ZNF343	79175	0.0368805	0.0367243	1	K4+K27	Constitutively Low
cg06887414	RPN1	6184	0.044468	0.0442365	1	K4	Constitutively Low
cg06834261	WDR12	55759	0.0415844	0.041202	1	K4	Constitutively Low
cg06730468	TMEM143	55260	0.0995489	0.0993392	1	K4	Constitutively Low
cg06688396	TMEM55A	55529	0.118101	0.128749	1	K4	Constitutively Low
cg06654447	TMEM141	85014	0.0244715	0.0234812	1	K4	Constitutively Low
cg06541857	CEP63	80254	0.0774821	0.0723696	1	K4	Constitutively Low
cg06077733	UBE2D1	7321	0.0167932	0.0188195	1	K4	Constitutively Low
cg05990214	SPHK2	56848	0.0458275	0.0451577	1	K4	Constitutively Low
cg05937182	ST7	7982	0.0166497	0.01686	1	K4	Constitutively Low
cg05715287	CDC40	51362	0.0689054	0.0688118	1	K4	Constitutively Low
cg05566965	BID	637	0.0422886	0.0426133	1	K4	Constitutively Low
cg05382730	EMG1	10436	0.0275867	0.0277013	1	K4	Constitutively Low
cg04960951	SUV420H2	84787	0.0342235	0.0341666	1	K4	Constitutively Low
cg04619859	C7orf49	78996	0.016025	0.0166524	1	K4	Constitutively Low
cg04498032	CLK2	1196	0.0618594	0.0617735	1	K4	Constitutively Low
cg04496615	PPP3R1	5534	0.0106461	0.0107888	1	K4	Constitutively Low
cg04454391	NDUFAB1	4706	0.0186783	0.018695	1	K4	Constitutively Low
cg04317940	PMS2	5395	0.0265038	0.0256727	1	NA	Constitutively Low
cg04317366	PRPF8	10594	0.0373923	0.0383265	1	K4	Constitutively Low
cg04141379	SPATA6	54558	0.011033	0.00968451	1	K4	Constitutively Low
cg04082985	LASS2	29956	0.0327128	0.034091	1	K4	Constitutively Low
cg03985657	FAM189B	10712	0.0224448	0.0230481	1	K4	Constitutively Low
cg03905094	DEPDC1B	55789	0.0372612	0.0368652	1	K4	Constitutively Low
cg03812067	SERINC3	10955	0.0199907	0.0198001	1	K4	Constitutively Low
cg03737135	HSPA14	51182	0.0564371	0.0564784	1	K4	Constitutively Low
cg03640568	DDX17	10521	0.0150928	0.0147218	1	K4	Constitutively Low
cg03620376	CDC42EP5	148170	0.073463	0.085197	1	K4	Constitutively Low
cg03586029	MFSD8	256471	0.0749652	0.0751781	1	K4	Constitutively Low
cg03389111	KRR1	11103	0.0740963	0.0654414	1	K4	Constitutively Low
cg03322129	UBE2J2	118424	0.0183546	0.0191626	1	K4	Constitutively Low
cg03139057	DLL3	10683	0.02196	0.0219484	1	K4	Constitutively Low
cg02668984	PDK2	5164	0.0330377	0.032238	1	NA	Constitutively Low
cg02644301	TECR	9524	0.0329496	0.0320707	1	K4	Constitutively Low
cg02569086	ITPR2	3709	0.0160528	0.0160714	1	K4	Constitutively Low
cg02277509	TIMM9	26520	0.0252646	0.024764	1	K4	Constitutively Low
cg01931893	TK2	7084	0.0747615	0.078457	1	K4	Constitutively Low
cg01755369	ILF3	3609	0.0398885	0.0394043	1	K4	Constitutively Low
cg01626197	GMPPB	29925	0.0351376	0.0352568	1	K4	Constitutively Low
cg01369981	CAMKK2	10645	0.0152645	0.0449747	1	K4	Constitutively Low
cg01284619	HCN2	610	0.107991	0.109263	1	K27	Constitutively Low
cg01254505	BST2	684	0.0531112	0.0666473	1	K4	Constitutively Low
cg00935430	ZNF678	339500	0.0366829	0.0373787	1	K4	Constitutively Low
cg00718748	ZNF624	57547	0.0442613	0.0441717	1	K4	Constitutively Low
cg00462311	NFATC4	4776	0.118689	0.118874	1	K4	Constitutively Low
cg00381076	C18orf54	162681	0.0266203	0.0261434	1	K4	Constitutively Low
cg00296685	GTF2H4	2968	0.0788758	0.0792636	1	K4	Constitutively Low
cg27611665	FBXL12	54850	0.0154008	0.0145715	0.991664	K4	Constitutively Low
cg27555776	OPTN	10133	0.0196769	0.019166	0.991664	K4	Constitutively Low
cg27431247	CHKA	1119	0.0564483	0.0560853	0.991664	K4	Constitutively Low
cg27144395	FOXN4	121643	0.0457331	0.0456869	0.991664	K4+K27	Constitutively Low
cg26736450	OTX1	5013	0.0347966	0.0358428	0.991664	K4+K27	Constitutively Low
cg26240353	LTA4H	4048	0.0140709	0.0139115	0.991664	K4	Constitutively Low
cg26228569	MED27	9442	0.0580869	0.0579207	0.991664	K4	Constitutively Low
cg26112353	BMP2K	55589	0.0766577	0.0749198	0.991664	NA	Constitutively Low
cg25824330	MRPS18A	55168	0.0234828	0.0233972	0.991664	K4	Constitutively Low
cg25616762	CLPTM1L	81037	0.0407891	0.0426851	0.991664	NA	Constitutively Low
cg25138936	RPL23A	6147	0.0269676	0.0269623	0.991664	K4	Constitutively Low
cg24856732	SCO2	9997	0.113972	0.12152	0.991664	K4	Constitutively Low
cg24801210	PCNP	57092	0.147737	0.145635	0.991664	K4	Constitutively Low
cg24758027	PKIB	5570	0.0369726	0.0337475	0.991664	K4	Constitutively Low
cg24517609	SSR3	6747	0.0770865	0.0770318	0.991664	K4	Constitutively Low
cg24448231	ZNFX1	57169	0.0348692	0.0550756	0.991664	NA	Constitutively Low
cg24306924	GPT2	84706	0.018779	0.0185376	0.991664	K4	Constitutively Low
cg23993660	PINK1	65018	0.0183433	0.0184597	0.991664	K4+K27	Constitutively Low
cg23968678	MBOAT7	79143	0.0365242	0.0376473	0.991664	K4	Constitutively Low
cg23905308	PER2	8864	0.0375002	0.0376576	0.991664	K4	Constitutively Low
cg23866755	CNP	1267	0.0193245	0.0193527	0.991664	K4	Constitutively Low
cg23738770	NFKB2	4791	0.0235406	0.0241724	0.991664	K4	Constitutively Low
cg23543604	TAF12	6883	0.0369617	0.0372777	0.991664	K4	Constitutively Low
cg23393291	LINS1	55180	0.0518353	0.0508155	0.991664	K4	Constitutively Low
cg23266266	DCUN1D4	23142	0.0523584	0.0548257	0.991664	NA	Constitutively Low
cg22721186	ATAD2	29028	0.0241	0.0240082	0.991664	K4	Constitutively Low
cg22459359	ZMYM6	9204	0.00593645	0.00619221	0.991664	K4	Constitutively Low
cg22289810	NF1	4763	0.0838371	0.107254	0.991664	K4	Constitutively Low
cg22088594	FAM48A	55578	0.17693	0.194414	0.991664	K4	Constitutively Low
cg22004151	PPP2R5D	5528	0.0516196	0.0514757	0.991664	K4	Constitutively Low
cg21900416	SERTAD3	29946	0.0227762	0.0225764	0.991664	NA	Constitutively Low
cg21666675	CHCHD4	131474	0.0473154	0.0483535	0.991664	K4	Constitutively Low
cg21639968	UBE2M	9040	0.022519	0.022786	0.991664	K4	Constitutively Low
cg21452766	CTH	1491	0.0468695	0.0481781	0.991664	K4	Constitutively Low
cg21371335	DNAJC7	7266	0.0534991	0.0534171	0.991664	K4	Constitutively Low
cg21329628	CD320	51293	0.0485209	0.0484954	0.991664	K4	Constitutively Low
cg20988728	PIK3IP1	113791	0.0370855	0.0383878	0.991664	K4+K27	Constitutively Low
cg20948472	ZMAT2	153527	0.0470703	0.0479955	0.991664	K4	Constitutively Low
cg20850582	LRBA	987	0.0485597	0.0491725	0.991664	K4	Constitutively Low
cg20812929	DHRS4L2	317749	0.110036	0.117101	0.991664	NA	Constitutively Low
cg20757526	DCXR	51181	0.037698	0.0377107	0.991664	K4	Constitutively Low
cg20728496	NADSYN1	55191	0.0561011	0.0585213	0.991664	NA	Constitutively Low
cg20492121	GLUL	2752	0.0299436	0.0315185	0.991664	K4	Constitutively Low
cg19742789	CCNJL	79616	0.0647166	0.0710336	0.991664	K4	Constitutively Low
cg19615614	CDK2	1017	0.0813071	0.0811755	0.991664	K4	Constitutively Low
cg18997990	SERF2	10169	0.0818014	0.0814707	0.991664	K4	Constitutively Low
cg18963330	OAF	220323	0.0311156	0.0313476	0.991664	K4+K27	Constitutively Low
cg18801292	SUPT16H	11198	0.0227571	0.0227281	0.991664	K4	Constitutively Low
cg18187335	CTTN	2017	0.0432373	0.0423891	0.991664	K4	Constitutively Low
cg17881637	MRPL40	64976	0.0205086	0.0202959	0.991664	K4	Constitutively Low
cg17587934	HNRNPAB	3182	0.0116846	0.0124125	0.991664	K4	Constitutively Low
cg17124509	C17orf57	124989	0.0648042	0.0766471	0.991664	NA	Constitutively Low
cg16793150	MRPS27	23107	0.0189087	0.0188279	0.991664	K4	Constitutively Low
cg16749578	NR2F6	2063	0.0949832	0.0991057	0.991664	NA	Constitutively Low
cg16405575	TSPAN9	10867	0.0515481	0.0516794	0.991664	K4	Constitutively Low
cg16218387	FAM8A1	51439	0.0408719	0.0378485	0.991664	K4	Constitutively Low
cg16199381	TSTD2	158427	0.0313416	0.0296509	0.991664	K4	Constitutively Low
cg15945417	LLGL1	3996	0.0274847	0.0283997	0.991664	K4	Constitutively Low
cg15801967	NHP2L1	4809	0.0383037	0.0379039	0.991664	K4	Constitutively Low
cg14871856	GTF2E2	2961	0.0246639	0.0246578	0.991664	K4	Constitutively Low
cg14733672	HMOX1	3162	0.0260286	0.0259198	0.991664	K4	Constitutively Low
cg14636377	RHEBL1	121268	0.0291995	0.0292605	0.991664	K4+K27	Constitutively Low
cg14489884	MRFAP1L1	114932	0.0250994	0.0245082	0.991664	K4	Constitutively Low
cg13887370	DNAJC14	85406	0.0118253	0.0118311	0.991664	NA	Constitutively Low
cg13802364	RCOR2	283248	0.0301717	0.0334164	0.991664	K4	Constitutively Low
cg13766096	ING1	3621	0.0534281	0.053759	0.991664	K4	Constitutively Low
cg12841020	PGF	5228	0.187563	0.200591	0.991664	K4	Constitutively Low
cg12688215	KTI12	112970	0.0210585	0.0211689	0.991664	K4	Constitutively Low
cg11979382	MEPCE	56257	0.0433699	0.0425517	0.991664	NA	Constitutively Low
cg11717557	AP4B1	10717	0.0332841	0.0326656	0.991664	K4	Constitutively Low
cg11603096	EIF3D	8664	0.0542	0.0537714	0.991664	K4	Constitutively Low
cg11539173	GNB1L	54584	0.0532841	0.0541352	0.991664	NA	Constitutively Low
cg11256279	C7orf23	79161	0.0250676	0.0249707	0.991664	K4	Constitutively Low
cg11018904	SPEF1	25876	0.0761649	0.0791324	0.991664	K4+K27	Constitutively Low
cg10850580	UBR4	23352	0.0351831	0.0347902	0.991664	K4	Constitutively Low
cg10648908	ARFGAP3	26286	0.0277112	0.0315063	0.991664	K4	Constitutively Low
cg10643489	RQCD1	9125	0.188379	0.193084	0.991664	K4	Constitutively Low
cg10525488	C4orf32	132720	0.134959	0.162598	0.991664	K4+K27	Constitutively Low
cg10377451	RAB33B	83452	0.01958	0.019602	0.991664	K4	Constitutively Low
cg10316635	INADL	10207	0.0747525	0.0765453	0.991664	K4	Constitutively Low
cg09890046	QPCTL	54814	0.0252319	0.0252781	0.991664	K4	Constitutively Low
cg09869042	CENPM	79019	0.0212016	0.0213777	0.991664	K4	Constitutively Low
cg09391966	GIT2	9815	0.0135367	0.0127377	0.991664	K4	Constitutively Low
cg08902132	ETF1	2107	0.0286692	0.0285835	0.991664	K4	Constitutively Low
cg08881067	GFM2	84340	0.0269905	0.0266116	0.991664	K4	Constitutively Low
cg08831594	TSPAN15	23555	0.0446311	0.0451859	0.991664	K4+K27	Constitutively Low
cg08731300	FZD8	8325	0.0488278	0.0661427	0.991664	K4	Constitutively Low
cg08633154	PCGF5	84333	0.0138586	0.0136974	0.991664	K4+K27	Constitutively Low
cg08551088	C10orf119	79892	0.0670442	0.0674486	0.991664	K4	Constitutively Low
cg08293367	YPEL1	29799	0.0392881	0.0406116	0.991664	K4	Constitutively Low
cg08063013	COX8A	1351	0.0169971	0.0166773	0.991664	K4	Constitutively Low
cg08039281	PSMA6	5687	0.0302417	0.030325	0.991664	K4	Constitutively Low
cg07713361	APOL1	8542	0.0907329	0.0974901	0.991664	NA	Constitutively Low
cg07707227	CDC20B	166979	0.0180152	0.0181548	0.991664	NA	Constitutively Low
cg07535879	MTRF1L	54516	0.0485275	0.0472159	0.991664	K4	Constitutively Low
cg07477160	NDRG1	10397	0.0144659	0.0145353	0.991664	K4+K27	Constitutively Low
cg07357256	MRPS26	64949	0.0262507	0.0257081	0.991664	K4	Constitutively Low
cg07223164	OSTC	58505	0.0879946	0.0878033	0.991664	K4	Constitutively Low
cg07103819	DGAT1	8694	0.0481913	0.0499913	0.991664	NA	Constitutively Low
cg06421707	PYGB	5834	0.0108539	0.0108178	0.991664	K4	Constitutively Low
cg06090630	TCEB2	6923	0.0129676	0.016943	0.991664	K4	Constitutively Low
cg05698069	PDLIM2	64236	0.0571315	0.0813702	0.991664	NA	Constitutively Low
cg05501658	E2F4	1874	0.0142093	0.0137783	0.991664	K4	Constitutively Low
cg05475028	BOD1L	259282	0.0450324	0.0451398	0.991664	K4	Constitutively Low
cg05473871	ADAMTSL5	339366	0.0914771	0.104731	0.991664	None	Constitutively Low
cg04893087	PPARGC1A	10891	0.071796	0.0698592	0.991664	K4+K27	Constitutively Low
cg04856685	MAP4	4134	0.054901	0.0557339	0.991664	K4	Constitutively Low
cg04076481	KRI1	65095	0.128749	0.12954	0.991664	K4	Constitutively Low
cg03822011	FANCF	2188	0.0226455	0.0327391	0.991664	K4	Constitutively Low
cg03703325	HEMK1	51409	0.0205049	0.0207322	0.991664	K4	Constitutively Low
cg03332970	ESAM	90952	0.037172	0.0374073	0.991664	K4+K27	Constitutively Low
cg03217964	ZFP1	162239	0.0249664	0.0259872	0.991664	K4	Constitutively Low
cg03212129	PDCD2L	84306	0.0287575	0.0296543	0.991664	K4	Constitutively Low
cg02755525	NETO2	81831	0.0390275	0.116971	0.991664	K4+K27	Constitutively Low
cg02628930	KLHL8	57563	0.0127847	0.0124835	0.991664	K4	Constitutively Low
cg02597269	MON1B	22879	0.0301671	0.0300139	0.991664	K4	Constitutively Low
cg02147791	SAP18	10284	0.0435801	0.0370532	0.991664	K4	Constitutively Low
cg01490535	FAM86C	55199	0.0810699	0.0810417	0.991664	NA	Constitutively Low
cg01191395	SAT2	112483	0.0181732	0.0171917	0.991664	K4	Constitutively Low
cg00950418	SRPK2	6733	0.0224916	0.0231443	0.991664	K4	Constitutively Low
cg00940891	FGFRL1	53834	0.0448171	0.0488939	0.991664	K4	Constitutively Low
cg00901493	YBX2	51087	0.0518379	0.0516688	0.991664	K4	Constitutively Low
cg00676660	ADAMTS9	56999	0.0304283	0.0337241	0.991664	K4+K27	Constitutively Low
cg00256166	KLHL25	64410	0.0303075	0.0310753	0.991664	K4	Constitutively Low
cg00224234	RNMTL1	55178	0.0218992	0.0219295	0.991664	K4	Constitutively Low
cg00056767	C13orf31	144811	0.0479929	0.0601476	0.991664	K4	Constitutively Low
cg27648946	RHOBTB1	9886	0.0622755	0.0712441	0.981895	K4	Constitutively Low
cg27573806	LSM2	57819	0.0297709	0.0269492	0.981895	K4	Constitutively Low
cg27546682	STK40	83931	0.0347894	0.034895	0.981895	K4	Constitutively Low
cg27535305	SCP2	6342	0.111022	0.124855	0.981895	K4+K27	Constitutively Low
cg27462371	ATXN7	6314	0.0570203	0.0596616	0.981895	K4	Constitutively Low
cg27140880	RPL37A	6168	0.0287577	0.0283428	0.981895	K4	Constitutively Low
cg27043582	RNF170	81790	0.07069	0.0711904	0.981895	K4	Constitutively Low
cg26533949	DZIP1L	199221	0.0291746	0.0271053	0.981895	K4	Constitutively Low
cg26387998	HELZ	9931	0.0359789	0.0365331	0.981895	K4	Constitutively Low
cg25902460	STRBP	55342	0.0539005	0.0540506	0.981895	K4	Constitutively Low
cg25820693	SEMA6C	10500	0.0392739	0.040773	0.981895	K4	Constitutively Low
cg25687894	ACLY	47	0.0803595	0.0826093	0.981895	K4	Constitutively Low
cg25619607	IMPACT	55364	0.0243719	0.0383681	0.981895	K4	Constitutively Low
cg25467603	WDR18	57418	0.0180009	0.0185994	0.981895	K4	Constitutively Low
cg25418831	VPS13A	23230	0.0156308	0.0150894	0.981895	K4	Constitutively Low
cg24794758	LENG1	79165	0.0529126	0.052161	0.981895	K4	Constitutively Low
cg24719575	REST	5978	0.0706803	0.0696071	0.981895	K4	Constitutively Low
cg24408199	EIF2B5	8893	0.0449273	0.0447048	0.981895	K4	Constitutively Low
cg24220122	ZNF322A	79692	0.0395205	0.0401131	0.981895	K4	Constitutively Low
cg24181591	EIF5A	1984	0.0325678	0.0344529	0.981895	K4	Constitutively Low
cg23923462	PGAM1	5223	0.0614226	0.0622719	0.981895	K4	Constitutively Low
cg23610018	VGLL4	9686	0.0236653	0.023754	0.981895	K4	Constitutively Low
cg23489497	GPN2	54707	0.0168014	0.016909	0.981895	K4	Constitutively Low
cg23350087	MCOLN1	57192	0.0157283	0.014985	0.981895	K4	Constitutively Low
cg23333420	OBFC1	79991	0.0197897	0.0195408	0.981895	K4	Constitutively Low
cg23274123	C1orf96	126731	0.0292688	0.0282235	0.981895	K4	Constitutively Low
cg23273333	ESRRG	2104	0.131989	0.14403	0.981895	K4+K27	Constitutively Low
cg23150219	C19orf26	255057	0.0509222	0.060709	0.981895	None	Constitutively Low
cg23076086	FYN	2534	0.052974	0.061482	0.981895	K4	Constitutively Low
cg22956956	TFRC	7037	0.0558038	0.0522306	0.981895	K4	Constitutively Low
cg22688260	DPH3	285381	0.0113622	0.0106732	0.981895	K4	Constitutively Low
cg22605342	RSL1D1	26156	0.0279341	0.0282983	0.981895	K4	Constitutively Low
cg22464186	TNFRSF21	27242	0.0861123	0.0905508	0.981895	K4	Constitutively Low
cg22377998	ARVCF	421	0.0334002	0.0411389	0.981895	NA	Constitutively Low
cg22007326	TMED2	10959	0.0335915	0.0331073	0.981895	K4	Constitutively Low
cg21698790	HRK	8739	0.0361915	0.0357992	0.981895	K4+K27	Constitutively Low
cg21219744	GUF1	60558	0.0171166	0.0182293	0.981895	K4	Constitutively Low
cg21048501	MRPS24	64951	0.027793	0.0338924	0.981895	K4	Constitutively Low
cg20648108	CTTNBP2NL	55917	0.0481756	0.0483362	0.981895	K4	Constitutively Low
cg20225275	ATP6V0E1	8992	0.0374945	0.0354681	0.981895	K4	Constitutively Low
cg19905754	ANKRD37	353322	0.0171606	0.0145732	0.981895	K4	Constitutively Low
cg19837824	NTHL1	4913	0.0467859	0.0470016	0.981895	K4	Constitutively Low
cg19767249	DCPS	28960	0.0578531	0.0599086	0.981895	K4	Constitutively Low
cg19604470	CD81	975	0.0448979	0.0513282	0.981895	K4	Constitutively Low
cg19478743	CXCL16	58191	0.0447332	0.0450253	0.981895	K4+K27	Constitutively Low
cg19435409	HIST1H2AL	8332	0.0266518	0.027459	0.981895	K4	Constitutively Low
cg19403346	MGC45800	90768	0.117087	0.128637	0.981895	NA	Constitutively Low
cg19168631	DAAM1	23002	0.0170847	0.0174852	0.981895	K4+K27	Constitutively Low
cg19017420	ARL2	402	0.0424819	0.0438875	0.981895	K4	Constitutively Low
cg18978324	RABGGTA	5875	0.0171396	0.0164454	0.981895	K4	Constitutively Low
cg18601293	RBM26	64062	0.0481475	0.050335	0.981895	K4	Constitutively Low
cg18394496	TMEM179B	374395	0.0201962	0.0201955	0.981895	K4	Constitutively Low
cg18335243	PTGS2	5743	0.0569947	0.123437	0.981895	K4+K27	Constitutively Low
cg17983274	PPME1	51400	0.0296352	0.029967	0.981895	K4	Constitutively Low
cg17808849	HERPUD1	9709	0.0223081	0.0234906	0.981895	K4	Constitutively Low
cg17765461	DAZAP1	26528	0.087334	0.0953455	0.981895	K4	Constitutively Low
cg17751867	GOLPH3	64083	0.0240006	0.0240927	0.981895	K4	Constitutively Low
cg17703658	DDIT3	1649	0.0401308	0.0403687	0.981895	K4	Constitutively Low
cg17647744	TMEM9B	56674	0.0193576	0.019099	0.981895	K4	Constitutively Low
cg17616707	ATP5B	506	0.0163307	0.0163665	0.981895	K4	Constitutively Low
cg17417054	CLSPN	63967	0.103388	0.105674	0.981895	K4	Constitutively Low
cg17061853	C12orf11	55726	0.0203821	0.020712	0.981895	K4	Constitutively Low
cg16525761	RPL34	6164	0.071855	0.0688409	0.981895	K4	Constitutively Low
cg16477324	ADCK4	79934	0.0611759	0.0616468	0.981895	K4	Constitutively Low
cg16474684	RNF4	6047	0.0297201	0.0298463	0.981895	NA	Constitutively Low
cg16341373	CDCA8	55143	0.0497158	0.0470984	0.981895	K4	Constitutively Low
cg16254764	HDAC11	79885	0.0444293	0.0447186	0.981895	NA	Constitutively Low
cg16116363	SH3GLB1	51100	0.0246725	0.024515	0.981895	K4	Constitutively Low
cg15877314	GNAI2	2771	0.0517115	0.0522722	0.981895	K4	Constitutively Low
cg15705999	ZNF148	7707	0.0285411	0.0284775	0.981895	K4	Constitutively Low
cg15589354	URB2	9816	0.103165	0.1043	0.981895	K4	Constitutively Low
cg15562197	C3orf38	285237	0.0173981	0.0170788	0.981895	K4	Constitutively Low
cg15299721	NHEDC2	133308	0.0148731	0.0441827	0.981895	K4+K27	Constitutively Low
cg15299463	TEAD2	8463	0.0185593	0.0294178	0.981895	K4	Constitutively Low
cg15092544	RAP1B	5908	0.00644213	0.0062163	0.981895	K4	Constitutively Low
cg15010390	NDUFC1	4717	0.0569577	0.0584628	0.981895	K4	Constitutively Low
cg14944269	RAB15	376267	0.137718	0.149533	0.981895	NA	Constitutively Low
cg14816013	OBFC2B	79035	0.0378713	0.0374696	0.981895	K4	Constitutively Low
cg14729071	RAD21	5885	0.0284164	0.0285224	0.981895	K4	Constitutively Low
cg14705927	P4HA1	5033	0.0390082	0.0404172	0.981895	K4	Constitutively Low
cg14696348	MC1R	4157	0.0678172	0.0716099	0.981895	NA	Constitutively Low
cg14609458	PRRG4	79056	0.0395686	0.0396359	0.981895	K4	Constitutively Low
cg14297700	TBL3	10607	0.0267361	0.0270191	0.981895	K4	Constitutively Low
cg14187678	TBR1	10716	0.0783787	0.0915272	0.981895	K4+K27	Constitutively Low
cg13906548	GABARAPL2	11345	0.033251	0.033621	0.981895	K4	Constitutively Low
cg13890487	ISCA1	81689	0.0341456	0.0341267	0.981895	K4	Constitutively Low
cg13750354	OCIAD1	54940	0.0708113	0.0711243	0.981895	K4	Constitutively Low
cg13236854	NAPA	8775	0.0220953	0.021494	0.981895	K4	Constitutively Low
cg13133148	SNAPC5	10302	0.0228464	0.0223897	0.981895	K4	Constitutively Low
cg12796229	SLMO1	10650	0.0364083	0.0364397	0.981895	K4	Constitutively Low
cg12533335	TAF1C	9013	0.0736652	0.0736845	0.981895	K4	Constitutively Low
cg12079362	ATP6V0B	533	0.128695	0.128419	0.981895	K4	Constitutively Low
cg11993300	NDST2	8509	0.0227469	0.0226709	0.981895	K4	Constitutively Low
cg11917694	STAMBPL1	57559	0.027281	0.0272617	0.981895	K4+K27	Constitutively Low
cg11390468	IFT57	55081	0.0614828	0.061508	0.981895	K4	Constitutively Low
cg11368578	CDK5	1020	0.0567114	0.0618682	0.981895	K4	Constitutively Low
cg11064797	RELL2	285613	0.0235567	0.0241505	0.981895	K4	Constitutively Low
cg11064206	ABCB9	23457	0.0143918	0.0147806	0.981895	K4	Constitutively Low
cg11047295	HMGB1	3146	0.0339515	0.0342549	0.981895	K4	Constitutively Low
cg11044263	TMEM65	157378	0.0278094	0.0278228	0.981895	K4+K27	Constitutively Low
cg10978402	IQGAP1	8826	0.0196196	0.0199663	0.981895	K4	Constitutively Low
cg10957584	FAM86A	196483	0.0172091	0.0179862	0.981895	NA	Constitutively Low
cg10885645	CLSTN3	9746	0.0259239	0.0315606	0.981895	K4	Constitutively Low
cg10809441	DHX8	1659	0.0488544	0.0494877	0.981895	K4	Constitutively Low
cg10763059	PTPN12	5782	0.0676075	0.0847861	0.981895	NA	Constitutively Low
cg10484485	KIAA0922	23240	0.022084	0.0262193	0.981895	K4	Constitutively Low
cg10474368	SPCS2	9789	0.0151298	0.0149458	0.981895	K4	Constitutively Low
cg10028071	COMMD3	23412	0.0487087	0.0491344	0.981895	K4+K27	Constitutively Low
cg09877136	GMFB	2764	0.047523	0.0475186	0.981895	K4	Constitutively Low
cg09822001	APOA1BP	128240	0.0317815	0.0303696	0.981895	K4	Constitutively Low
cg09693433	CDKL3	51265	0.0435952	0.0434016	0.981895	K4	Constitutively Low
cg09541468	CORO1B	57175	0.0206944	0.0209267	0.981895	K4	Constitutively Low
cg09327628	MARCKSL1	65108	0.0401087	0.0421102	0.981895	K4	Constitutively Low
cg09151429	LPHN1	22859	0.12447	0.129001	0.981895	NA	Constitutively Low
cg09070492	COX15	1355	0.0219254	0.0215358	0.981895	K4	Constitutively Low
cg08914916	MRPS12	6183	0.0186807	0.0187007	0.981895	K4	Constitutively Low
cg08706258	WSB1	26118	0.0113687	0.0113223	0.981895	K4	Constitutively Low
cg08413153	SNX11	29916	0.10695	0.106436	0.981895	K4	Constitutively Low
cg08287471	NEK6	10783	0.113555	0.113511	0.981895	K4	Constitutively Low
cg08198370	MRPS15	64960	0.015615	0.0163926	0.981895	K4	Constitutively Low
cg07955828	DHX35	60625	0.0314015	0.031234	0.981895	K4	Constitutively Low
cg07855056	CCDC55	84081	0.0868288	0.0836247	0.981895	K4	Constitutively Low
cg07777378	GRN	2896	0.0310032	0.0311575	0.981895	K4	Constitutively Low
cg07685221	QTRT1	81890	0.0294071	0.0295418	0.981895	K4	Constitutively Low
cg07331806	AIFM3	150209	0.172761	0.205216	0.981895	K4+K27	Constitutively Low
cg07231132	TMEM92	162461	0.0768499	0.0792366	0.981895	NA	Constitutively Low
cg07125123	RRM2B	50484	0.134394	0.136853	0.981895	K4	Constitutively Low
cg07048351	SERP1	27230	0.0104466	0.00980597	0.981895	K4	Constitutively Low
cg06815666	PRPF31	26121	0.0915855	0.0977377	0.981895	K4	Constitutively Low
cg06731484	IVD	3712	0.0459472	0.0512534	0.981895	K4	Constitutively Low
cg06716436	S1PR2	9294	0.0217107	0.0315366	0.981895	K4	Constitutively Low
cg06493080	HOXB7	3217	0.0711226	0.0688175	0.981895	K4+K27	Constitutively Low
cg06444558	PBK	55872	0.0438683	0.047268	0.981895	K4	Constitutively Low
cg06333435	POLR3D	661	0.017742	0.0180138	0.981895	K4	Constitutively Low
cg06216677	TESK1	7016	0.0139911	0.0146893	0.981895	NA	Constitutively Low
cg05658858	TUBGCP2	10844	0.0143962	0.014372	0.981895	K4	Constitutively Low
cg05523085	MYO5A	4644	0.0343832	0.0372822	0.981895	NA	Constitutively Low
cg05311623	ANXA5	308	0.0430727	0.0576223	0.981895	K4	Constitutively Low
cg04815626	MSRA	4482	0.0422459	0.042352	0.981895	K4	Constitutively Low
cg04506628	SNRPC	6631	0.0357905	0.0324119	0.981895	K4	Constitutively Low
cg04154812	CALCOCO2	10241	0.0945645	0.0934309	0.981895	K4	Constitutively Low
cg04094160	ZBTB5	9925	0.0477414	0.0484045	0.981895	K4	Constitutively Low
cg04006554	ENPP5	59084	0.0116965	0.0116032	0.981895	K4	Constitutively Low
cg03992230	HNRNPH1	3187	0.0560004	0.0546649	0.981895	K4	Constitutively Low
cg03705396	MAP6D1	79929	0.0645689	0.0890896	0.981895	K4	Constitutively Low
cg03445474	CAPRIN1	4076	0.0294769	0.0295686	0.981895	K4	Constitutively Low
cg03169527	C3orf31	132001	0.024113	0.0231226	0.981895	K4	Constitutively Low
cg03161112	ZNF24	7572	0.0219153	0.0220275	0.981895	K4	Constitutively Low
cg03098361	RFC2	5982	0.0470564	0.0471056	0.981895	K4	Constitutively Low
cg02943497	PARP4	143	0.061504	0.0613978	0.981895	K4	Constitutively Low
cg02772367	NUP160	23279	0.0192237	0.0211415	0.981895	K4	Constitutively Low
cg02603366	RPS21	6227	0.023174	0.0236091	0.981895	K4	Constitutively Low
cg02504465	SNX3	8724	0.0219125	0.0221104	0.981895	K4	Constitutively Low
cg02357725	IMP3	55272	0.0282872	0.03048	0.981895	K4	Constitutively Low
cg02337166	NR1D1	9572	0.0667732	0.0710901	0.981895	K4+K27	Constitutively Low
cg02239082	CYTH2	9266	0.0176624	0.0175684	0.981895	K4	Constitutively Low
cg02161046	HIAT1	64645	0.0471595	0.0472827	0.981895	K4	Constitutively Low
cg02160826	MRPS16	51021	0.0231023	0.0231721	0.981895	K4	Constitutively Low
cg01657207	ZNF35	7584	0.168548	0.200622	0.981895	K4	Constitutively Low
cg01372689	MRPL12	6182	0.0352987	0.0383178	0.981895	K4	Constitutively Low
cg01195127	YIPF4	84272	0.0709373	0.071026	0.981895	K4	Constitutively Low
cg00901704	SLC25A19	60386	0.0489416	0.0477631	0.981895	K4	Constitutively Low
cg00811081	RPAP3	79657	0.0588286	0.0533031	0.981895	K4	Constitutively Low
cg00459975	HMBOX1	79618	0.037591	0.0461192	0.981895	K4	Constitutively Low
cg00332745	NOL3	8996	0.0389122	0.0391881	0.981895	K4+K27	Constitutively Low
cg27633903	MBD6	114785	0.0982042	0.0952637	0.974573	K4	Constitutively Low
cg27339143	PSRC1	84722	0.042158	0.0396977	0.974573	K4	Constitutively Low
cg27254601	MAZ	4150	0.0206427	0.0200697	0.974573	NA	Constitutively Low
cg27119451	BRD8	10902	0.0369414	0.0373212	0.974573	K4	Constitutively Low
cg26831968	GBF1	8729	0.01643	0.0159789	0.974573	K4	Constitutively Low
cg26542130	PCBP1	5093	0.0733254	0.0733676	0.974573	K4	Constitutively Low
cg26446827	ZNF133	7692	0.0253488	0.0253897	0.974573	K4	Constitutively Low
cg26255649	ATP5S	27109	0.0177741	0.0180951	0.974573	K4	Constitutively Low
cg26054395	MTF2	22823	0.0361964	0.0363738	0.974573	K4	Constitutively Low
cg26039806	RNF121	55298	0.0315773	0.0316596	0.974573	NA	Constitutively Low
cg25999015	ZNF575	284346	0.0607113	0.0612587	0.974573	K4	Constitutively Low
cg25945303	KLF6	1316	0.0443526	0.0448263	0.974573	K4	Constitutively Low
cg25640176	GFOD2	81577	0.0235368	0.0235397	0.974573	K4	Constitutively Low
cg25506900	TSEN54	283989	0.0285903	0.030508	0.974573	K4	Constitutively Low
cg25415932	OGG1	4968	0.104324	0.117852	0.974573	K4	Constitutively Low
cg25034557	PACS1	55690	0.0798317	0.110765	0.974573	K4	Constitutively Low
cg25018329	E2F8	79733	0.0485765	0.0462751	0.974573	K4	Constitutively Low
cg24977709	SSSCA1	10534	0.0397719	0.0398827	0.974573	NA	Constitutively Low
cg24596576	FANCD2	2177	0.0248884	0.0231009	0.974573	K4	Constitutively Low
cg23948756	KLC1	3831	0.0277733	0.0284107	0.974573	K4	Constitutively Low
cg23641648	MRPS9	64965	0.0288259	0.0288441	0.974573	K4	Constitutively Low
cg23521069	SIP1	8487	0.0260213	0.0255233	0.974573	K4	Constitutively Low
cg23226134	CLCN6	1185	0.0509608	0.0520391	0.974573	K4	Constitutively Low
cg22781236	UBL3	5412	0.0278299	0.0276846	0.974573	K4	Constitutively Low
cg22723026	ANG	283	0.03036	0.0299234	0.974573	K4	Constitutively Low
cg22571217	DAPK1	1612	0.0694874	0.0687814	0.974573	K4	Constitutively Low
cg22441882	SLC18A1	6570	0.133421	0.135283	0.974573	None	Constitutively Low
cg22336401	ENTPD8	377841	0.0731216	0.0743461	0.974573	None	Constitutively Low
cg22313025	HACE1	57531	0.0634095	0.0641565	0.974573	K4	Constitutively Low
cg22001782	BCL9	607	0.0767055	0.101655	0.974573	K4	Constitutively Low
cg21943652	HIPK1	204851	0.0158689	0.0151065	0.974573	K4	Constitutively Low
cg21931212	C12orf57	113246	0.0648162	0.0664336	0.974573	K4	Constitutively Low
cg21609430	ESYT1	23344	0.0266886	0.026064	0.974573	K4	Constitutively Low
cg20319264	NIPSNAP1	8508	0.0424048	0.04231	0.974573	K4	Constitutively Low
cg20172280	OLFML2B	25903	0.113091	0.112334	0.974573	K4+K27	Constitutively Low
cg20168375	LYRM7	90624	0.0445469	0.0442917	0.974573	K4	Constitutively Low
cg19875047	ANKRD42	338699	0.0328597	0.0330726	0.974573	K4	Constitutively Low
cg19586645	MIF4GD	57409	0.0169327	0.0171685	0.974573	K4	Constitutively Low
cg18947521	H3F3A	3020	0.0351357	0.0349597	0.974573	K4	Constitutively Low
cg18938150	LSM12	124801	0.025834	0.0261641	0.974573	K4	Constitutively Low
cg18652852	MAFF	23764	0.0530743	0.0545763	0.974573	K4	Constitutively Low
cg18445047	SPATA2L	124044	0.0637372	0.0724788	0.974573	K4	Constitutively Low
cg18396865	SNX6	58533	0.165462	0.165812	0.974573	K4	Constitutively Low
cg18342900	C16orf87	388272	0.183302	0.184558	0.974573	K4	Constitutively Low
cg18263030	MARK3	4140	0.0269116	0.0266696	0.974573	K4	Constitutively Low
cg17976381	SMARCB1	6598	0.0522653	0.0533597	0.974573	K4	Constitutively Low
cg17872064	NOP58	51602	0.0160593	0.0163084	0.974573	K4	Constitutively Low
cg17733100	C1orf106	55765	0.081588	0.0890392	0.974573	K4	Constitutively Low
cg17617223	ZER1	10444	0.0335364	0.0332313	0.974573	K4	Constitutively Low
cg17593391	RRAGC	64121	0.0317329	0.0365705	0.974573	NA	Constitutively Low
cg17091770	STYX	6815	0.026893	0.026824	0.974573	K4	Constitutively Low
cg16864895	INTS7	25896	0.0816006	0.0821484	0.974573	K4	Constitutively Low

## Sheet: Constitutively High
Supplemental Table 4 - Gene promoter classification among colorectal samples
Probe ID	Gene Symbol	Gene ID	Normal adjacent mean beta-value	Tumor mean beta-value	Normal vs. tumor FDR-adjusted P value	ES cell histone marks	Gene category
cg27003571	GTDC1	79712	0.749843	0.746351	1	None	Constitutively High
cg26757673	IL2RB	3560	0.848289	0.83258	1	None	Constitutively High
cg21242004	VTI1A	143187	0.71463	0.710053	1	K4	Constitutively High
cg20520365	C20orf144	128864	0.943485	0.943201	1	K4	Constitutively High
cg18841952	GPR115	221393	0.736634	0.718642	1	NA	Constitutively High
cg17758148	JMY	133746	0.83606	0.835806	1	NA	Constitutively High
cg16873863	SLC22A18	5002	0.609646	0.596629	1	None	Constitutively High
cg16545105	CRHBP	1393	0.772167	0.769541	1	K4+K27	Constitutively High
cg15551881	TRAF1	7185	0.759522	0.741805	1	None	Constitutively High
cg15296858	PPM1G	5496	0.886219	0.877317	1	NA	Constitutively High
cg10235741	DNASE1L3	1776	0.878957	0.881599	1	None	Constitutively High
cg06263943	CACNA1H	8912	0.630282	0.623418	1	NA	Constitutively High
cg06084117	PLXNA4	91584	0.83556	0.816168	1	NA	Constitutively High
cg04710641	RDBP	7936	0.888048	0.888188	1	K4	Constitutively High
cg04398275	SBNO1	55206	0.823148	0.822104	1	None	Constitutively High
cg01991150	CHRM4	1132	0.882627	0.881619	1	None	Constitutively High
cg01265637	C20orf141	128653	0.870919	0.865823	1	None	Constitutively High
cg24959428	GBP6	163351	0.752206	0.734147	0.991664	None	Constitutively High
cg24516901	FAM124B	79843	0.536307	0.544851	0.991664	None	Constitutively High
cg22378065	PLAGL1	5325	0.765542	0.765409	0.991664	K27	Constitutively High
cg21710060	GRK1	6011	0.90613	0.904081	0.991664	None	Constitutively High
cg21495715	SLC5A10	125206	0.643492	0.628188	0.991664	NA	Constitutively High
cg21484964	C15orf24	56851	0.890848	0.891361	0.991664	K4	Constitutively High
cg20158826	CCS	9973	0.802838	0.796177	0.991664	K4	Constitutively High
cg18787783	MMP19	4327	0.69399	0.677641	0.991664	K4	Constitutively High
cg15727320	P11	8909	0.82793	0.827616	0.991664	None	Constitutively High
cg15534366	CDH4	1002	0.71976	0.719806	0.991664	NA	Constitutively High
cg15352829	PLD4	122618	0.799849	0.797677	0.991664	None	Constitutively High
cg15166050	LCTL	197021	0.92395	0.922436	0.991664	K4	Constitutively High
cg09624565	NCF4	4689	0.643576	0.632447	0.991664	None	Constitutively High
cg04833845	KCNN4	3783	0.578238	0.555141	0.991664	NA	Constitutively High
cg01344518	RGS11	8786	0.590218	0.584567	0.991664	NA	Constitutively High
cg27235662	CLDN16	10686	0.746329	0.745069	0.981895	None	Constitutively High
cg25443975	BRSK1	84446	0.862052	0.852131	0.981895	NA	Constitutively High
cg25141490	IL17B	27190	0.648019	0.643885	0.981895	None	Constitutively High
cg24457403	KRT16	3868	0.779305	0.765395	0.981895	NA	Constitutively High
cg24248317	C2orf18	54978	0.882827	0.883067	0.981895	NA	Constitutively High
cg23352695	EVI2A	2123	0.628744	0.619704	0.981895	None	Constitutively High
cg22875391	TPRG1	285386	0.809834	0.813811	0.981895	None	Constitutively High
cg19815589	C11orf76	220070	0.779938	0.780981	0.981895	NA	Constitutively High
cg18738906	SCNN1A	6337	0.605275	0.598589	0.981895	K4	Constitutively High
cg18204685	BTD	686	0.726175	0.715204	0.981895	K4	Constitutively High
cg18199266	CLEC4F	165530	0.791733	0.788399	0.981895	None	Constitutively High
cg17605084	NCKAP1L	3071	0.568195	0.556823	0.981895	None	Constitutively High
cg16601385	CFD	1675	0.633019	0.622117	0.981895	NA	Constitutively High
cg15178040	GSTA5	221357	0.827315	0.831436	0.981895	NA	Constitutively High
cg12556134	TGIF2	60436	0.529513	0.520457	0.981895	K4	Constitutively High
cg11481351	FNDC7	163479	0.767169	0.767299	0.981895	None	Constitutively High
cg09599653	ARL11	115761	0.867538	0.870805	0.981895	NA	Constitutively High
cg06941093	GLIS1	148979	0.832747	0.800965	0.981895	None	Constitutively High
cg05869585	PMM2	5373	0.930893	0.929698	0.981895	K4	Constitutively High
cg04189838	CYP2C19	1557	0.816672	0.823346	0.981895	NA	Constitutively High
cg02309431	BPIL3	128859	0.838795	0.81759	0.981895	NA	Constitutively High
cg01703884	MYO1H	283446	0.837114	0.828905	0.981895	NA	Constitutively High
cg01040850	MR1	3140	0.622976	0.603408	0.981895	None	Constitutively High
cg00447208	TMC8	147138	0.618495	0.620738	0.981895	NA	Constitutively High
cg25953146	C2orf27B	408029	0.665087	0.660192	0.974573	NA	Constitutively High
cg25813714	CYP4F12	66002	0.795486	0.78491	0.974573	NA	Constitutively High
cg24914244	RTN4IP1	84816	0.780967	0.774659	0.974573	K4	Constitutively High
cg24871743	DIRAS3	9077	0.552526	0.545376	0.974573	NA	Constitutively High
cg23674882	LOXL3	84695	0.610795	0.613314	0.974573	K4+K27	Constitutively High
cg23178308	PDXK	8566	0.595994	0.587859	0.974573	NA	Constitutively High
cg21418076	LTB4R2	56413	0.912264	0.911436	0.974573	None	Constitutively High
cg21092324	MMRN1	22915	0.513311	0.518862	0.974573	None	Constitutively High
cg19954000	FGF1	2246	0.629897	0.642649	0.974573	None	Constitutively High
cg19770955	DUS4L	11062	0.514046	0.512823	0.974573	K4	Constitutively High
cg19149785	KLK8	11202	0.693114	0.69032	0.974573	NA	Constitutively High
cg18915143	PDE6A	5145	0.891403	0.891098	0.974573	None	Constitutively High
cg17947599	ACOXL	55289	0.873026	0.865323	0.974573	None	Constitutively High
cg17386181	MT1B	4490	0.71131	0.706241	0.974573	None	Constitutively High
cg15952725	CELA2A	63036	0.826613	0.820465	0.974573	NA	Constitutively High
cg12530270	DCST1	149095	0.936159	0.93995	0.974573	None	Constitutively High
cg12424907	TAS2R20	259295	0.935958	0.925686	0.974573	NA	Constitutively High
cg10490064	CRYBB2	1415	0.74567	0.738826	0.974573	None	Constitutively High
cg10031456	RASGRP3	25780	0.752608	0.744243	0.974573	None	Constitutively High
cg07453748	MGMT	4255	0.897895	0.876727	0.974573	NA	Constitutively High
cg04991214	PFDN2	5202	0.688191	0.6803	0.974573	K4	Constitutively High
cg04087608	HSD3B2	3284	0.806163	0.804558	0.974573	None	Constitutively High
cg03670238	WISP1	8840	0.580524	0.583336	0.974573	NA	Constitutively High
cg02332537	RTP3	83597	0.619064	0.610995	0.974573	None	Constitutively High
cg02119982	NOD2	64127	0.796054	0.790474	0.974573	None	Constitutively High
cg01459162	PADI3	51702	0.783532	0.757457	0.974573	NA	Constitutively High
cg00101227	MPZ	4359	0.756533	0.750188	0.974573	NA	Constitutively High
cg25919221	CA6	765	0.687219	0.677863	0.966521	None	Constitutively High
cg25548825	TBX10	347853	0.855922	0.846176	0.966521	K27	Constitutively High
cg25423111	TSSK4	283629	0.80166	0.798147	0.966521	None	Constitutively High
cg20672044	HPR	3250	0.889896	0.888175	0.966521	NA	Constitutively High
cg19668234	PRSS50	29122	0.625369	0.616457	0.966521	None	Constitutively High
cg18184219	CEP170	9859	0.818326	0.806426	0.966521	NA	Constitutively High
cg17272094	C3orf45	132228	0.830251	0.824336	0.966521	None	Constitutively High
cg15258980	ARHGAP25	9938	0.677561	0.675087	0.966521	None	Constitutively High
cg12815142	SPAG7	9552	0.638465	0.643218	0.966521	NA	Constitutively High
cg11876012	SNRNP25	79622	0.911565	0.907583	0.966521	K4	Constitutively High
cg11600161	TBC1D10C	374403	0.794553	0.788333	0.966521	None	Constitutively High
cg11429658	ABCC13	150000	0.580802	0.596508	0.966521	NA	Constitutively High
cg11024597	C2orf40	84417	0.781924	0.779786	0.966521	NA	Constitutively High
cg08828036	ATP10A	57194	0.74858	0.739081	0.966521	K4+K27	Constitutively High
cg08452348	CATSPER3	347732	0.935856	0.938074	0.966521	None	Constitutively High
cg08176694	PITPNM2	57605	0.78248	0.776483	0.966521	NA	Constitutively High
cg06812844	TRPM2	7226	0.73864	0.734563	0.966521	None	Constitutively High
cg06641366	LRRC8C	84230	0.799711	0.784666	0.966521	NA	Constitutively High
cg02762689	GUCA1B	2979	0.512733	0.523828	0.966521	NA	Constitutively High
cg01184449	EML4	27436	0.569426	0.572626	0.966521	K4	Constitutively High
cg21366834	CCR4	1233	0.862205	0.85598	0.957831	NA	Constitutively High
cg21226234	LRRC14	9684	0.872523	0.869614	0.957831	K4	Constitutively High
cg19058765	APOH	350	0.763852	0.755064	0.957831	NA	Constitutively High
cg17936488	FAM78A	286336	0.616617	0.616244	0.957831	K4+K27	Constitutively High
cg17574251	FNDC8	54752	0.902184	0.902275	0.957831	None	Constitutively High
cg16540704	ASZ1	136991	0.906814	0.903411	0.957831	None	Constitutively High
cg09864712	RHBDL1	9028	0.720317	0.713384	0.957831	None	Constitutively High
cg09737668	SLAMF9	89886	0.866807	0.857596	0.957831	None	Constitutively High
cg09298484	TSGA10	80705	0.603593	0.605278	0.957831	K4	Constitutively High
cg05291178	C3orf24	115795	0.893195	0.893677	0.957831	None	Constitutively High
cg24743310	SLC47A2	146802	0.907741	0.909468	0.94837	None	Constitutively High
cg24447890	LMAN1L	79748	0.772861	0.772881	0.94837	None	Constitutively High
cg22675150	TUBA3C	7278	0.758767	0.759221	0.94837	None	Constitutively High
cg22054164	ECE1	1889	0.670897	0.66768	0.94837	NA	Constitutively High
cg14896003	RASSF7	8045	0.8692	0.864497	0.94837	K4	Constitutively High
cg14119236	FGF23	8074	0.632725	0.625598	0.94837	None	Constitutively High
cg12775479	IGSF10	285313	0.885596	0.880515	0.94837	None	Constitutively High
cg12727795	PDGFRB	5159	0.533818	0.519171	0.94837	K4	Constitutively High
cg11095315	PABPN1	8106	0.86538	0.86526	0.94837	K4	Constitutively High
cg10334928	STON2	85439	0.880719	0.870863	0.94837	None	Constitutively High
cg09280976	MEG3	55384	0.619652	0.614099	0.94837	NA	Constitutively High
cg07883333	F11R	50848	0.950259	0.949023	0.94837	NA	Constitutively High
cg05890484	BHMT	635	0.541258	0.539809	0.94837	K4+K27	Constitutively High
cg05023116	NLRP5	126206	0.9286	0.925334	0.94837	None	Constitutively High
cg04916980	PCBD1	5092	0.682007	0.679716	0.94837	NA	Constitutively High
cg04712892	NRAP	4892	0.902308	0.899275	0.94837	None	Constitutively High
cg04275881	SLAMF8	56833	0.649329	0.640755	0.94837	None	Constitutively High
cg01255591	R3HDML	140902	0.838767	0.822895	0.94837	None	Constitutively High
cg00095526	CACNA1S	779	0.719419	0.724033	0.94837	None	Constitutively High
cg00022866	CCDC88B	283234	0.66887	0.675433	0.94837	K4	Constitutively High
cg27149093	SLC41A2	84102	0.783642	0.786308	0.938651	None	Constitutively High
cg25411725	SLC22A13	9390	0.804911	0.805133	0.938651	NA	Constitutively High
cg24192663	HSPA6	3310	0.859932	0.846701	0.938651	NA	Constitutively High
cg18908499	C1orf150	148823	0.626977	0.629718	0.938651	None	Constitutively High
cg18621299	EVL	51466	0.574213	0.564712	0.938651	None	Constitutively High
cg17786776	FKBP9	11328	0.538178	0.527424	0.938651	NA	Constitutively High
cg16465769	SLC22A7	10864	0.832453	0.821955	0.938651	None	Constitutively High
cg15750705	GJB4	127534	0.93196	0.932152	0.938651	None	Constitutively High
cg15448245	GGT5	2687	0.660722	0.662229	0.938651	NA	Constitutively High
cg14145194	ICAM3	3385	0.667034	0.667092	0.938651	None	Constitutively High
cg13650156	PILRA	29992	0.690945	0.663429	0.938651	NA	Constitutively High
cg09258965	TBC1D7	51256	0.776286	0.781733	0.938651	NA	Constitutively High
cg09088576	CSF3R	1441	0.634546	0.630171	0.938651	None	Constitutively High
cg07084746	C3orf27	23434	0.773794	0.775465	0.938651	None	Constitutively High
cg07056057	DYNLL2	140735	0.750384	0.740075	0.938651	NA	Constitutively High
cg06682185	SERPINB5	5268	0.792509	0.786495	0.938651	NA	Constitutively High
cg05016508	FLRT1	23769	0.957849	0.957095	0.938651	None	Constitutively High
cg04143809	SLC38A11	151258	0.73809	0.719053	0.938651	K4+K27	Constitutively High
cg02351381	C12orf34	84915	0.576466	0.585095	0.938651	None	Constitutively High
cg01321151	AP2A2	161	0.528006	0.528836	0.938651	K4	Constitutively High
cg00551244	C8orf78	157376	0.817338	0.808509	0.938651	NA	Constitutively High
cg26317111	UBE2U	148581	0.962856	0.961318	0.928773	None	Constitutively High
cg23075286	GALP	85569	0.712024	0.686687	0.928773	None	Constitutively High
cg22197830	TXNDC15	79770	0.699127	0.69099	0.928773	K4	Constitutively High
cg14365123	ACTRT2	140625	0.885232	0.8819	0.928773	None	Constitutively High
cg14027234	CD248	57124	0.620094	0.633509	0.928773	None	Constitutively High
cg13273136	PSD4	23550	0.757301	0.742083	0.928773	None	Constitutively High
cg10516359	SLC35C1	55343	0.912436	0.865899	0.928773	K4	Constitutively High
cg10134939	FAM176A	84141	0.673981	0.670303	0.928773	None	Constitutively High
cg09296212	NAIF1	203245	0.803783	0.794816	0.928773	K4	Constitutively High
cg08835688	GRB10	2887	0.784794	0.775844	0.928773	NA	Constitutively High
cg07732037	MPHOSPH9	10198	0.750471	0.754132	0.928773	NA	Constitutively High
cg04014889	MAGEL2	54551	0.618879	0.629121	0.928773	None	Constitutively High
cg00659129	ASAP1	50807	0.838283	0.809357	0.928773	None	Constitutively High
cg27050763	AHCTF1	25909	0.873339	0.872114	0.918004	None	Constitutively High
cg26368842	PIP4K2A	5305	0.529138	0.52891	0.918004	NA	Constitutively High
cg25427580	B3GALT1	8708	0.899682	0.893149	0.918004	None	Constitutively High
cg24829483	C1QTNF7	114905	0.653106	0.654171	0.918004	None	Constitutively High
cg24474182	P2RY13	53829	0.768387	0.764013	0.918004	None	Constitutively High
cg24116886	DEFB127	140850	0.903745	0.889839	0.918004	K27	Constitutively High
cg23404467	KIR3DL3	115653	0.886538	0.883986	0.918004	NA	Constitutively High
cg20862496	SLURP1	57152	0.872372	0.852336	0.918004	None	Constitutively High
cg20451680	ESM1	11082	0.636831	0.635747	0.918004	None	Constitutively High
cg20349377	KLHL1	57626	0.839113	0.837174	0.918004	NA	Constitutively High
cg18389810	TPPP2	122664	0.894185	0.890538	0.918004	None	Constitutively High
cg17675150	ZNF532	55205	0.722163	0.722037	0.918004	K4	Constitutively High
cg15046675	CD37	951	0.731108	0.702462	0.918004	None	Constitutively High
cg13477510	SEPT5	5413	0.907171	0.889209	0.918004	NA	Constitutively High
cg13468685	PLEK	5341	0.766356	0.740817	0.918004	None	Constitutively High
cg13439299	DNAJC5G	285126	0.799528	0.801931	0.918004	None	Constitutively High
cg12650635	AQP2	359	0.754997	0.74556	0.918004	None	Constitutively High
cg11668512	ZHX3	23051	0.935701	0.937817	0.918004	NA	Constitutively High
cg10062065	SPEG	10290	0.741819	0.747406	0.918004	NA	Constitutively High
cg09996240	HMG20B	10362	0.961355	0.958102	0.918004	K4	Constitutively High
cg09480837	PLCE1	51196	0.860279	0.854431	0.918004	NA	Constitutively High
cg08663969	ABCG1	9619	0.914858	0.915467	0.918004	None	Constitutively High
cg07930578	LTK	4058	0.831223	0.820405	0.918004	NA	Constitutively High
cg06803253	GNAT1	2779	0.859662	0.85909	0.918004	None	Constitutively High
cg04086834	SMAP1	60682	0.721306	0.695365	0.918004	K4	Constitutively High
cg03804500	SSNA1	8636	0.868958	0.869377	0.918004	K4	Constitutively High
cg01120307	SEMA4D	10507	0.8698	0.87211	0.918004	None	Constitutively High
cg26976437	LY6K	54742	0.804194	0.797993	0.909197	None	Constitutively High
cg26361780	CPB1	1360	0.867098	0.862397	0.909197	None	Constitutively High
cg25690265	TMC5	79838	0.891092	0.892024	0.909197	None	Constitutively High
cg24747122	GNA13	10672	0.635784	0.62185	0.909197	NA	Constitutively High
cg24392574	CALML5	51806	0.932179	0.930866	0.909197	None	Constitutively High
cg22214414	SYCP2	10388	0.858279	0.864857	0.909197	K27	Constitutively High
cg21968796	C21orf70	85395	0.776384	0.759533	0.909197	K4	Constitutively High
cg20851245	RNF25	64320	0.895108	0.894228	0.909197	K4	Constitutively High
cg19921389	GP9	2815	0.874745	0.874337	0.909197	None	Constitutively High
cg19393006	TSC1	7248	0.521585	0.515662	0.909197	NA	Constitutively High
cg17095731	LRP8	7804	0.670863	0.673937	0.909197	NA	Constitutively High
cg11845202	KRT78	196374	0.868735	0.867309	0.909197	None	Constitutively High
cg11667117	CA5A	763	0.79141	0.767835	0.909197	NA	Constitutively High
cg10375110	CHRNA9	55584	0.700443	0.687319	0.909197	None	Constitutively High
cg06391660	DCTN1	1639	0.870627	0.870021	0.909197	K4	Constitutively High
cg05200628	CD48	962	0.545428	0.535851	0.909197	None	Constitutively High
cg03165378	S100A9	6280	0.770641	0.761519	0.909197	None	Constitutively High
cg02706881	NCRNA00175	378832	0.785157	0.782345	0.909197	NA	Constitutively High
cg01197831	FBP2	8789	0.801799	0.786507	0.909197	None	Constitutively High
cg26504906	PRSS16	10279	0.670675	0.661269	0.899784	None	Constitutively High
cg26014197	ZSCAN10	84891	0.803806	0.771941	0.899784	None	Constitutively High
cg24126851	DCHS1	8642	0.634517	0.642598	0.899784	NA	Constitutively High
cg20648149	SYNE2	23224	0.610734	0.614895	0.899784	NA	Constitutively High
cg19998328	C19orf52	90580	0.515939	0.496678	0.899784	K4	Constitutively High
cg19579782	TRDMT1	1787	0.609927	0.602213	0.899784	K4	Constitutively High
cg19257200	SOX10	6663	0.827071	0.819441	0.899784	K4+K27	Constitutively High
cg19109431	NFKBIE	4794	0.596388	0.576683	0.899784	NA	Constitutively High
cg14784653	BEND7	222389	0.775089	0.775691	0.899784	None	Constitutively High
cg14493899	TAP2	6891	0.881363	0.876409	0.899784	NA	Constitutively High
cg14183455	MATN1	4146	0.852635	0.84901	0.899784	None	Constitutively High
cg12694870	HPD	3242	0.757346	0.756756	0.899784	K4	Constitutively High
cg12683641	KLK14	43847	0.826477	0.81952	0.899784	None	Constitutively High
cg12611860	PIK3C2A	5286	0.844104	0.837998	0.899784	None	Constitutively High
cg12347740	IL34	146433	0.806901	0.805888	0.899784	None	Constitutively High
cg10430690	KALRN	8997	0.889473	0.88202	0.899784	None	Constitutively High
cg07740640	BHLHA15	168620	0.949976	0.949498	0.899784	K4	Constitutively High
cg02097420	HRG	3273	0.893794	0.868101	0.899784	None	Constitutively High
cg01747191	C6orf182	285753	0.902623	0.889789	0.899784	NA	Constitutively High
cg00611397	GTPBP5	26164	0.862471	0.861408	0.899784	NA	Constitutively High
cg00138126	PMEPA1	56937	0.656933	0.644439	0.899784	NA	Constitutively High
cg27600136	RASL11A	387496	0.712346	0.691526	0.890687	K4+K27	Constitutively High
cg27114026	CELA1	1990	0.811222	0.811799	0.890687	None	Constitutively High
cg26349773	ATP6V0A4	50617	0.786616	0.778617	0.890687	K4	Constitutively High
cg24612198	CD3E	916	0.723341	0.712789	0.890687	None	Constitutively High
cg22243733	OLFML1	283298	0.738034	0.728932	0.890687	None	Constitutively High
cg21068030	LSMD1	84316	0.846369	0.834864	0.890687	K4	Constitutively High
cg20972495	SEC22C	9117	0.837286	0.837979	0.890687	NA	Constitutively High
cg20748065	POR	5447	0.795917	0.804537	0.890687	NA	Constitutively High
cg18638931	MOV10L1	54456	0.718168	0.713379	0.890687	None	Constitutively High
cg16627949	RNASE8	122665	0.639074	0.638994	0.890687	None	Constitutively High
cg16519742	ZIM2	23619	0.854969	0.850091	0.890687	NA	Constitutively High
cg15821095	RBM15B	29890	0.678771	0.68255	0.890687	NA	Constitutively High
cg14127336	TCL1A	8115	0.825359	0.804658	0.890687	None	Constitutively High
cg13976438	C12orf50	160419	0.813038	0.808363	0.890687	None	Constitutively High
cg13383572	PRH1	5554	0.874948	0.875509	0.890687	NA	Constitutively High
cg10107671	FLJ45684	400666	0.969521	0.967955	0.890687	NA	Constitutively High
cg09044738	FAM12A	10876	0.782562	0.786926	0.890687	None	Constitutively High
cg07221454	MS4A10	341116	0.503533	0.508309	0.890687	None	Constitutively High
cg06003187	GUCA2A	2980	0.620923	0.612472	0.890687	None	Constitutively High
cg04457794	CTSE	1510	0.60279	0.57032	0.890687	None	Constitutively High
cg04057485	PTGIR	5739	0.923613	0.923704	0.890687	None	Constitutively High
cg02261346	MPPED1	758	0.879188	0.869539	0.890687	NA	Constitutively High
cg02077702	ISLR	3671	0.610369	0.605479	0.890687	NA	Constitutively High
cg01946401	RUNX2	860	0.744061	0.731633	0.890687	K4	Constitutively High
cg00323915	GIMAP4	55303	0.55505	0.547048	0.890687	None	Constitutively High
cg00256074	MYLPF	29895	0.816038	0.813177	0.890687	None	Constitutively High
cg26783353	SLC25A2	83884	0.954721	0.950416	0.881038	NA	Constitutively High
cg24691453	S100A4	6275	0.648994	0.637353	0.881038	None	Constitutively High
cg23431988	PIWIL2	55124	0.84496	0.844565	0.881038	K4	Constitutively High
cg21244955	PI4KA	5297	0.859368	0.852921	0.881038	NA	Constitutively High
cg20925811	MMP9	4318	0.688515	0.671904	0.881038	None	Constitutively High
cg20789824	OLFML2A	169611	0.75751	0.753232	0.881038	NA	Constitutively High
cg17627559	TSPAN32	10077	0.525732	0.530233	0.881038	None	Constitutively High
cg17063201	HCRTR2	3062	0.796025	0.784584	0.881038	NA	Constitutively High
cg16590151	SYNCRIP	10492	0.501577	0.501799	0.881038	K4	Constitutively High
cg16356956	CSF2RB	1439	0.863883	0.846124	0.881038	None	Constitutively High
cg16125615	CAPS	828	0.773761	0.758504	0.881038	NA	Constitutively High
cg14808739	SREBF1	6720	0.715848	0.709567	0.881038	NA	Constitutively High
cg13952892	SRPR	6734	0.919062	0.915649	0.881038	K4	Constitutively High
cg09547777	CASQ1	844	0.857034	0.845301	0.881038	None	Constitutively High
cg08632701	SETD4	54093	0.861614	0.852921	0.881038	NA	Constitutively High
cg07380416	CD6	923	0.786054	0.773259	0.881038	None	Constitutively High
cg04176254	AGRP	181	0.941332	0.93729	0.881038	K4	Constitutively High
cg00415993	F2RL2	2151	0.662135	0.644925	0.881038	None	Constitutively High
cg27461196	FXYD1	5348	0.747273	0.754497	0.870709	None	Constitutively High
cg26832879	TFPT	29844	0.864127	0.863271	0.870709	K4	Constitutively High
cg24110063	COX6A2	1339	0.509121	0.498081	0.870709	K27	Constitutively High
cg20483763	CABP4	57010	0.982928	0.982338	0.870709	None	Constitutively High
cg19945840	B3GALT6	126792	0.546147	0.550192	0.870709	None	Constitutively High
cg19876838	KCNJ14	3770	0.648462	0.634106	0.870709	None	Constitutively High
cg17500329	C8orf17	56988	0.955261	0.95511	0.870709	NA	Constitutively High
cg15997411	JAK1	3716	0.902554	0.903559	0.870709	NA	Constitutively High
cg15798530	TRPC3	7222	0.859643	0.841893	0.870709	NA	Constitutively High
cg15603885	ABRA	137735	0.960744	0.956141	0.870709	None	Constitutively High
cg14386312	ZNF544	27300	0.512603	0.519809	0.870709	K4	Constitutively High
cg13765961	MS4A1	931	0.711113	0.687949	0.870709	None	Constitutively High
cg13685294	GRM2	2912	0.945362	0.929777	0.870709	K27	Constitutively High
cg11821702	MLANA	2315	0.835536	0.821481	0.870709	None	Constitutively High
cg11628026	ACTL7A	10881	0.933508	0.933032	0.870709	None	Constitutively High
cg11492403	AARSD1	80755	0.552546	0.575991	0.870709	K4	Constitutively High
cg10328573	KRT9	3857	0.534472	0.549495	0.870709	None	Constitutively High
cg08996986	EPS8L1	54869	0.892716	0.872286	0.870709	NA	Constitutively High
cg08950375	COL6A3	1293	0.636	0.618165	0.870709	NA	Constitutively High
cg08433095	DYX1C1	161582	0.637879	0.646262	0.870709	NA	Constitutively High
cg06213598	ABCA9	10350	0.646481	0.631872	0.870709	NA	Constitutively High
cg04740359	NTF3	4908	0.641596	0.612121	0.870709	None	Constitutively High
cg02717866	C11orf66	220004	0.718886	0.720436	0.870709	None	Constitutively High
cg02229946	IL1F7	27178	0.79329	0.788655	0.870709	NA	Constitutively High
cg01031251	RPS6KA1	6195	0.557502	0.557606	0.870709	NA	Constitutively High
cg24929834	C22orf31	25770	0.796422	0.792435	0.861075	None	Constitutively High
cg24924631	BCL2A1	597	0.892216	0.886655	0.861075	NA	Constitutively High
cg23977670	H19	283120	0.73735	0.710105	0.861075	NA	Constitutively High
cg21466821	HIPK4	147746	0.712435	0.698502	0.861075	None	Constitutively High
cg20967028	ART4	420	0.886372	0.878772	0.861075	None	Constitutively High
cg20895028	CDH26	60437	0.523731	0.496374	0.861075	None	Constitutively High
cg20851097	SPTB	6710	0.588003	0.576116	0.861075	None	Constitutively High
cg20625138	UTS2	10911	0.638556	0.641892	0.861075	None	Constitutively High
cg19539519	PYY2	23615	0.948521	0.939361	0.861075	NA	Constitutively High
cg18613421	WDR72	256764	0.574157	0.589055	0.861075	K4+K27	Constitutively High
cg18390025	ELOVL3	83401	0.639201	0.649128	0.861075	K4+K27	Constitutively High
cg16131766	MKRN3	7681	0.742525	0.721898	0.861075	None	Constitutively High
cg16014085	ZNF48	197407	0.555245	0.539031	0.861075	NA	Constitutively High
cg15814508	P2RY14	9934	0.588952	0.574915	0.861075	None	Constitutively High
cg14014225	SLC16A8	23539	0.891296	0.880742	0.861075	K4+K27	Constitutively High
cg13696887	KRT82	3888	0.925051	0.902192	0.861075	None	Constitutively High
cg12576844	LEAP2	116842	0.837362	0.843205	0.861075	NA	Constitutively High
cg11158430	UTS2D	257313	0.746412	0.731364	0.861075	NA	Constitutively High
cg10784341	PHACTR2	9749	0.715244	0.711984	0.861075	None	Constitutively High
cg09414535	GRIP1	23426	0.741399	0.718443	0.861075	None	Constitutively High
cg09360083	THYN1	29087	0.751251	0.752279	0.861075	K4	Constitutively High
cg09303642	NFE2	4778	0.814846	0.802423	0.861075	NA	Constitutively High
cg08970446	SLC1A7	6512	0.949357	0.945256	0.861075	None	Constitutively High
cg07732644	ASPA	443	0.707389	0.707428	0.861075	NA	Constitutively High
cg07064406	YWHAB	7529	0.886329	0.886633	0.861075	NA	Constitutively High
cg05161795	ZDHHC3	51304	0.510062	0.496486	0.861075	K4	Constitutively High
cg03873930	ARFRP1	10139	0.70575	0.705301	0.861075	K4	Constitutively High
cg02385474	PCNXL2	80003	0.747595	0.728898	0.861075	NA	Constitutively High
cg02082571	CLEC4A	50856	0.850787	0.836204	0.861075	None	Constitutively High
cg00008493	COX8C	341947	0.966412	0.967342	0.861075	None	Constitutively High
cg26657648	IL1R1	3554	0.789724	0.737287	0.852003	NA	Constitutively High
cg26112639	NLRP3	114548	0.607705	0.614265	0.852003	NA	Constitutively High
cg25734864	PROZ	8858	0.547727	0.528734	0.852003	None	Constitutively High
cg23471482	CCL22	6367	0.869601	0.851476	0.852003	NA	Constitutively High
cg20366831	APBA3	9546	0.624279	0.641402	0.852003	K4	Constitutively High
cg18508525	CD36	948	0.832741	0.773013	0.852003	NA	Constitutively High
cg17791936	SLC37A4	2542	0.738486	0.690571	0.852003	NA	Constitutively High
cg16911220	KRT86	3892	0.784064	0.77603	0.852003	NA	Constitutively High
cg15544721	PPP1R9A	55607	0.601277	0.580669	0.852003	K4	Constitutively High
cg15186584	C9orf24	84688	0.882734	0.883366	0.852003	None	Constitutively High
cg15171237	CASP3	836	0.871581	0.8721	0.852003	K4	Constitutively High
cg14386061	DOK2	9046	0.656187	0.643053	0.852003	None	Constitutively High
cg13354523	CLEC1A	51267	0.70447	0.719159	0.852003	None	Constitutively High
cg12380854	LRRC46	90506	0.746174	0.739478	0.852003	K4	Constitutively High
cg09015232	SLC12A5	57468	0.55134	0.533411	0.852003	NA	Constitutively High
cg07499372	USP29	57663	0.957132	0.957321	0.852003	None	Constitutively High
cg06200339	SOX30	11063	0.893519	0.874048	0.852003	None	Constitutively High
cg05184394	FAM123C	205147	0.674321	0.671394	0.852003	K4+K27	Constitutively High
cg02164386	HIGD1B	51751	0.608978	0.600295	0.852003	None	Constitutively High
cg26220985	DPT	1805	0.693358	0.693874	0.841352	None	Constitutively High
cg26025891	PSTPIP1	9051	0.517579	0.497863	0.841352	None	Constitutively High
cg25414165	C10orf11	83938	0.717046	0.695887	0.841352	None	Constitutively High
cg23022999	RINL	126432	0.666786	0.628198	0.841352	None	Constitutively High
cg20804101	SLC6A13	6540	0.517169	0.522657	0.841352	None	Constitutively High
cg20526800	FAM83C	128876	0.569325	0.561326	0.841352	NA	Constitutively High
cg19636871	LDHAL6B	92483	0.906351	0.904548	0.841352	None	Constitutively High
cg17518965	S1PR4	8698	0.777577	0.76684	0.841352	None	Constitutively High
cg17384214	C6orf48	50854	0.857628	0.860604	0.841352	NA	Constitutively High
cg15516226	BTNL9	153579	0.904539	0.904887	0.841352	None	Constitutively High
cg10935064	SYCP3	50511	0.977393	0.977465	0.841352	None	Constitutively High
cg10157098	FAM71F1	84691	0.755928	0.739782	0.841352	None	Constitutively High
cg08377000	TIGD2	166815	0.809268	0.804925	0.841352	K4	Constitutively High
cg07374928	FAM118B	79607	0.847199	0.847266	0.841352	NA	Constitutively High
cg05721199	SAMD7	344658	0.790535	0.792951	0.841352	None	Constitutively High
cg01169610	INPP4A	3631	0.913568	0.919266	0.841352	NA	Constitutively High
cg27056145	ATG7	10533	0.917357	0.92098	0.830956	NA	Constitutively High
cg25203980	ACAP3	116983	0.908702	0.880783	0.830956	None	Constitutively High
cg21750589	ZNF323	64288	0.575367	0.582713	0.830956	None	Constitutively High
cg20519035	FAM83H	286077	0.924968	0.924579	0.830956	NA	Constitutively High
cg20202438	NPPA	4878	0.636993	0.632178	0.830956	None	Constitutively High
cg20189782	C5orf40	408263	0.846398	0.844185	0.830956	None	Constitutively High
cg19881895	SLC43A3	29015	0.85845	0.859454	0.830956	NA	Constitutively High
cg17250929	S100A5	6276	0.789957	0.775752	0.830956	None	Constitutively High
cg13550877	C14orf148	122945	0.902537	0.893867	0.830956	NA	Constitutively High
cg13214422	MYOZ3	91977	0.791494	0.7841	0.830956	None	Constitutively High
cg12894984	PNMT	5409	0.615095	0.616927	0.830956	NA	Constitutively High
cg12467090	PIK3C2B	5287	0.809784	0.811602	0.830956	None	Constitutively High
cg11540997	DUOX2	50506	0.672764	0.661606	0.830956	K4+K27	Constitutively High
cg11505048	APOBEC4	403314	0.521649	0.523194	0.830956	None	Constitutively High
cg11063110	CPA5	93979	0.640086	0.64031	0.830956	None	Constitutively High
cg09893068	CCDC17	149483	0.745794	0.746997	0.830956	None	Constitutively High
cg09457245	ZNF385A	25946	0.686581	0.681408	0.830956	None	Constitutively High
cg08256691	RIT1	6016	0.553651	0.5309	0.830956	NA	Constitutively High
cg05646865	SLFNL1	200172	0.899355	0.899011	0.830956	None	Constitutively High
cg01169624	SGCE	8910	0.555756	0.535902	0.830956	K4	Constitutively High
cg00623593	DOCK1	1793	0.768386	0.770922	0.830956	NA	Constitutively High
cg00548060	NPL	80896	0.820659	0.823853	0.830956	None	Constitutively High
cg27459381	CHST12	55501	0.889161	0.888113	0.820273	NA	Constitutively High
cg27100123	SERPINB8	5271	0.549458	0.524495	0.820273	K4	Constitutively High
cg26770281	FIZ1	84922	0.92425	0.921157	0.820273	K4	Constitutively High
cg23901896	ELF3	1999	0.638099	0.641937	0.820273	NA	Constitutively High
cg23680518	SBSN	374897	0.802034	0.807582	0.820273	NA	Constitutively High
cg23323879	CILP	8483	0.793236	0.799068	0.820273	NA	Constitutively High
cg22416721	DMP1	1758	0.805215	0.764855	0.820273	NA	Constitutively High
cg19035993	C22orf30	253143	0.934063	0.930701	0.820273	None	Constitutively High
cg16297030	AGXT2	64902	0.728299	0.713381	0.820273	None	Constitutively High
cg14283939	THSD4	79875	0.908743	0.920541	0.820273	NA	Constitutively High
cg13525683	TIAF1	9220	0.818577	0.825023	0.820273	None	Constitutively High
cg13162577	C11orf42	160298	0.913165	0.905827	0.820273	None	Constitutively High
cg12268344	PRM1	5619	0.82382	0.823172	0.820273	None	Constitutively High
cg11554937	HSD17B3	3293	0.895802	0.909808	0.820273	None	Constitutively High
cg11406340	IDI2	91734	0.821336	0.823436	0.820273	None	Constitutively High
cg11254522	FGR	2268	0.870843	0.865275	0.820273	NA	Constitutively High
cg08035082	AMPD3	272	0.907304	0.903392	0.820273	NA	Constitutively High
cg05950276	TMTC4	84899	0.848768	0.847662	0.820273	NA	Constitutively High
cg05330360	ZPBP2	124626	0.582306	0.592	0.820273	None	Constitutively High
cg04167867	MORC1	27136	0.928588	0.923853	0.820273	None	Constitutively High
cg03721967	GRTP1	79774	0.897637	0.89863	0.820273	NA	Constitutively High
cg01026744	NAP1L5	266812	0.671184	0.676929	0.820273	K4	Constitutively High
cg27476329	GOLGA2L1	55592	0.829643	0.828743	0.809537	None	Constitutively High
cg27442349	NFKBIB	4793	0.766877	0.772075	0.809537	K4	Constitutively High
cg26267561	OXT	5020	0.885513	0.889648	0.809537	K4+K27	Constitutively High
cg26221491	C20orf173	140873	0.853749	0.85092	0.809537	NA	Constitutively High
cg25464840	FRMD4A	55691	0.522217	0.511996	0.809537	None	Constitutively High
cg25162794	ANKRD23	200539	0.848088	0.848615	0.809537	None	Constitutively High
cg23953831	CD101	9398	0.589933	0.60923	0.809537	None	Constitutively High
cg21644628	HEATR3	55027	0.851394	0.853653	0.809537	K4	Constitutively High
cg21400896	ABI3	51225	0.652318	0.658393	0.809537	K4	Constitutively High
cg18989919	C3orf36	80111	0.88048	0.866802	0.809537	K4+K27	Constitutively High
cg17264470	FGF21	26291	0.863616	0.847159	0.809537	None	Constitutively High
cg16466334	MMP3	4314	0.705056	0.694825	0.809537	None	Constitutively High
cg12216205	SFRS18	25957	0.873192	0.8716	0.809537	NA	Constitutively High
cg11998307	SCARF1	8578	0.86106	0.864702	0.809537	None	Constitutively High
cg10787197	C6orf105	84830	0.517665	0.535219	0.809537	NA	Constitutively High
cg10618882	LRRC25	126364	0.731555	0.73251	0.809537	NA	Constitutively High
cg09944526	EXOC6	54536	0.596783	0.602257	0.809537	None	Constitutively High
cg09326702	SLC22A11	55867	0.633841	0.618683	0.809537	None	Constitutively High
cg07260017	CSF1R	1436	0.713242	0.719086	0.809537	None	Constitutively High
cg06312477	PRSS38	339501	0.82373	0.824958	0.809537	None	Constitutively High
cg03136712	DND1	373863	0.949367	0.953362	0.809537	None	Constitutively High
cg02582754	MAS1	4142	0.906049	0.898357	0.809537	NA	Constitutively High
cg02510853	PKMYT1	9088	0.569675	0.558397	0.809537	NA	Constitutively High
cg01889448	HLA-DQB1	3119	0.600029	0.59249	0.809537	NA	Constitutively High
cg00859655	CYB5R2	51700	0.71107	0.714893	0.809537	K4	Constitutively High
cg00295325	ABCB11	8647	0.760276	0.734042	0.809537	None	Constitutively High
cg27550918	SYNPO2L	79933	0.774377	0.7706	0.798439	None	Constitutively High
cg24661752	AP2M1	1173	0.873547	0.866873	0.798439	NA	Constitutively High
cg23807646	SLC26A8	116369	0.685677	0.668402	0.798439	K4	Constitutively High
cg22082462	CPNE6	9362	0.774034	0.780214	0.798439	None	Constitutively High
cg20256783	KRT75	9119	0.878257	0.857329	0.798439	None	Constitutively High
cg19776453	CEACAM1	634	0.803979	0.793384	0.798439	NA	Constitutively High
cg17974185	CTNNBL1	56259	0.616048	0.641908	0.798439	K4	Constitutively High
cg17192247	MAPRE3	22924	0.584255	0.555403	0.798439	K4	Constitutively High
cg17122311	IL27	246778	0.831923	0.836733	0.798439	None	Constitutively High
cg16068833	CD52	1043	0.678777	0.666869	0.798439	None	Constitutively High
cg15836722	IL1B	3553	0.648836	0.660102	0.798439	None	Constitutively High
cg14913610	KLRG1	10219	0.769386	0.721638	0.798439	None	Constitutively High
cg12274567	SH2D1B	117157	0.86352	0.860478	0.798439	None	Constitutively High
cg11450827	CLDN5	7122	0.696894	0.687654	0.798439	K4	Constitutively High
cg10694914	POU2AF1	5450	0.688753	0.698152	0.798439	None	Constitutively High
cg08032971	DMBX1	127343	0.78331	0.774473	0.798439	None	Constitutively High
cg06730286	IFT140	9742	0.82098	0.822169	0.798439	None	Constitutively High
cg02126424	CTRL	1506	0.897997	0.901162	0.798439	None	Constitutively High
cg01227741	GIMAP7	168537	0.910348	0.878387	0.798439	NA	Constitutively High
cg27533013	KCNRG	283518	0.843594	0.850169	0.787435	NA	Constitutively High
cg26478992	ASPN	54829	0.889095	0.887491	0.787435	NA	Constitutively High
cg25934198	C9orf139	401563	0.819257	0.817587	0.787435	NA	Constitutively High
cg24977027	THNSL2	55258	0.579794	0.561182	0.787435	K4	Constitutively High
cg22941086	C12orf40	283461	0.876061	0.86855	0.787435	None	Constitutively High
cg22322184	RETN	56729	0.683757	0.672834	0.787435	K4	Constitutively High
cg21489873	C9orf45	81571	0.906741	0.904791	0.787435	NA	Constitutively High
cg21453309	FAM101A	144347	0.680487	0.68107	0.787435	None	Constitutively High
cg21378206	IL1F5	26525	0.944132	0.935161	0.787435	None	Constitutively High
cg21274025	PLA2G3	50487	0.736391	0.74168	0.787435	K4	Constitutively High
cg20655558	DNAJB7	150353	0.919995	0.922778	0.787435	None	Constitutively High
cg18466173	C21orf93	246704	0.810416	0.79335	0.787435	NA	Constitutively High
cg16788436	GRLF1	2909	0.955215	0.954922	0.787435	None	Constitutively High
cg15896447	CHMP4A	29082	0.870832	0.865832	0.787435	K4	Constitutively High
cg15847988	PLSCR2	57047	0.88758	0.894768	0.787435	None	Constitutively High
cg12332316	F12	2161	0.9393	0.933626	0.787435	None	Constitutively High
cg11466837	TRIM29	23650	0.805388	0.812491	0.787435	NA	Constitutively High
cg08615333	TGFB3	7043	0.702355	0.719575	0.787435	K4	Constitutively High
cg07484450	C11orf64	283197	0.753727	0.735413	0.787435	NA	Constitutively High
cg06026755	HAUS2	55142	0.89018	0.885195	0.787435	K4	Constitutively High
cg04748010	POU6F2	11281	0.501845	0.517069	0.787435	None	Constitutively High
cg04106785	CDK5R1	8851	0.754623	0.726017	0.787435	NA	Constitutively High
cg00730260	C12orf67	144360	0.8888	0.890386	0.787435	None	Constitutively High
cg27589921	CIAPIN1	57019	0.911336	0.917228	0.776797	NA	Constitutively High
cg24541550	MRVI1	10335	0.608563	0.587021	0.776797	None	Constitutively High
cg21375825	LCT	3938	0.749778	0.755924	0.776797	None	Constitutively High
cg20858526	CTRC	11330	0.581725	0.55691	0.776797	None	Constitutively High
cg19393233	ERV3	2086	0.822289	0.830971	0.776797	NA	Constitutively High
cg18109798	SLCO1C1	53919	0.608038	0.577637	0.776797	None	Constitutively High
cg14378480	DNASE2B	58511	0.854679	0.856382	0.776797	None	Constitutively High
cg14324838	EPB41L1	2036	0.861841	0.847148	0.776797	None	Constitutively High
cg13379763	CCDC108	255101	0.787063	0.76664	0.776797	NA	Constitutively High
cg13224710	TGIF1	7050	0.786152	0.769817	0.776797	None	Constitutively High
cg11630392	GPR171	29909	0.715552	0.699376	0.776797	None	Constitutively High
cg11532513	LRTM1	57408	0.806506	0.773904	0.776797	None	Constitutively High
cg11286122	PHLDB1	23187	0.7361	0.7269	0.776797	K4+K27	Constitutively High
cg09217923	TAAR2	9287	0.846169	0.837696	0.776797	None	Constitutively High
cg07753644	P2RY11	5032	0.529504	0.512869	0.776797	None	Constitutively High
cg05819268	CACNG1	786	0.96162	0.966365	0.776797	None	Constitutively High
cg03584646	TBC1D8	11138	0.84647	0.844415	0.776797	NA	Constitutively High
cg03243506	TMC2	117532	0.808291	0.797964	0.776797	None	Constitutively High
cg03003256	FAM26D	221301	0.684928	0.669689	0.776797	NA	Constitutively High
cg02910574	CHMP1A	5119	0.572782	0.548598	0.776797	K4	Constitutively High
