# Supplementary material for: Genome-scale analysis of aberrant DNA methylation in colorectal cancer
Source: HighWire-hosted journal article supplement (doi:10.1101/gr.117523.110), 2011-06-09
Supplement: Hinoue_Supplemental_Table5.xlsx [file Hinoue_Supplemental_Table5.xlsx]

## Sheet: sheet1
Supplemental Table 5 - Genes that were hypermethylated with β-value difference >0.20 and showed more than 2-fold decrease in their gene expression levels in CIMP-H tumors.
Expresssion Probe ID	Expression probe nuID	Refseq	Gene Symbol	DNA methylation CIMP-H			DNA methylation Non-CIMP			Expression CIMP-H	Expression Non-CIMP
				Mean Tumor	Mean Normal	Mean Difference	Mean Tumor	Mean Normal	Mean Difference	Fold change Normal/Tumor	Fold change Normal/Tumor
ILMN_1814327	9QSiOIvUj73tS.UCpI	NM_032049 NM_031850 NM_004835 NM_009585 NM_000685	AGTR1	0.77003	0.098145	0.671885	0.45079	0.100248	0.350542	2.1725	1.9685
ILMN_1671478	EA4JWlRFYRSV559cHw	NM_001823	CKB	0.359677	0.0510603	0.308617	0.235701	0.0356442	0.200057	4.03342	3.51622
ILMN_1789400	cmZ53ab3e1Hq7k_PwE	NM_004474	FOXD2	0.671971	0.290273	0.381698	0.519596	0.268804	0.250791	5.09167	2.16065
ILMN_2153916	E7X7lCxiNz76C3_szk	NM_021979	HSPA2	0.631637	0.267028	0.364609	0.426709	0.191891	0.234818	2.33767	2.29929
ILMN_2327860	6dFQSN.UitTroIYwV4	NM_022440 NM_022439 NM_002371 NM_022438	MAL	0.634838	0.0509866	0.583851	0.295967	0.0451349	0.250832	3.72983	3.27023
ILMN_2149164	rR_nfrF7q8k0L3VSrI	NM_003012	SFRP1	0.82007	0.494215	0.325855	0.682525	0.35935	0.323175	7.75294	6.31044
ILMN_1722898	xpUB_6tEBXviMCenvM	NM_003013	SFRP2	0.649353	0.092032	0.557321	0.464283	0.107714	0.35657	3.97732	2.99415
ILMN_2126038	cHUr4Ht6eCQqKt6RlU	NM_007029	STMN2	0.67842	0.395397	0.283023	0.559148	0.339249	0.219898	3.41337	2.47037
ILMN_2109197	xntytbWu7SP9dI8juU	NM_012307	EPB41L3	0.679537	0.461032	0.218505	0.544124	0.316558	0.227565	2.9818	2.29203
ILMN_1730645	0cCok79EunocWIn6HE	NM_016192	TMEFF2	0.603314	0.16244	0.440873	0.429648	0.11923	0.310417	2.06018	2.40238
ILMN_1689088	TuROh4NEyPddbSwW5g	NM_130386	COLEC12	0.673342	0.220828	0.452514	0.378943	0.183875	0.195068	2.25848	1.98279
ILMN_1679391	3EKQ5xffz1V.gcX_C0	NM_153267	MAMDC2	0.728934	0.18964	0.539294	0.318182	0.118563	0.199619	9.36751	6.21724
ILMN_1759330	oFYu8lcp17Hubkfinc	NM_004321	KIF1A	0.501465	0.0544811	0.446984	0.0401616	0.0292247	0.0109369	2.34507	1.96526
ILMN_1695157	TSXd75dJ3UL1KfWtfI	NM_000717	CA4	0.68818	0.113121	0.575059	0.113379	0.0772697	0.0361096	23.8136	20.437
ILMN_1761789	cp5d53UIVAhXqBdd60	NM_005182 NM_001014435	CA7	0.42816	0.0691675	0.358993	0.108116	0.0639061	0.0442095	4.82071	4.42347
ILMN_1669410	BlUQfwE_GPX3eBEpJ8	NM_001275	CHGA	0.690218	0.213004	0.477214	0.189103	0.142164	0.0469387	15.6487	12.1257
ILMN_1809456	K1XhXnXNUSz8OV7S1c	NM_147164 NM_001842	CNTFR	0.516548	0.0291318	0.487417	0.0451841	0.0239247	0.0212593	3.38269	2.73569
ILMN_1701441	Ef7_Kh281J36yUReQ4	NM_057159 NM_001401	LPAR1	0.257365	0.0490171	0.208347	0.0268242	0.0355064	-0.00868223	3.16287	2.53808
ILMN_1703205	Tq7UqVbIiE.COuzhIk	NM_207034 NM_207033 NM_000114 NM_207032	EDN3	0.536195	0.326443	0.209751	0.454319	0.306842	0.147477	4.48529	3.19664
ILMN_2358886	ripRim2n8hEjTJ3Eos	NM_207034 NM_207033 NM_000114 NM_207032	EDN3	0.536195	0.326443	0.209751	0.454319	0.306842	0.147477	4.61855	3.14486
ILMN_2322996	NdaDznfsXu6er98tvo	NM_172111 NM_172110 NM_005244 NM_172113 NM_172112	EYA2	0.631014	0.134143	0.496871	0.24898	0.0997289	0.149251	5.61394	2.30561
ILMN_1715748	6SeonnyugB1AwLmntk	NM_001458	FLNC	0.485703	0.0140669	0.471636	0.0212163	0.014121	0.00709533	3.51686	2.02121
ILMN_1680390	HIky7_py6v3hJU6g5U	NM_001491 NM_145655 NM_145649	GCNT2	0.661215	0.352715	0.3085	0.485133	0.473262	0.0118705	2.65753	1.98848
ILMN_1810716	QUUJV.eJX134cUo0Ug	NM_001496	GFRA3	0.525912	0.0674326	0.458479	0.140471	0.0771304	0.0633405	2.24674	2.28134
ILMN_1775814	crpRMJTz0cs4cvu3pI	NM_000163	GHR	0.386795	0.0702492	0.316546	0.0504912	0.0567203	-0.00622906	2.88138	2.4831
ILMN_1802397	lZpbgoRTXknQXQosQU	NM_002067	GNA11	0.49684	0.147414	0.349426	0.159112	0.125819	0.0332928	2.62737	2.05112
ILMN_1795257	u0oleop3olR7H5345c	NM_005309	GPT	0.90104	0.638968	0.262071	0.774562	0.687811	0.0867515	5.76343	3.5844
ILMN_1726666	6faKG5XRV0etR6fiHQ	NM_002084	GPX3	0.318478	0.0543375	0.264141	0.0873218	0.0460749	0.0412469	3.38941	3.68806
ILMN_1815203	cpX09d1OeQ0e16nzrk	NM_005518	HMGCS2	0.816006	0.487876	0.32813	0.601994	0.525268	0.0767256	21.0385	7.3268
ILMN_1808258	c0CeLS6d_YOVTJILVo	NM_001040173 NM_001040172 NM_000870	HTR4	0.529672	0.20629	0.323381	0.0609551	0.0978708	-0.0369158	3.6702	2.2028
ILMN_1660086	l1V3Xr9RF0hGRL0ULk	NM_001040114 NM_001040113 NM_022844 NM_002474	MYH11	0.557741	0.0747111	0.48303	0.15379	0.0747903	0.0789997	16.2313	3.08774
ILMN_1814221	Kkl.6s0Dq0AU6heUXU	NM_002522	NPTX1	0.714539	0.0426108	0.671928	0.120417	0.0352287	0.0851879	3.03466	3.64533
ILMN_1685387	rdxCJV5V3vopEv8gwo	NM_002644	PIGR	0.787334	0.512649	0.274684	0.74788	0.562896	0.184984	15.2477	6.25885
ILMN_1769394	uFlO1F07cIGqFJNTSU	NM_006225	PLCD1	0.630311	0.343025	0.287286	0.449642	0.312903	0.136739	3.57788	2.43849
ILMN_2062714	rl55P5uN0IXUlILV9Q	NM_000953	PTGDR	0.51565	0.170271	0.34538	0.170023	0.140327	0.0296965	3.0596	2.05002
ILMN_1740917	630Xr1xXbVxe141614	NM_000336	SCNN1B	0.365153	0.135296	0.229857	0.23575	0.151085	0.0846656	5.4402	6.03347
ILMN_1689111	0SXicSOVOWPfYCU75Q	NM_000609 NM_001033886 NM_199168	CXCL12	0.60811	0.227506	0.380604	0.201809	0.248841	-0.0470319	2.90424	2.85531
ILMN_1791447	BS4MBTTflHFV14JRJI	NM_199168	CXCL12	0.60811	0.227506	0.380604	0.201809	0.248841	-0.0470319	5.57399	5.56561
ILMN_1812824	Knnt4FQUhog45XoF4I	NM_001048	SST	0.625521	0.351312	0.274209	0.438847	0.25057	0.188277	3.65126	6.74357
ILMN_1728570	KYi4XgILrhZiWfO6BQ	NM_003206 NM_198392	TCF21	0.469582	0.19367	0.275913	0.421921	0.283143	0.138778	3.04977	2.14649
ILMN_1766712	WXd3tUVZiBH8QYYoj0	NM_003206	TCF21	0.469582	0.19367	0.275913	0.421921	0.283143	0.138778	3.03103	1.99046
ILMN_1752214	uSUBX5cKA6CL_5Ineg	NM_001077	UGT2B17	0.576841	0.345437	0.231404	0.54264	0.371404	0.171235	19.7388	9.52255
ILMN_2373670	N1ALxVEQC8eJ9fO.RE	NM_001077	UGT2B17	0.576841	0.345437	0.231404	0.54264	0.371404	0.171235	11.2631	5.91432
ILMN_2305407	3RCViiNWVh6KMiCGxc	NM_001018011 NM_006006	ZBTB16	0.263885	0.0262349	0.23765	0.0234712	0.0245649	-0.00109369	3.17677	2.48523
ILMN_1715991	cpUoJA1Xl.LOBRzCwU	NM_004657	SDPR	0.269548	0.0447862	0.224762	0.0720711	0.0439309	0.0281402	2.36667	2.47041
ILMN_1680987	3cXFOXvudK7_9NeU1U	NM_004821	HAND1	0.470573	0.0588599	0.411713	0.0909035	0.0473498	0.0435537	4.83276	3.07118
ILMN_1776953	3CBVEhgxeipOOJilWo	NM_006097	MYL9	0.456525	0.243353	0.213172	0.320552	0.193855	0.126697	2.26354	2.42827
ILMN_1675062	Tbs1URA5CdFCtV3S1U	NM_181526 NM_006097	MYL9	0.456525	0.243353	0.213172	0.320552	0.193855	0.126697	2.78542	2.53455
ILMN_1696657	iX_6IDu0XVUFY9Hf90	NM_201630 NM_006338	LRRN2	0.393982	0.126075	0.267907	0.163871	0.0652051	0.0986663	3.56495	3.08956
ILMN_1789648	odUCHSdV7yOneXtfVQ	NM_006998	SCGN	0.48746	0.231305	0.256155	0.200768	0.18113	0.0196376	3.33325	3.59316
ILMN_1666536	93j6rnXqbnvntL55vc	NM_014312	VSIG2	0.555264	0.352222	0.203042	0.559183	0.370786	0.188397	9.05221	9.54628
ILMN_1680948	6PV1FR_XtFUtFwkNHo	NM_012134	LMOD1	0.248053	0.0358916	0.212161	0.038491	0.028024	0.0104671	2.51792	2.20925
ILMN_1791280	it1ISdTSgUJApSMl4Q	NM_014365	HSPB8	0.379088	0.12232	0.256768	0.0661544	0.0864402	-0.0202858	3.09416	2.46259
ILMN_1746888	uSKJJzePoBeWHy5rjI	NM_013363	PCOLCE2	0.64887	0.0748876	0.573983	0.0368723	0.0445362	-0.00766392	4.56906	5.79608
ILMN_1778650	TEHjkUp74oXlIqboV4	NM_015873	VILL	0.491513	0.125401	0.366111	0.373588	0.188431	0.185157	2.25868	1.95356
ILMN_1671891	6WKAX5VTR0k_R8jEg4	NM_001100818 NM_017933	PID1	0.356254	0.131176	0.225078	0.136926	0.129774	0.0071521	3.10283	2.12217
ILMN_1657373	KU6Ur5couq1HjgCK78	NM_018192	LEPREL1	0.484911	0.0497835	0.435128	0.0471387	0.0476952	-0.000556475	4.34046	2.71976
ILMN_1703572	KuD33Ip_7Ecevv8vqU	NM_022843	PCDH20	0.367568	0.0668156	0.300752	0.078446	0.0465029	0.0319432	3.21281	2.16453
ILMN_2180885	QuER.qBRgjhdhKAeSk	NM_025087	CWH43	0.676368	0.276291	0.400077	0.284676	0.210308	0.0743683	6.66667	5.06352
ILMN_1715612	Bro.cacdXeprTbQTeU	NM_178160	OTOP2	0.444502	0.0691047	0.375397	0.0969094	0.0701683	0.0267411	3.93981	3.39914
ILMN_1788942	ZnR56dKVQXel.wvFyE	NM_001122890 NM_153338	GGT6	0.74945	0.46749	0.28196	0.718275	0.565194	0.15308	4.59223	2.88091
ILMN_1721283	rX0IVB4kVnePVRJf3U	NM_144617	HSPB6	0.597228	0.323798	0.27343	0.42817	0.259657	0.168513	4.91654	4.16222
ILMN_1808157	lXy6UiHh9Cv89SIdSI	NM_138290	RUNDC3B	0.331287	0.0177835	0.313503	0.0170638	0.0164157	0.000648105	2.55018	2.03128
ILMN_1789096	fUheh_BdAlwro6foQ4	NM_152672	OSTalpha	0.734475	0.475776	0.258699	0.612058	0.462371	0.149687	9.5373	2.85206
ILMN_1751062	xKBJBHXp4QcJQzpXK0	NM_173833	SCARA5	0.615888	0.133898	0.48199	0.155536	0.130903	0.0246332	6.65916	5.90606
ILMN_1788267	fT36geVWVRIp.zd4nk	NM_017726	PPP1R14D	0.773868	0.505158	0.26871	0.526269	0.557153	-0.0308837	3.80304	1.90865
ILMN_2115434	oUu_eMzp95937u5dJ0	NM_006834	RAB32	0.553815	0.163969	0.389846	0.0931774	0.100485	-0.00730763	2.11501	1.2979
ILMN_1689176	ifgoH5T1_f4UeTgefc	NM_024574	C4orf31	0.289804	0.0640022	0.225802	0.0401573	0.0437292	-0.00357188	2.08138	1.36595
ILMN_1742544	ou.dPsAp5Z6ukglCIU	NM_002397	MEF2C	0.321237	0.0117864	0.30945	0.012517	0.0160862	-0.00356926	2.24844	1.42043
ILMN_1779448	Hs8SyFnhvVC4SNSpf0	NM_025202	EFHD1	0.348855	0.131822	0.217033	0.134993	0.134121	0.000872433	2.2481	1.33828
ILMN_1731374	TgCvBIxJ2i_4kdx5CE	NM_001873	CPE	0.468035	0.0545713	0.413464	0.0361455	0.0348178	0.00132764	2.5228	1.15718
ILMN_2087692	cVeeL6A9S5JHj4US_U	NM_024843	CYBRD1	0.263882	0.0134766	0.250405	0.0162131	0.0131297	0.00308334	2.67984	1.62592
ILMN_2369666	olf.CgpHACJ7XrNyFQ	NM_001877 NM_001006658	CR2	0.296788	0.0234187	0.273369	0.0296472	0.0234263	0.00622085	2.20163	1.26905
ILMN_1760493	Q_7Ylfq6pSiiuOm0ig	NM_017980	LIMS2	0.620903	0.396021	0.224882	0.374014	0.367579	0.00643484	2.43395	1.76038
ILMN_1779071	ZiQmZqtf5b6fcucsNM	NM_005103	FEZ1	0.236825	0.0340705	0.202755	0.0556462	0.0440722	0.011574	2.0489	1.44979
ILMN_2374234	QU5Gvc5J0jLnBPYsXU	NM_002731 NM_207578 NM_182948	PRKACB	0.571516	0.0260533	0.545463	0.0229546	0.00824586	0.0147087	2.08648	1.67967
ILMN_1755850	cbLX7qElLrSO5JdKIw	NM_021632	ZNF350	0.48916	0.125127	0.364033	0.148478	0.133171	0.0153072	2.05373	1.15525
ILMN_1797342	96KT.nu4pY2UewK1yI	NM_015033	FNBP1	0.533118	0.0274474	0.505671	0.0466318	0.0272038	0.0194281	2.35316	1.49962
ILMN_2067656	6d0S7Hcwiu6u3v60o4	NM_001759	CCND2	0.333627	0.07989	0.253737	0.0946776	0.0702873	0.0243903	2.17655	1.24832
ILMN_1782079	Kl1d9h8fqLSTeFEtuE	NM_153018	ZFP3	0.232629	0.023237	0.209392	0.06059	0.0321913	0.0283987	2.32362	1.35508
ILMN_1711928	rde0g1Ben85FyO1UkU	NM_025149	ACSF2	0.295859	0.0775841	0.218275	0.112814	0.0809595	0.0318542	2.37115	1.35007
ILMN_1680874	ircfyu5nq3eud9Hvl4	NM_178012	TUBB2B	0.412105	0.0410907	0.371015	0.0797076	0.0402325	0.0394751	2.36424	1.91171
ILMN_2173294	NFA1Ar3pUX7SKfUV50	NM_018271	THNSL2	0.525115	0.140716	0.3844	0.182287	0.126584	0.0557029	2.21775	1.09016
ILMN_2377900	0ni05u_DVH0uRe6XdI	NM_005909	MAP1B	0.679902	0.0708906	0.609012	0.108893	0.0500823	0.0588111	2.21485	1.76978
ILMN_1789166	uf_LXalSDbNUCV1Tpc	NM_020209	SHD	0.887219	0.12667	0.760549	0.168681	0.0952785	0.0734029	2.20599	1.83352
ILMN_1722713	0W6n1p3e6OkrTuCE0M	NM_001996 NM_006486 NM_006485 NM_006487	FBLN1	0.657911	0.380081	0.27783	0.484745	0.400402	0.084343	2.128	1.39372
ILMN_1700541	i0I6N3dlGkW0nX_6UI	NM_001996 XM_001718348	FBLN1	0.657911	0.380081	0.27783	0.484745	0.400402	0.084343	2.74518	1.49423
ILMN_1672536	Z0Uqg6eo.dpHeTTU38	NM_006486	FBLN1	0.657911	0.380081	0.27783	0.484745	0.400402	0.084343	2.6627	1.4889
ILMN_1806710	o4V7t1B55FU1YV7dZQ	NM_031475	ESPN	0.464027	0.188473	0.275555	0.277495	0.185807	0.0916883	2.44248	1.30195
ILMN_2246956	3TkXAX.oA3lupXUjJ0	NM_000633	BCL2	0.53437	0.0636215	0.470749	0.189331	0.0922685	0.0970621	2.03308	1.75975
ILMN_1812031	ZX5zBVd5967uGKVWO8	NM_002579 NM_001040134	PALM	0.517089	0.227178	0.289912	0.309881	0.211186	0.0986949	2.50262	1.56843
ILMN_2072178	cJAK6QVOikgIKGUl4U	NM_024693	ECHDC3	0.459582	0.129201	0.330381	0.206872	0.103061	0.103811	2.03172	1.02824
ILMN_1763433	rHdQ4h0OnqW6yHTL10	NM_015163	TRIM9	0.596612	0.0183779	0.578234	0.121738	0.0167932	0.104944	2.07059	1.77896
ILMN_2350634	EFju.lS3QOU7liB5VI	NM_001039349 NM_001039348 NM_004105	EFEMP1	0.499359	0.233729	0.265631	0.356634	0.249122	0.107512	2.0143	1.72765
ILMN_1735877	916TUi4S4HwkDxXXFQ	NM_001039349 NM_001039348 NM_004105	EFEMP1	0.499359	0.233729	0.265631	0.356634	0.249122	0.107512	2.05248	1.63291
ILMN_1739594	lKF_Xd6De0FS.6nUro	NM_147161	ACOT11	0.547285	0.236702	0.310583	0.392931	0.265445	0.127485	2.20978	1.74382
ILMN_1807493	33SlydI45qLnrFQFXc	NM_001077401 NM_000020	ACVRL1	0.796478	0.542093	0.254384	0.636499	0.507327	0.129172	2.04837	1.78575
ILMN_1779416	96ih0v3USX3Ul7uMQs	NM_020974	SCUBE2	0.566795	0.160888	0.405907	0.277915	0.140117	0.137798	2.56203	1.57534
ILMN_1736670	ZkINSxfkTILJBU1flw	NM_005398	PPP1R3C	0.672586	0.125396	0.54719	0.237341	0.0903193	0.147022	3.06762	1.55323
ILMN_1718520	310RfkX1cf94PnOHHU	NM_001031709	RNLS	0.626763	0.0738929	0.55287	0.212888	0.0654882	0.1474	2.70246	1.51303
ILMN_1749131	Hq6ejtcV.NNXRYXFBs	NM_005021	ENPP3	0.761797	0.401138	0.360659	0.552929	0.405055	0.147874	3.84213	1.459
ILMN_1742025	Td6.WOoSgLTGpBLOaA	NM_014279	OLFM1	0.432693	0.0992382	0.333455	0.229949	0.0715756	0.158373	2.28012	1.5262
ILMN_2108735	BJnZRnS5W.xQwHiYVQ	NM_001958	EEF1A2	0.491501	0.109182	0.382319	0.230052	0.069405	0.160647	2.03321	1.77587
ILMN_1692058	6pX04X56kSAEV26LEc	NM_002487	NDN	0.835486	0.61016	0.225326	0.759533	0.594589	0.164944	2.20045	1.67052
ILMN_1653828	04qkX6fWXucn_U7Teg	NM_018223	CHFR	0.697748	0.03238	0.665368	0.218996	0.0451993	0.173796	2.2136	1.11549
ILMN_1776363	NlAMIiljrgH.4hFc6U	NM_020977 NM_001148	ANK2	0.65119	0.357531	0.293659	0.41883	0.241442	0.177388	2.05525	1.88907
ILMN_1748323	EXexMxXwgZVdREeVVI	NM_004887	CXCL14	0.546436	0.0910787	0.455357	0.221227	0.0418516	0.179376	2.82101	1.30618
ILMN_1676088	3oLk6h.V3eR1J3x7FM	NM_198080 NM_001031679	MSRB3	0.742551	0.0664792	0.676072	0.227737	0.0458292	0.181908	2.50016	1.81778
ILMN_2332553	3dJTSbUhTXILf1Q3RI	NM_198080 NM_001031679	MSRB3	0.742551	0.0664792	0.676072	0.227737	0.0458292	0.181908	2.18886	1.71846
ILMN_1736078	B3ptFMhFEObopYfpv8	XM_001715879* XM_001714714* NM_003248 XM_001715927*	THBS4	0.51025	0.144415	0.365835	0.343677	0.126645	0.217033	2.97319	1.7991
ILMN_1680973	NZmj0o_aoZICvCkf8A	NM_001451	FOXF1	0.618115	0.0979611	0.520154	0.292137	0.0631909	0.228946	2.08701	1.2092
ILMN_1731062	HVIHafghXkO646gOIc	NM_000905	NPY	0.640213	0.369177	0.271036	0.527088	0.291656	0.235433	2.12866	1.86236
ILMN_1765620	Nk1T5SX57SPQD5.9yI		VSTM2A	0.457039	0.149681	0.307358	0.387473	0.100445	0.287028	2.09113	1.83149
ILMN_1772627	B_mSa7k0im7niCrrvA	NM_001040101 NM_014392	D4S234E	0.518084	0.183383	0.334702	0.434597	0.142762	0.291835	2.06619	1.49103
ILMN_1741688	uUguq6Xgld3efis_Vc	NM_198148	CPXM2	0.561713	0.147548	0.414165	0.47818	0.173683	0.304496	2.76271	1.75274
ILMN_1769575	0g7h0IdiljGKe495f4	XM_001726649 NM_032801	JAM3	0.504339	0.0919318	0.412407	0.397629	0.0877272	0.309902	2.03308	1.52527
ILMN_1746359	QifBTl1PqC3If4lKxI	NM_032918	RERG	0.625152	0.0925871	0.532565	0.387001	0.0716035	0.315397	2.5202	1.7228
ILMN_1673566	uloEAOK7sgSrVEr_qE	NM_006988	ADAMTS1	0.687007	0.10644	0.580567	0.390626	0.0689575	0.321669	2.16287	1.7746
ILMN_1676449	KeGnXX_6GK_IC64Lmk	NM_004787	SLIT2	0.60899	0.0884087	0.520582	0.407473	0.0819049	0.325568	2.61178	1.63321
ILMN_1789074	oon0If5P1yz97_0vdA	NM_005345	HSPA1A	0.755673	0.0711212	0.684552	0.451023	0.0520295	0.398993	2.20252	1.11562
ILMN_2399463	0f7fl7OSV27DGuDyLo	NM_001079874 NM_006113	VAV3	0.762386	0.111717	0.65067	0.520053	0.102636	0.417418	3.97132	1.07045
ILMN_1657679	lvk.TqXqr9ckijPolU	NM_001079874 NM_006113	VAV3	0.762386	0.111717	0.65067	0.520053	0.102636	0.417418	4.01249	1.14035
